# Supplementary material for: Rational Design of Palladium(II) Indenyl and Allyl Complexes Bearing Phosphine and Isocyanide Ancillary Ligands with Promising Antitumor Activity
Source: MDPI journal article supplement (doi:10.3390/molecules29020345), 2024-01-10

## checkCIF/PLATON report

Structure factors have been supplied for datablock(s) EB52RT

THIS REPORT IS FOR GUIDANCE ONLY. IF USED AS PART OF A REVIEW PROCEDURE FOR PUBLICATION, IT SHOULD NOT REPLACE THE EXPERTISE OF AN EXPERIENCED CRYSTALLOGRAPHIC REFEREE.

No syntax errors found.      CIF dictionary      Interpreting this report

### Datablock: EB52RT

---

|                                |                          |                                   |
|--------------------------------|--------------------------|-----------------------------------|
| Bond precision:                | C-C = 0.0034 A           | Wavelength=0.62000                |
| Cell:                          | a=12.186(2)              | b=12.335(2)      c=13.003(3)      |
|                                | alpha=83.54(3)           | beta=81.05(3)      gamma=88.43(3) |
| Temperature:                   | 298 K                    |                                   |
|                                | Calculated               | Reported                          |
| Volume                         | 1918.4(7)                | 1918.6(7)                         |
| Space group                    | P -1                     | P -1                              |
| Hall group                     | -P 1                     | -P 1                              |
| Moiety formula                 | C41 H43 N O3 P Pd, Cl O4 | C41 H43 N O3 P Pd, Cl O4          |
| Sum formula                    | C41 H43 Cl N O7 P Pd     | C41 H43 Cl N O7 P Pd              |
| Mr                             | 834.58                   | 834.58                            |
| Dx, g cm <sup>-3</sup>         | 1.445                    | 1.445                             |
| Z                              | 2                        | 2                                 |
| Mu (mm <sup>-1</sup> )         | 0.444                    | 0.444                             |
| F000                           | 860.0                    | 860.0                             |
| F000'                          | 857.84                   |                                   |
| h, k, lmax                     |                          | 18, 19, 20                        |
| Nref                           |                          | 16038                             |
| Tmin, Tmax                     | 0.974, 0.991             |                                   |
| Tmin'                          | 0.957                    |                                   |
| Correction method=             | Not given                |                                   |
| Data completeness=             |                          | Theta(max)= 31.096                |
| R(reflections)= 0.0405( 14298) |                          | wR2(reflections)= 0.1263( 16038)  |
| S = 1.042                      | Npar= 569                |                                   |

---

The following ALERTS were generated. Each ALERT has the format

**test-name\_ALERT\_alert-type\_alert-level.**

Click on the hyperlinks for more details of the test.

---

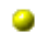

### Alert level C

|                   |         |           |                                   |       |             |    |     |    |    |     |    |    |     |    |    |     |    |    |
|-------------------|---------|-----------|-----------------------------------|-------|-------------|----|-----|----|----|-----|----|----|-----|----|----|-----|----|----|
| PLAT241_ALERT_2_C | High    | 'MainMol' | Ueq as Compared to Neighbors of   | C2_3  | Check       |    |     |    |    |     |    |    |     |    |    |     |    |    |
| PLAT242_ALERT_2_C | Low     | 'MainMol' | Ueq as Compared to Neighbors of   | Pd_1  | Check       |    |     |    |    |     |    |    |     |    |    |     |    |    |
| PLAT242_ALERT_2_C | Low     | 'MainMol' | Ueq as Compared to Neighbors of   | C1_2  | Check       |    |     |    |    |     |    |    |     |    |    |     |    |    |
| PLAT260_ALERT_2_C | Large   | Average   | Ueq of Residue Including          | ClA_5 | 0.240 Check |    |     |    |    |     |    |    |     |    |    |     |    |    |
| PLAT260_ALERT_2_C | Large   | Average   | Ueq of Residue Including          | ClB_5 | 0.261 Check |    |     |    |    |     |    |    |     |    |    |     |    |    |
| PLAT906_ALERT_3_C | Large   | K Value   | in the Analysis of Variance ..... | 2.159 | Check       |    |     |    |    |     |    |    |     |    |    |     |    |    |
| PLAT911_ALERT_3_C | Missing | FCF Refl  | Between Thmin & STh/L=            | 0.600 | 138 Report  |    |     |    |    |     |    |    |     |    |    |     |    |    |
|                   | 11      | 0         | 0,                                | 12    | 0           | 0, | 13  | 0  | 0, | 14  | 0  | 0, | -14 | 1  | 0, | -13 | 1  | 0, |
|                   | -12     | 1         | 0,                                | -11   | 1           | 0, | -10 | 1  | 0, | -9  | 1  | 0, | -4  | 1  | 0, | 0   | 1  | 0, |
|                   | 6       | 1         | 0,                                | 13    | 1           | 0, | 14  | 1  | 0, | -14 | 2  | 0, | -13 | 2  | 0, | -12 | 2  | 0, |
|                   | -11     | 2         | 0,                                | -10   | 2           | 0, | -9  | 2  | 0, | -6  | 2  | 0, | 14  | 2  | 0, | -14 | 3  | 0, |
|                   | -13     | 3         | 0,                                | -12   | 3           | 0, | -11 | 3  | 0, | -10 | 3  | 0, | -13 | 4  | 0, | -12 | 4  | 0, |
|                   | -11     | 4         | 0,                                | -13   | 5           | 0, | -12 | 5  | 0, | -5  | 5  | 0, | 1   | 5  | 0, | -13 | 6  | 0, |
|                   | 1       | 10        | 0,                                | -2    | -6          | 1, | 3   | -6 | 1, | 4   | -4 | 1, | 13  | -4 | 1, | 13  | -3 | 1, |
|                   | 14      | -3        | 1,                                | -14   | -2          | 1, | -13 | -2 | 1, | 8   | -2 | 1, | 12  | -2 | 1, | 13  | -2 | 1, |
|                   | 14      | -2        | 1,                                | -14   | -1          | 1, | -13 | -1 | 1, | -12 | -1 | 1, | -11 | -1 | 1, | 13  | -1 | 1, |
|                   | 14      | -1        | 1,                                | -14   | 0           | 1, | -13 | 0  | 1, | -12 | 0  | 1, | -11 | 0  | 1, | -10 | 0  | 1, |
|                   | -9      | 0         | 1,                                | -8    | 0           | 1, | 5   | 0  | 1, | 13  | 0  | 1, | 14  | 0  | 1, | -14 | 1  | 1, |
|                   | -13     | 1         | 1,                                | -12   | 1           | 1, | -11 | 1  | 1, | -10 | 1  | 1, | -9  | 1  | 1, | -8  | 1  | 1, |
|                   | -14     | 2         | 1,                                | -13   | 2           | 1, | -12 | 2  | 1, | -11 | 2  | 1, | -10 | 2  | 1, | -9  | 2  | 1, |
|                   | -13     | 3         | 1,                                | -12   | 3           | 1, | -11 | 3  | 1, | -10 | 3  | 1, | -13 | 4  | 1, | -12 | 4  | 1, |
|                   | -11     | 4         | 1,                                | -13   | 5           | 1, | -12 | 5  | 1, | 3   | -5 | 2, | -13 | -2 | 2, | -1  | -2 | 2, |
|                   | -13     | -1        | 2,                                | -12   | -1          | 2, | -11 | -1 | 2, | -6  | -1 | 2, | 0   | -1 | 2, | -14 | 0  | 2, |

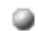

### Alert level G

|                   |                                                    |              |
|-------------------|----------------------------------------------------|--------------|
| ABSMU01_ALERT_1_G | Calculation of _exptl_absorpt_correction_mu        |              |
|                   | not performed for this radiation type.             |              |
| PLAT002_ALERT_2_G | Number of Distance or Angle Restrictions on AtSite | 27 Note      |
| PLAT003_ALERT_2_G | Number of Uiso or Uij Restrained non-H Atoms ...   | 2 Report     |
| PLAT092_ALERT_4_G | Check: Wavelength Given is not Cu,Ga,Mo,Ag,In Ka   | 0.62000 Ang. |
| PLAT154_ALERT_1_G | The s.u.'s on the Cell Angles are Equal ..(Note)   | 0.03 Degree  |
| PLAT175_ALERT_4_G | The CIF-Embedded .res File Contains SAME Records   | 2 Report     |
| PLAT176_ALERT_4_G | The CIF-Embedded .res File Contains SADI Records   | 4 Report     |
| PLAT177_ALERT_4_G | The CIF-Embedded .res File Contains DELU Records   | 1 Report     |
| PLAT232_ALERT_2_G | Hirshfeld Test Diff (M-X) Pd_1 --C_2               | 8.4 s.u.     |
| PLAT301_ALERT_3_G | Main Residue Disorder .....(Resd 1 )               | 17% Note     |
| PLAT302_ALERT_4_G | Anion/Solvent/Minor-Residue Disorder (Resd 2 )     | 100% Note    |
| PLAT302_ALERT_4_G | Anion/Solvent/Minor-Residue Disorder (Resd 3 )     | 100% Note    |
| PLAT304_ALERT_4_G | Non-Integer Number of Atoms in ..... (Resd 2 )     | 3.47 Check   |
| PLAT304_ALERT_4_G | Non-Integer Number of Atoms in ..... (Resd 3 )     | 1.54 Check   |
| PLAT410_ALERT_2_G | Short Intra H...H Contact H3_3 ..H8A_4             | 2.14 Ang.    |
|                   | x,y,z =                                            | 1_555 Check  |
| PLAT720_ALERT_4_G | Number of Unusual/Non-Standard Labels .....        | 115 Note     |
|                   | Pd_1 N_2 C_2 C1_2 C2_2 H2A_2 H2B_2 C3_2            |              |
|                   | H3A_2 H3B_2 C4_2 H4A_2 H4B_2 C5_2 H5_2 C6_2        |              |
|                   | H6A_2 H6B_2 C7_2 H7_2 C8_2 H8A_2 H8B_2 C9_2        |              |
|                   | H9_2 C10_2 H10A_2 H10B_2 C1A_5 O1A_5 O2A_5         |              |
|                   | O4A_5 C1B_5 O1B_5 O2B_5 O3B_5 O4B_5 C4_3 H4_3      |              |
|                   | C5_3 H5_3 C6_3 H6_3 C9_3 C3_3 H3_3 C8_3            |              |

|                                                                    |        |       |       |        |        |        |           |
|--------------------------------------------------------------------|--------|-------|-------|--------|--------|--------|-----------|
| C7_3                                                               | H7_3   | C1_3  | H1_3  | C2_3   | H2_3   | P_4    | C1_4      |
| C6_4                                                               | H6_4   | C5_4  | H5_4  | C4_4   | C3_4   | H3_4   | C2_4      |
| H2_4                                                               | C13_4  | C14_4 | H14_4 | C15_4  | H15_4  | C16_4  | C17_4     |
| H17_4                                                              | C18_4  | H18_4 | Oa_4  | Ca_4   | Ha1_4  | Ha2_4  | Ha3_4     |
| Oc_4                                                               | Cc_4   | Hc1_4 | Hc2_4 | Hc3_4  | C12A_4 | H12A_4 | C11A_4    |
| H11A_4                                                             | C10A_4 | C9A_4 | H9A_4 | C8A_4  | H8A_4  | C7A_4  | ObA_4     |
| CbA_4                                                              | Hb1_4  | Hb2_4 | Hb3_4 | C12B_4 | H12B_4 | C11B_4 | H11B_4    |
| C10B_4                                                             | C9B_4  | H9B_4 | C8B_4 | H8B_4  | C7B_4  | ObB_4  | CbB_4     |
| Hb4_4                                                              | Hb5_4  | Hb6_4 |       |        |        |        |           |
| PLAT860_ALERT_3_G Number of Least-Squares Restraints .....         |        |       |       |        |        |        | 74 Note   |
| PLAT912_ALERT_4_G Missing # of FCF Reflections Above STh/L= 0.600  |        |       |       |        |        |        | 2051 Note |
| PLAT933_ALERT_2_G Number of HKL-OMIT Records in Embedded .res File |        |       |       |        |        |        | 10 Note   |
| -6 2 0, 5 -3 3, 3 -6 1, 1 3 2, -1 -2 2, 1 -4 3,                    |        |       |       |        |        |        |           |
| 4 -4 1, 3 -3 3, 5 0 1, -4 1 0,                                     |        |       |       |        |        |        |           |
| PLAT950_ALERT_5_G Calculated (ThMax) and CIF-Reported Hmax Differ  |        |       |       |        |        |        | 2 Units   |
| PLAT956_ALERT_1_G Calculated (ThMax) and Actual (FCF) Hmax Differ  |        |       |       |        |        |        | 2 Units   |
| PLAT978_ALERT_2_G Number C-C Bonds with Positive Residual Density. |        |       |       |        |        |        | 10 Info   |
| PLAT992_ALERT_5_G Repd & Actual _reflns_number_gt Values Differ by |        |       |       |        |        |        | 7 Check   |

---

0 **ALERT level A** = Most likely a serious problem - resolve or explain  
 0 **ALERT level B** = A potentially serious problem, consider carefully  
 7 **ALERT level C** = Check. Ensure it is not caused by an omission or oversight  
 23 **ALERT level G** = General information/check it is not something unexpected

3 ALERT type 1 CIF construction/syntax error, inconsistent or missing data  
 11 ALERT type 2 Indicator that the structure model may be wrong or deficient  
 4 ALERT type 3 Indicator that the structure quality may be low  
 10 ALERT type 4 Improvement, methodology, query or suggestion  
 2 ALERT type 5 Informative message, check

---

It is advisable to attempt to resolve as many as possible of the alerts in all categories. Often the minor alerts point to easily fixed oversights, errors and omissions in your CIF or refinement strategy, so attention to these fine details can be worthwhile. In order to resolve some of the more serious problems it may be necessary to carry out additional measurements or structure refinements. However, the purpose of your study may justify the reported deviations and the more serious of these should normally be commented upon in the discussion or experimental section of a paper or in the "special\_details" fields of the CIF. checkCIF was carefully designed to identify outliers and unusual parameters, but every test has its limitations and alerts that are not important in a particular case may appear. Conversely, the absence of alerts does not guarantee there are no aspects of the results needing attention. It is up to the individual to critically assess their own results and, if necessary, seek expert advice.

### **Publication of your CIF in IUCr journals**

A basic structural check has been run on your CIF. These basic checks will be run on all CIFs submitted for publication in IUCr journals (*Acta Crystallographica*, *Journal of Applied Crystallography*, *Journal of Synchrotron Radiation*); however, if you intend to submit to *Acta Crystallographica Section C* or *E* or *IUCrData*, you should make sure that full publication checks are run on the final version of your CIF prior to submission.

### **Publication of your CIF in other journals**

Please refer to the *Notes for Authors* of the relevant journal for any special instructions relating to CIF submission.

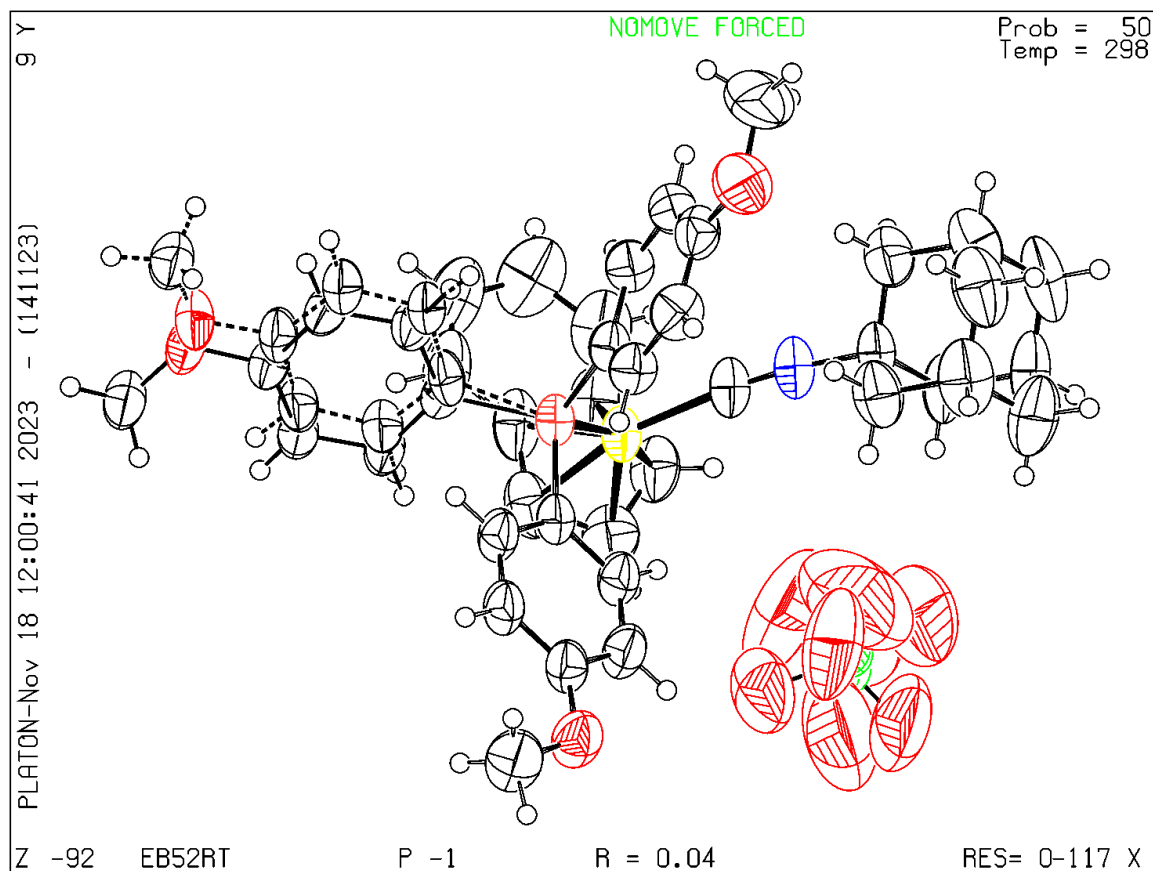

Supplement: s1 [file s1]
