# Supplementary material for: Rational Design of Palladium(II) Indenyl and Allyl Complexes Bearing Phosphine and Isocyanide Ancillary Ligands with Promising Antitumor Activity
Source: MDPI journal article supplement (doi:10.3390/molecules29020345), 2024-01-10

## checkCIF/PLATON report

Structure factors have been supplied for datablock(s) EB6x

THIS REPORT IS FOR GUIDANCE ONLY. IF USED AS PART OF A REVIEW PROCEDURE FOR PUBLICATION, IT SHOULD NOT REPLACE THE EXPERTISE OF AN EXPERIENCED CRYSTALLOGRAPHIC REFEREE.

No syntax errors found.      CIF dictionary      Interpreting this report

### Datablock: EB6x

---

|                        |                       |                                |
|------------------------|-----------------------|--------------------------------|
| Bond precision:        | C-C = 0.0079 Å        | Wavelength=0.62000             |
| Cell:                  | a=14.982 (3)          | b=13.237 (3)      c=16.829 (3) |
|                        | alpha=90              | beta=112.78 (3)      gamma=90  |
| Temperature:           | 100 K                 |                                |
|                        | Calculated            | Reported                       |
| Volume                 | 3077.1 (13)           | 3077.2 (12)                    |
| Space group            | P 21/c                | P 21/c                         |
| Hall group             | -P 2ybc               | -P 2ybc                        |
| Moiety formula         | C34 H33 N P Pd, Cl O4 | C34 H33 N P Pd, Cl O4          |
| Sum formula            | C34 H33 Cl N O4 P Pd  | C34 H33 Cl N O4 P Pd           |
| Mr                     | 692.43                | 692.43                         |
| Dx, g cm <sup>-3</sup> | 1.495                 | 1.495                          |
| Z                      | 4                     | 4                              |
| Mu (mm <sup>-1</sup> ) | 0.535                 | 0.535                          |
| F000                   | 1416.0                | 1416.0                         |
| F000'                  | 1411.57               |                                |
| h, k, lmax             |                       | 24, 21, 28                     |
| Nref                   |                       | 13007                          |
| Tmin, Tmax             | 0.968, 0.989          |                                |
| Tmin'                  | 0.948                 |                                |

Correction method= Not given

Data completeness=      Theta(max)= 31.103

R(reflections)= 0.0746 ( 11398)

wR2(reflections)=  
0.2458 ( 13007)

S = 1.138

Npar= 409

---

The following ALERTS were generated. Each ALERT has the format

**test-name\_ALERT\_alert-type\_alert-level.**

Click on the hyperlinks for more details of the test.

---

### ● Alert level C

DIFMN02\_ALERT\_2\_C The minimum difference density is < -0.1\*ZMAX\*0.75

\_refine\_diff\_density\_min given = -4.082

Test value = -3.450

DIFMN03\_ALERT\_1\_C The minimum difference density is < -0.1\*ZMAX\*0.75

The relevant atom site should be identified.

PLAT029\_ALERT\_3\_C \_diffrn\_measured\_fraction\_theta\_full value Low . 0.967 Why?  
PLAT098\_ALERT\_2\_C Large Reported Min. (Negative) Residual Density -4.08 eA-3  
PLAT213\_ALERT\_2\_C Atom C4\_4 has ADP max/min Ratio ..... 3.3 prolat  
PLAT213\_ALERT\_2\_C Atom C16\_4 has ADP max/min Ratio ..... 3.5 prolat  
PLAT213\_ALERT\_2\_C Atom C17\_4 has ADP max/min Ratio ..... 3.1 prolat  
PLAT213\_ALERT\_2\_C Atom C1A\_2 has ADP max/min Ratio ..... 3.5 prolat  
PLAT220\_ALERT\_2\_C NonSolvent Resd 1 C Ueq(max)/Ueq(min) Range 3.5 Ratio  
PLAT244\_ALERT\_4\_C Low 'Solvent' Ueq as Compared to Neighbors of C1\_5 Check  
PLAT906\_ALERT\_3\_C Large K Value in the Analysis of Variance ..... 2.512 Check  
PLAT911\_ALERT\_3\_C Missing FCF Refl Between Thmin & STh/L= 0.600 185 Report  
2 2 0, 3 0 0, 3 1 0, 3 3 0, 5 0 0, 5 3 0,  
5 4 0, 6 0 0, 6 5 0, 7 6 0, 8 0 0, 8 1 0,  
8 6 0, 9 0 0, 10 0 0, 10 1 0, 10 6 0, 11 0 0,  
11 1 0, 12 0 0, 12 1 0, 12 2 0, 12 3 0, 12 4 0,  
13 6 0, 14 0 0, 14 1 0, 14 2 0, 14 7 0, 15 2 0,  
16 0 0, 16 1 0, 16 3 0, 5 0 2, 13 3 2, -11 3 3,  
-8 5 3, -7 3 3, -6 1 3, -6 3 3, -6 14 3, -5 2 3,  
-5 4 3, -5 10 3, -4 2 3, -4 5 3, -4 13 3, -3 2 3,  
-3 3 3, -3 9 3, -3 10 3, -2 8 3, -2 10 3, 0 1 3,  
0 3 3, 0 6 3, 0 7 3, 1 7 3, 2 4 3, 2 15 3,  
3 3 3, 3 5 3, 3 9 3, 4 4 3, 4 5 3, 4 9 3,  
5 2 3, 5 8 3, 5 10 3, 6 8 3, 6 12 3, 7 8 3,  
7 9 3, -6 4 4, 0 0 4, -5 3 5, 1 9 5, 2 5 5,  
4 9 5, -6 11 6, -3 15 6, 8 0 6, 12 0 6, -5 9 7,  
-3 14 7, -17 3 8, -16 0 8, -16 1 8, -14 3 8, -12 0 8,  
-10 0 8, -9 12 8, -8 8 8, -7 0 8, -7 12 8, 1 7 8,  
PLAT918\_ALERT\_3\_C Reflection(s) with I(obs) much Smaller I(calc) . 4 Check

---

### ● Alert level G

ABSMU01\_ALERT\_1\_G Calculation of \_exptl\_absorpt\_correction\_mu

not performed for this radiation type.

PLAT002\_ALERT\_2\_G Number of Distance or Angle Restraints on AtSite 16 Note  
PLAT003\_ALERT\_2\_G Number of Uiso or Uij Restrained non-H Atoms ... 5 Report  
PLAT083\_ALERT\_2\_G SHELXL Second Parameter in WGHT Unusually Large 9.70 Why ?  
PLAT092\_ALERT\_4\_G Check: Wavelength Given is not Cu,Ga,Mo,Ag,In Ka 0.62000 Ang.  
PLAT168\_ALERT\_4\_G The CIF-Embedded .res File Contains EXYZ Records 1 Report  
PLAT171\_ALERT\_4\_G The CIF-Embedded .res File Contains EADP Records 1 Report  
PLAT172\_ALERT\_4\_G The CIF-Embedded .res File Contains DFIX Records 2 Report  
PLAT173\_ALERT\_4\_G The CIF-Embedded .res File Contains DANG Records 1 Report  
PLAT175\_ALERT\_4\_G The CIF-Embedded .res File Contains SAME Records 1 Report  
PLAT176\_ALERT\_4\_G The CIF-Embedded .res File Contains SADI Records 2 Report  
PLAT178\_ALERT\_4\_G The CIF-Embedded .res File Contains SIMU Records 1 Report  
PLAT301\_ALERT\_3\_G Main Residue Disorder .....(Resd 1 ) 22% Note  
PLAT720\_ALERT\_4\_G Number of Unusual/Non-Standard Labels ..... 94 Note

|                                                                    |       |       |       |       |       |       |       |              |
|--------------------------------------------------------------------|-------|-------|-------|-------|-------|-------|-------|--------------|
| O4_5                                                               | C1_5  | O1_5  | O3_5  | O2_5  | Pd_1  | C4_3  | H4_3  |              |
| C5_3                                                               | H5_3  | C6_3  | H6_3  | C9_3  | C3_3  | H3_3  | C8_3  |              |
| C7_3                                                               | H7_3  | C1_3  | H1_3  | C2_3  | H2_3  | P_4   | C12_4 |              |
| H12_4                                                              | C11_4 | H11_4 | C10_4 | H10_4 | C9_4  | H9_4  | C8_4  |              |
| H8_4                                                               | C7_4  | C1_4  | C6_4  | H6_4  | C5_4  | H5_4  | C4_4  |              |
| H4_4                                                               | C3_4  | H3_4  | C2_4  | H2_4  | C13_4 | C14_4 | H14_4 |              |
| C15_4                                                              | H15_4 | C16_4 | H16_4 | C17_4 | H17_4 | C18_4 | H18_4 |              |
| C1A_2                                                              | H1A_2 | C2A_2 | H2A_2 | H2B_2 | C3A_2 | H3A_2 | H3B_2 |              |
| C4A_2                                                              | H4A_2 | H4B_2 | C5A_2 | H5A_2 | H5B_2 | C6A_2 | H6A_2 |              |
| H6B_2                                                              | Na_2  | Ca_2  | C1B_2 | H1B_2 | C2B_2 | H2C_2 | H2D_2 |              |
| C3B_2                                                              | H3C_2 | H3D_2 | C4B_2 | H4C_2 | H4D_2 | C5B_2 | H5C_2 |              |
| H5D_2                                                              | C6B_2 | H6C_2 | H6D_2 | Nb_2  | Cb_2  |       |       |              |
| PLAT790_ALERT_4_G Centre of Gravity not Within Unit Cell: Resd. #  |       |       |       |       |       |       |       | 2 Note       |
| C1 O4                                                              |       |       |       |       |       |       |       |              |
| PLAT860_ALERT_3_G Number of Least-Squares Restraints .....         |       |       |       |       |       |       |       | 67 Note      |
| PLAT870_ALERT_4_G ALERTS Related to Twinning Effects Suppressed .. |       |       |       |       |       |       |       | ! Info       |
| PLAT910_ALERT_3_G Missing # of FCF Reflection(s) Below Theta(Min). |       |       |       |       |       |       |       | 1 Note       |
| 1 0 0,                                                             |       |       |       |       |       |       |       |              |
| PLAT912_ALERT_4_G Missing # of FCF Reflections Above STh/L= 0.600  |       |       |       |       |       |       |       | 1691 Note    |
| PLAT913_ALERT_3_G Missing # of Very Strong Reflections in FCF .... |       |       |       |       |       |       |       | 2 Note       |
| 3 0 0, 0 0 4,                                                      |       |       |       |       |       |       |       |              |
| PLAT931_ALERT_5_G CIFcalcFCF Twin Law ( 1 0 0) Est.d BASF          |       |       |       |       |       |       |       | 0.25 Check   |
| PLAT933_ALERT_2_G Number of HKL-OMIT Records in Embedded .res File |       |       |       |       |       |       |       | 23 Note      |
| -3 6 10, -1 13 10, -3 9 3, -1 0 16, -3 12 10, -5 10 3,             |       |       |       |       |       |       |       |              |
| -3 3 3, -3 10 10, -3 14 10, -6 0 16, -1 11 10, -8 0 18,            |       |       |       |       |       |       |       |              |
| 0 7 3, -6 2 13, 0 1 3, 3 9 3, 2 7 16, 5 2 3,                       |       |       |       |       |       |       |       |              |
| -4 13 10, -4 13 3, -2 2 13, -4 1 13, -2 4 13,                      |       |       |       |       |       |       |       |              |
| PLAT941_ALERT_3_G Average HKL Measurement Multiplicity .....       |       |       |       |       |       |       |       | 1.0 Low      |
| PLAT965_ALERT_2_G The SHELXL WEIGHT Optimisation has not Converged |       |       |       |       |       |       |       | Please Check |
| PLAT992_ALERT_5_G Repd & Actual _reflns_number_gt Values Differ by |       |       |       |       |       |       |       | 4 Check      |

- 
- 0 **ALERT level A** = Most likely a serious problem - resolve or explain  
 0 **ALERT level B** = A potentially serious problem, consider carefully  
 13 **ALERT level C** = Check. Ensure it is not caused by an omission or oversight  
 25 **ALERT level G** = General information/check it is not something unexpected
- 2 ALERT type 1 CIF construction/syntax error, inconsistent or missing data  
 12 ALERT type 2 Indicator that the structure model may be wrong or deficient  
 9 ALERT type 3 Indicator that the structure quality may be low  
 13 ALERT type 4 Improvement, methodology, query or suggestion  
 2 ALERT type 5 Informative message, check
- 
-

It is advisable to attempt to resolve as many as possible of the alerts in all categories. Often the minor alerts point to easily fixed oversights, errors and omissions in your CIF or refinement strategy, so attention to these fine details can be worthwhile. In order to resolve some of the more serious problems it may be necessary to carry out additional measurements or structure refinements. However, the purpose of your study may justify the reported deviations and the more serious of these should normally be commented upon in the discussion or experimental section of a paper or in the "special\_details" fields of the CIF. checkCIF was carefully designed to identify outliers and unusual parameters, but every test has its limitations and alerts that are not important in a particular case may appear. Conversely, the absence of alerts does not guarantee there are no aspects of the results needing attention. It is up to the individual to critically assess their own results and, if necessary, seek expert advice.

### **Publication of your CIF in IUCr journals**

A basic structural check has been run on your CIF. These basic checks will be run on all CIFs submitted for publication in IUCr journals (*Acta Crystallographica*, *Journal of Applied Crystallography*, *Journal of Synchrotron Radiation*); however, if you intend to submit to *Acta Crystallographica Section C* or *E* or *IUCrData*, you should make sure that full publication checks are run on the final version of your CIF prior to submission.

### **Publication of your CIF in other journals**

Please refer to the *Notes for Authors* of the relevant journal for any special instructions relating to CIF submission.

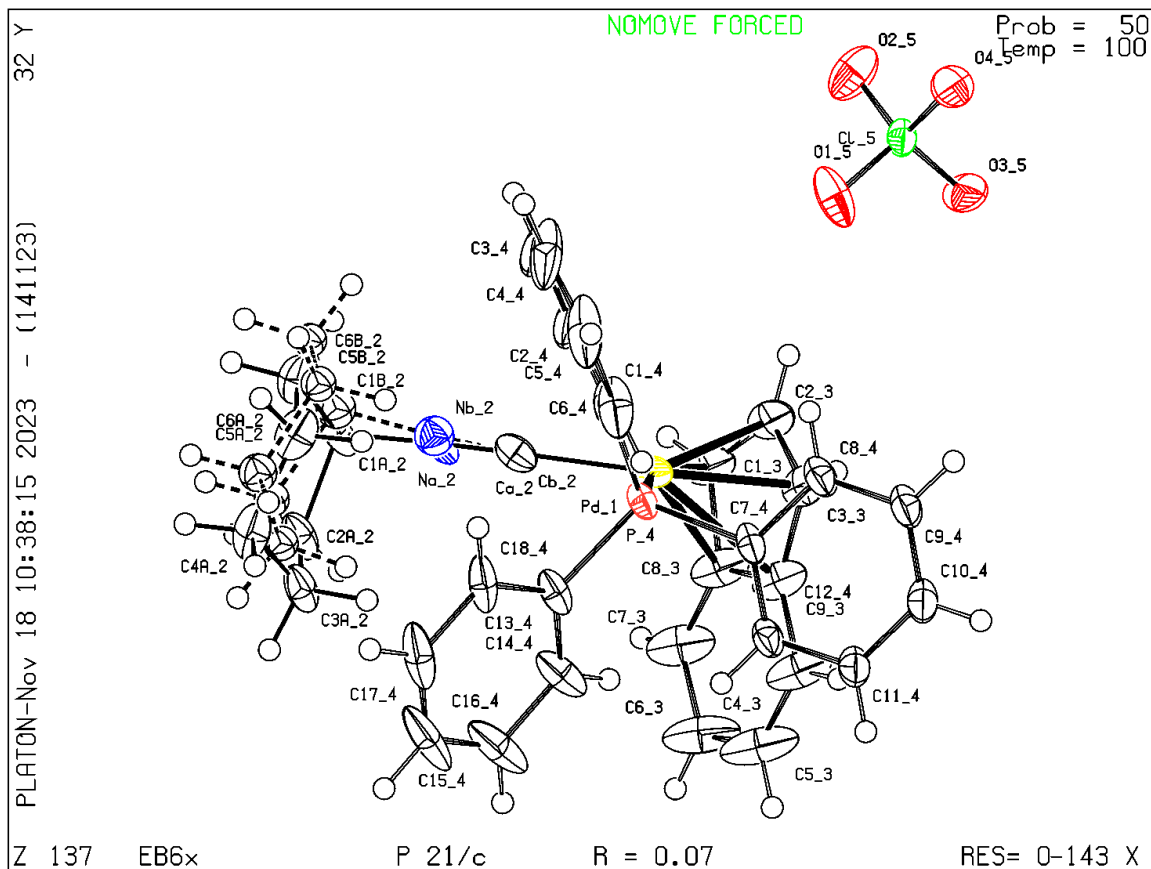

Supplement: s1 [file s1]
