# Supplementary material for: Rational Design of Palladium(II) Indenyl and Allyl Complexes Bearing Phosphine and Isocyanide Ancillary Ligands with Promising Antitumor Activity
Source: MDPI journal article supplement (doi:10.3390/molecules29020345), 2024-01-10
Supplement: s1 [file s1]

# Rational Design of Palladium(II) Indenyl and Allyl Complexes bearing Phosphine and Isocyanide Ancillary Ligands with Promising Antitumor Activity

Enrica Bortolamiol<sup>1</sup>, Eleonora Botter<sup>1</sup>, Enrico Cavarzerani<sup>1</sup>, Matteo Mauceri<sup>1</sup>, Nicola Demitri<sup>2</sup>, Flavio Rizzolio<sup>1,3</sup>, Fabiano Visentin<sup>1\*</sup> and Thomas Scattolin<sup>4\*</sup>

- <sup>1</sup> Department of Molecular Sciences and Nanosystems Università Ca' Foscari Campus Scientifico Via Torino 155, 30174, Venezia-Mestre, Italy: [enrica.bortolamiol@unive.it](mailto:enrica.bortolamiol@unive.it) (E.B); [eleonora.botter@unive.it](mailto:eleonora.botter@unive.it) (E.B); [enrico.cavarzerani@unive.it](mailto:enrico.cavarzerani@unive.it) (E.C.); [matteo.mauceri@unive.it](mailto:matteo.mauceri@unive.it) (M.M.); [flavio.rizzolio@unive.it](mailto:flavio.rizzolio@unive.it)
- <sup>2</sup> Area Science Park Elettra-Sincrotrone Trieste, S.S. 14 Km 163.5 Basovizza, 34149, Trieste, Italy; [nicola.demitri@elettra.eu](mailto:nicola.demitri@elettra.eu) (N.D.)
- <sup>3</sup> Pathology Unit, Department of Molecular Biology and Translational Research Centro di Riferimento Oncologico di Aviano (CRO) IRCCS via Franco Gallini 2, 33081, Aviano, Italy
- <sup>4</sup> Dipartimento di Scienze Chimiche, Università degli Studi di Padova, via Marzolo 1, 35131 Padova, Italy
- \* Correspondence: [thomas.scattolin@unipd.it](mailto:thomas.scattolin@unipd.it) (T.S); [fvis@unive.it](mailto:fvis@unive.it) (F.V.)

## Table of content

|                                                                |    |
|----------------------------------------------------------------|----|
| NMR and IR spectra.....                                        | 3  |
| Hapticity evaluation.....                                      | 34 |
| NMR reactivity data.....                                       | 35 |
| HRMS data .....                                                | 36 |
| Crystal Structure Determination .....                          | 45 |
| X-ray diffraction analysis - Structural characterization ..... | 53 |
| References .....                                               | 58 |



## NMR and IR spectra

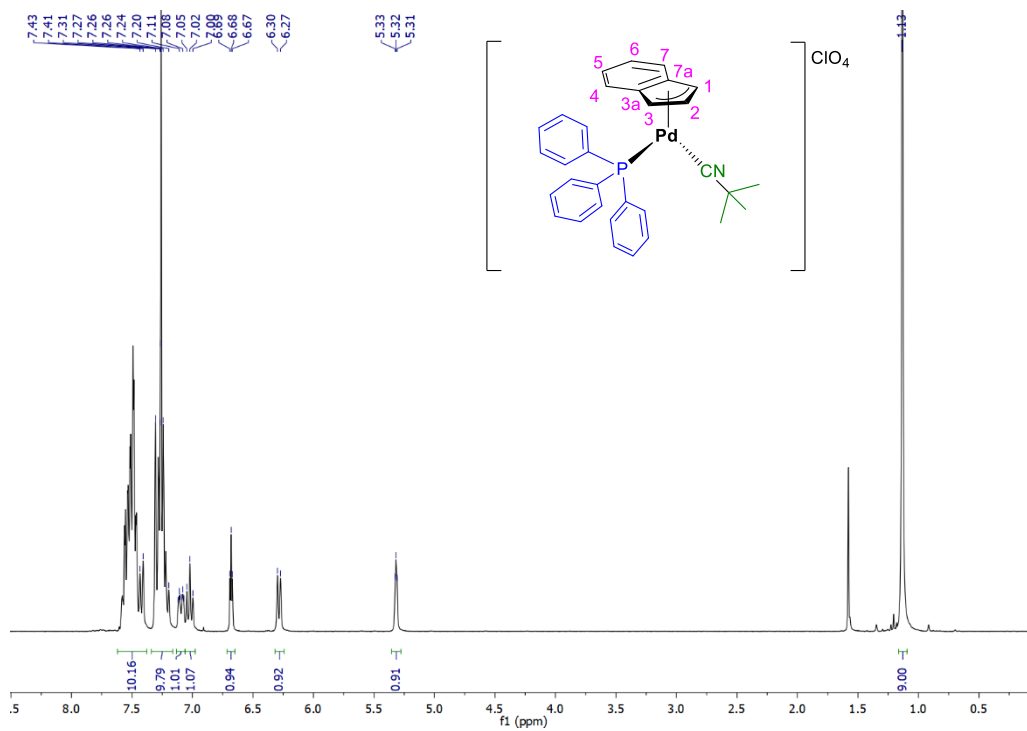

S 1. <sup>1</sup>H NMR spectra of compound **3a-Tic** in CDCl<sub>3</sub> at 298K

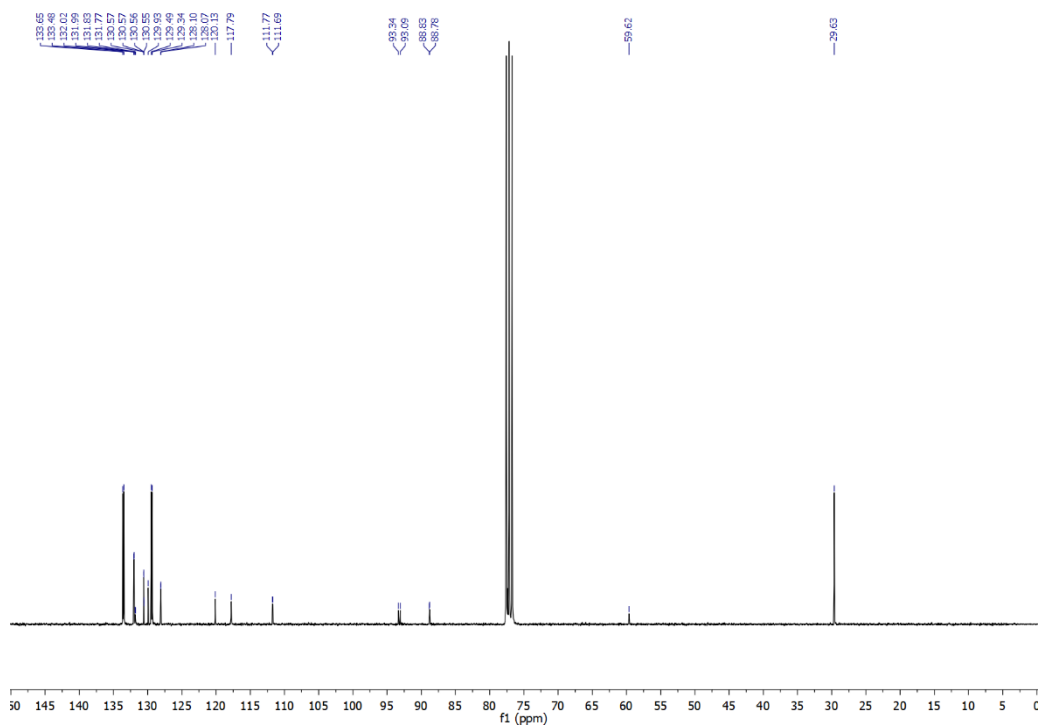

S 2.  $^{13}\text{C}\{^1\text{H}\}$  NMR spectra of compound **3a-Tic** in  $\text{CDCl}_3$  at 298K

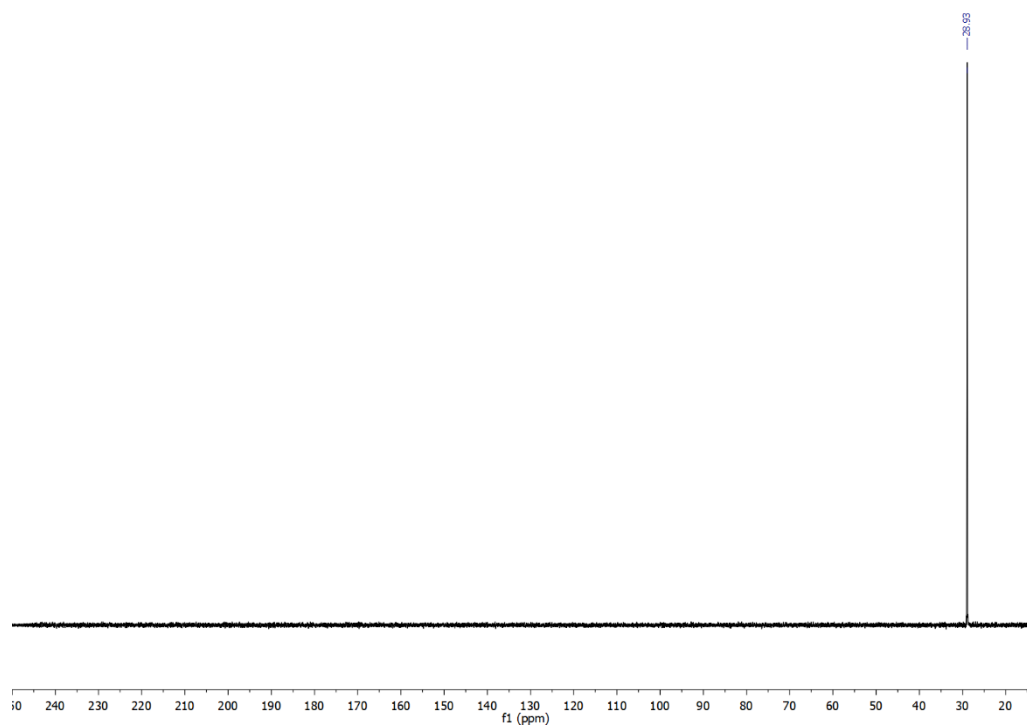

S 3. <sup>31</sup>P{<sup>1</sup>H} NMR spectra of compound **3a-Tic** in CDCl<sub>3</sub> at 298K

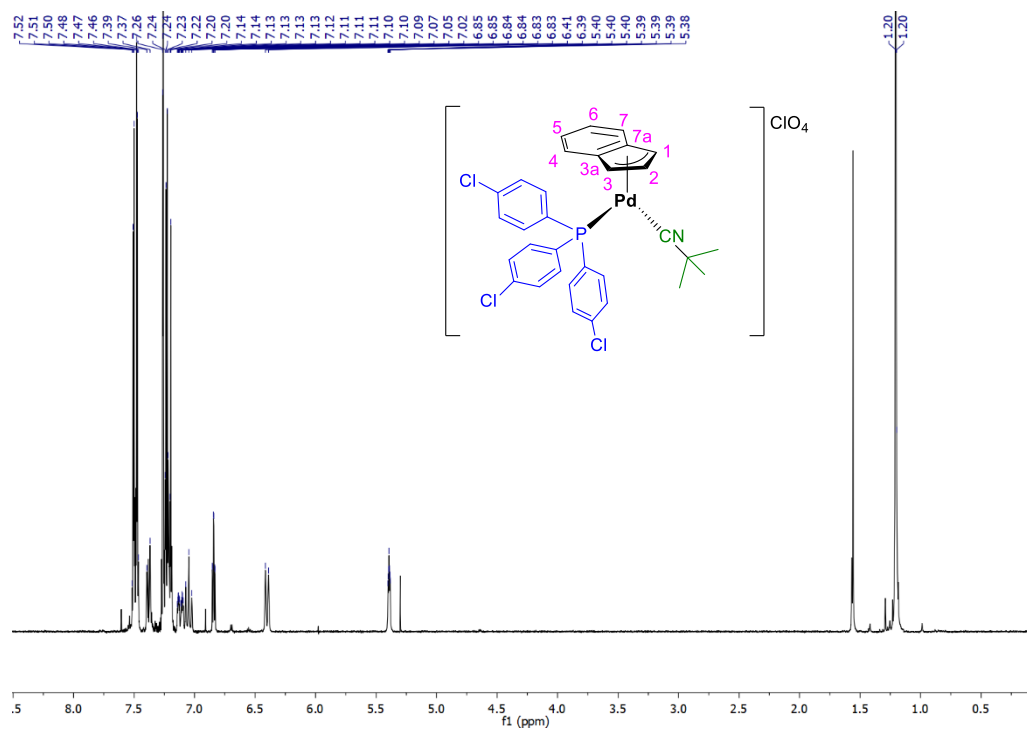

S 4. <sup>1</sup>H NMR spectra of compound **3b-Tic** in CDCl<sub>3</sub> at 298K

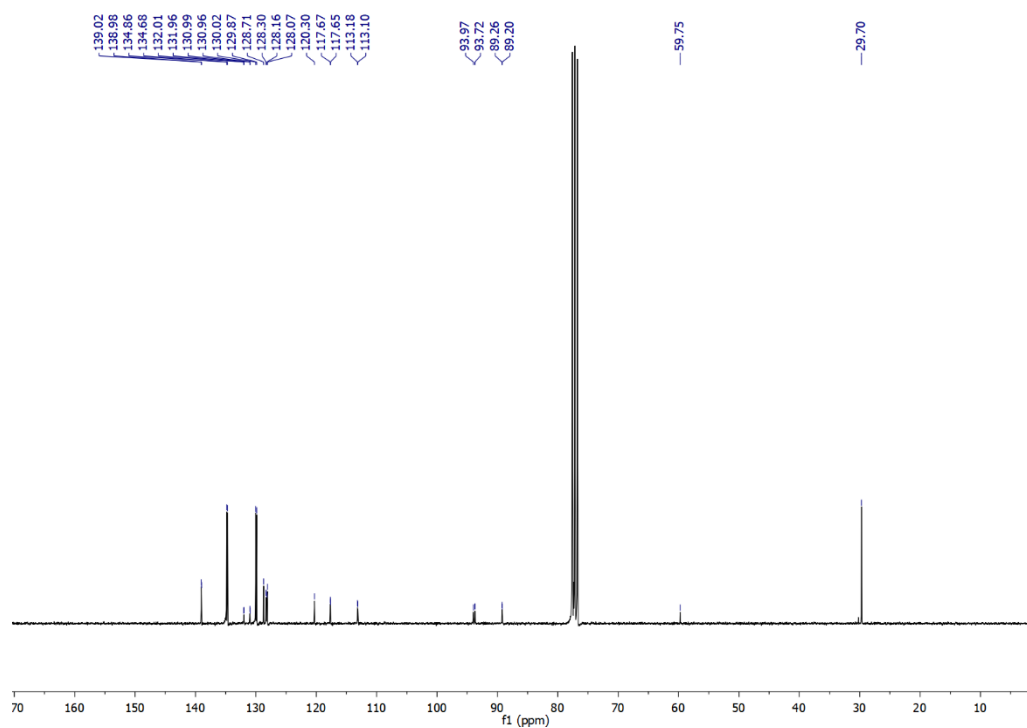

S 5.  $^{13}\text{C}\{^1\text{H}\}$  NMR spectra of compound **3b-Tic** in  $\text{CDCl}_3$  at 298K

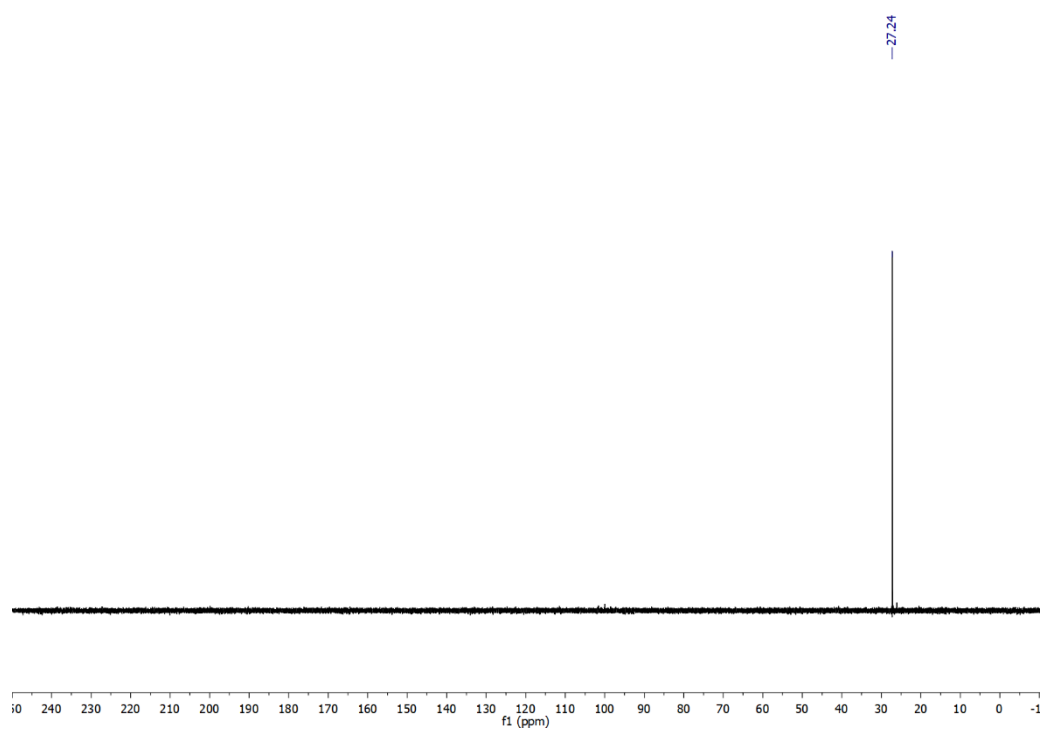

S 6.  $^{31}\text{P}\{^1\text{H}\}$  NMR spectra of compound **3b-Tic** in  $\text{CDCl}_3$  at 298K

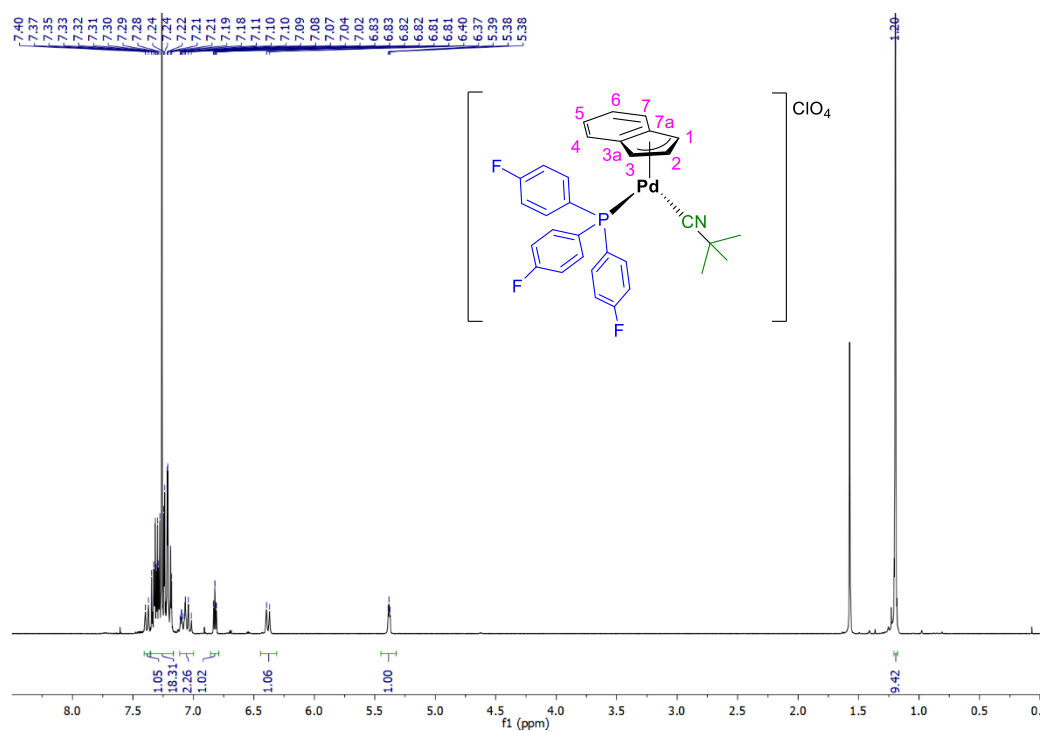

S 7. <sup>1</sup>H NMR spectra of compound **3c-Tic** in CDCl<sub>3</sub> at 298K

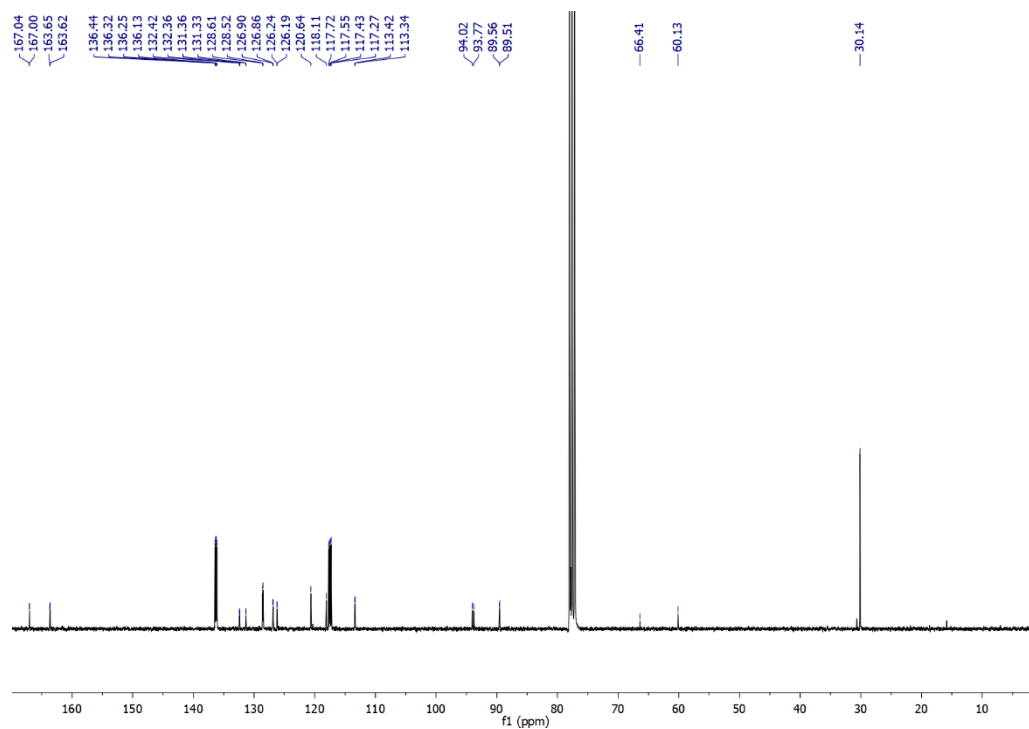

S 8. <sup>13</sup>C[<sup>1</sup>H] NMR spectra of compound **3c-Tic** in CDCl<sub>3</sub> at 298K

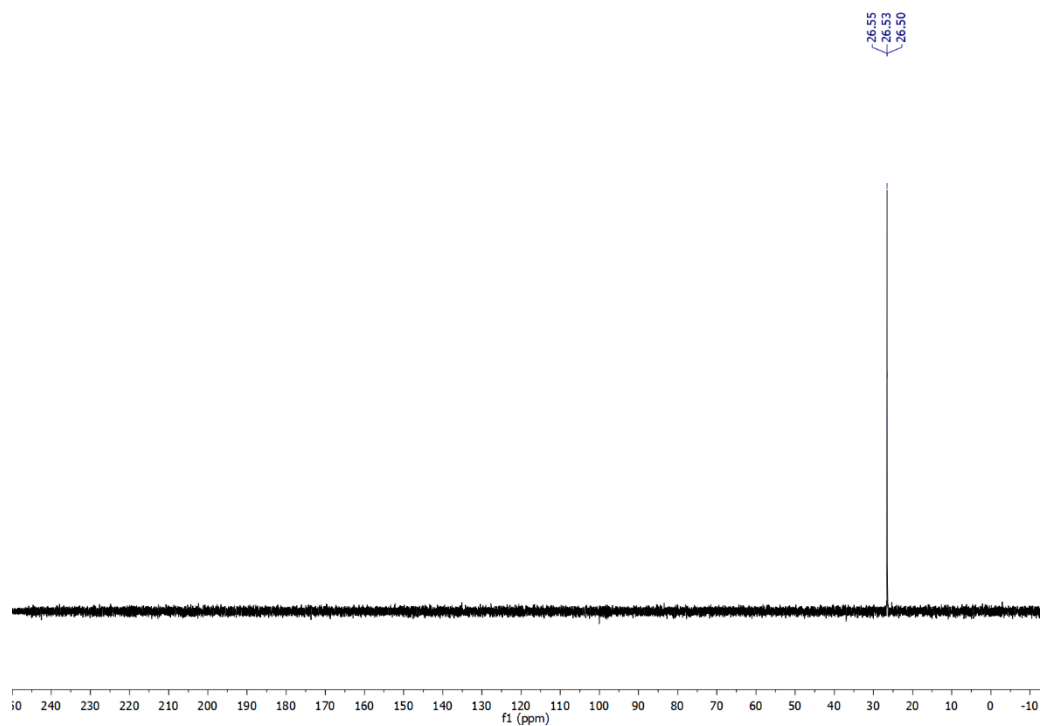

S 9.  $^{31}\text{P}\{^1\text{H}\}$  NMR spectra of compound **3c-Tic** in  $\text{CDCl}_3$  at 298K

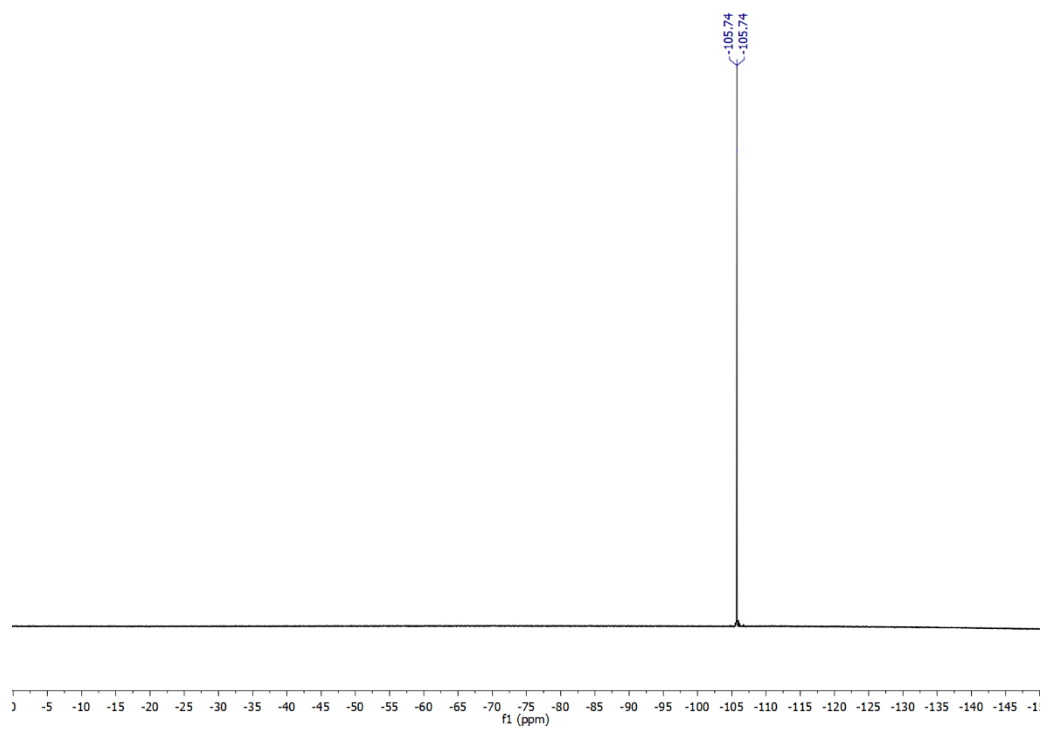

S 10.  $^{91}\text{F}\{^1\text{H}\}$  NMR spectra of compound **3c-Tic** in  $\text{CDCl}_3$  at 298K

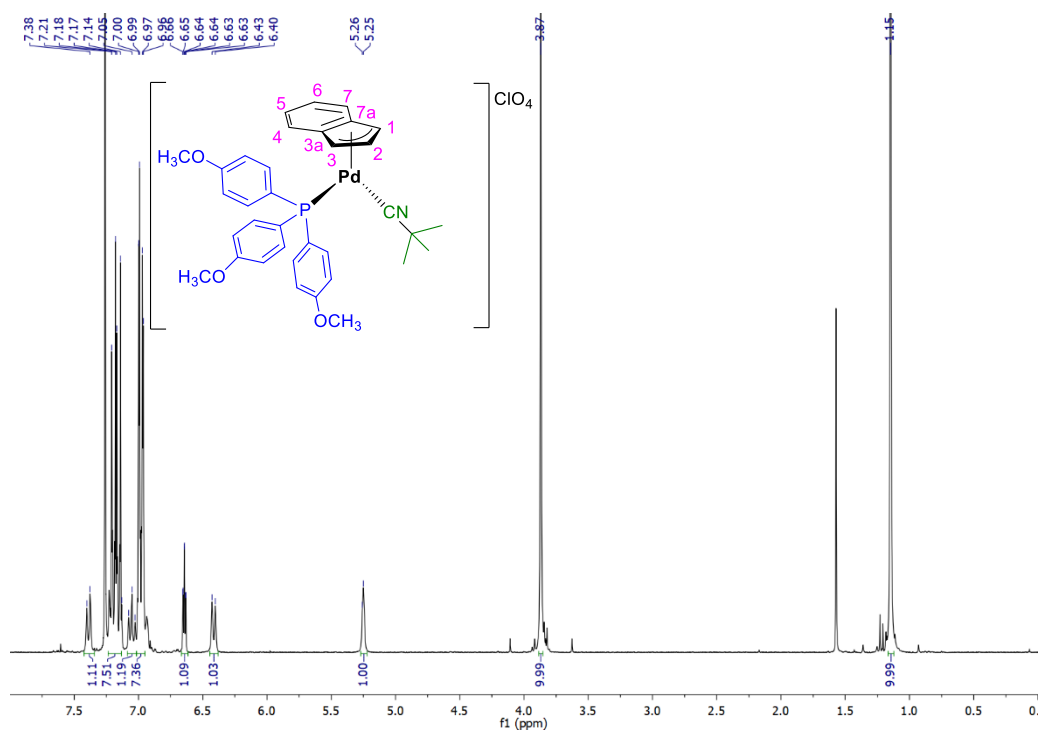

S 11. <sup>1</sup>H NMR spectra of compound **3d-Tic** in CDCl<sub>3</sub> at 298K

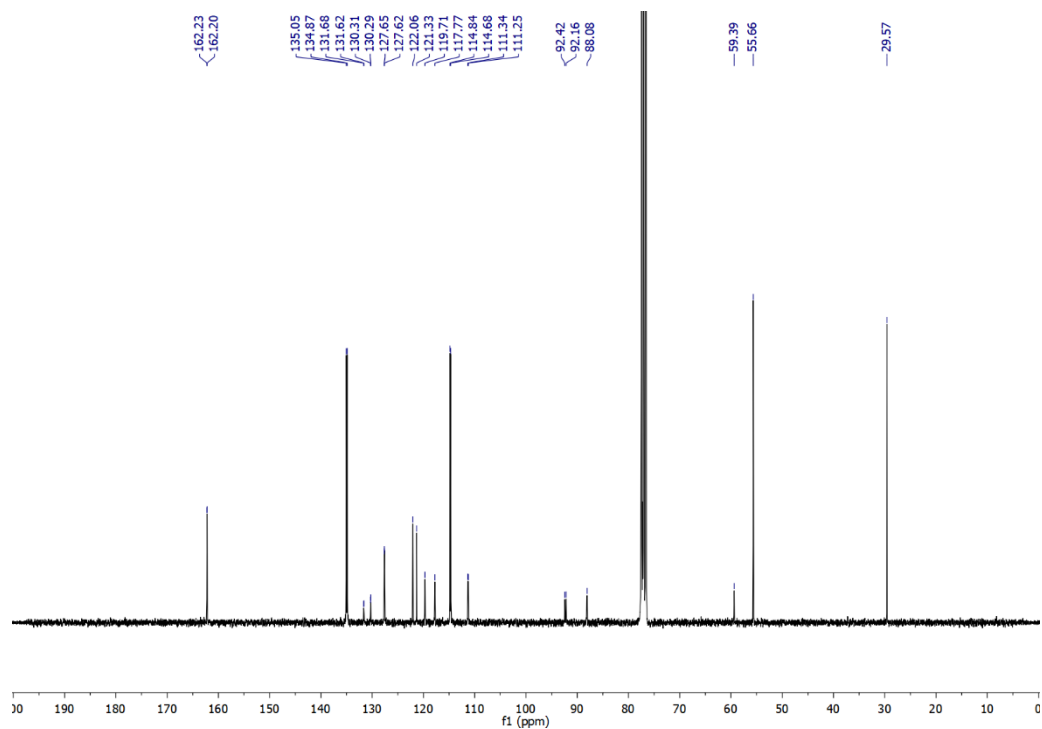

S 12. <sup>13</sup>C{<sup>1</sup>H} NMR spectra of compound **3d-Tic** in CDCl<sub>3</sub> at 298K



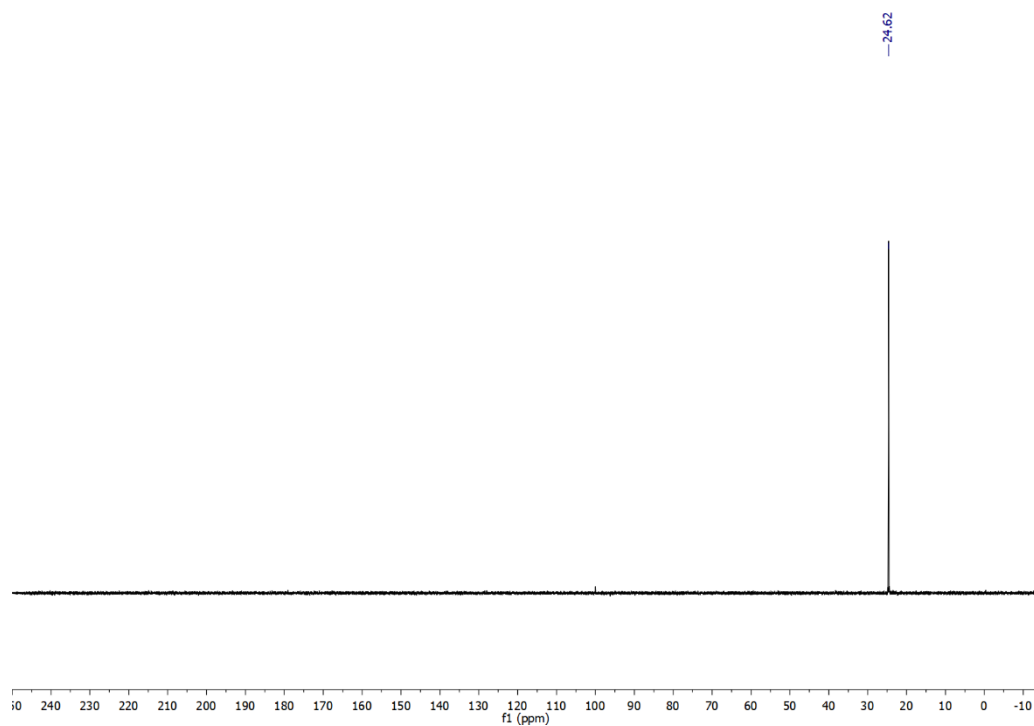

S 13. <sup>31</sup>P{<sup>1</sup>H} NMR spectra of compound **3d-Tic** in CDCl<sub>3</sub> at 298K

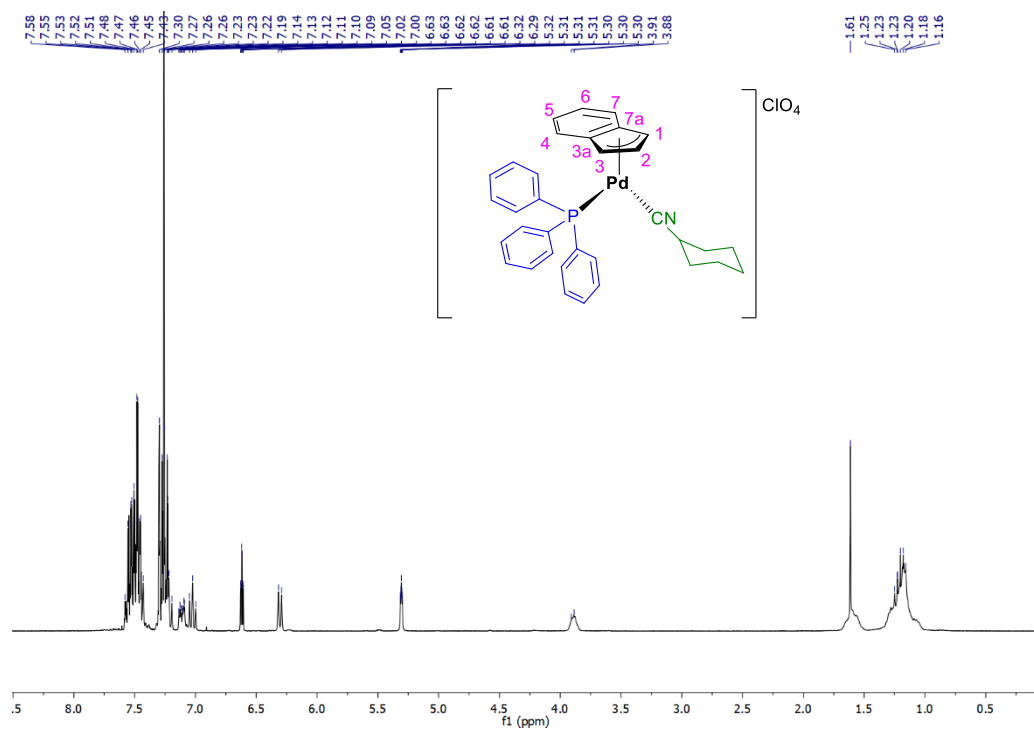

S 14. <sup>1</sup>H NMR spectra of compound **3a-Cyc** in CDCl<sub>3</sub> at 298K

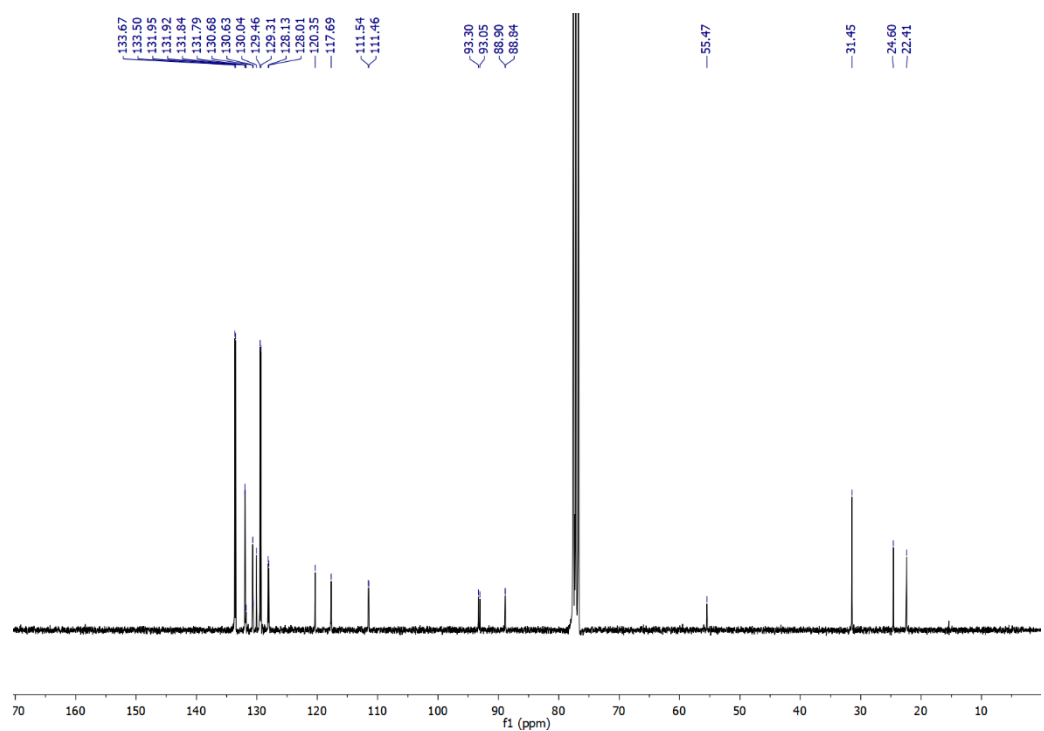

S 15.  $^{13}\text{C}\{^1\text{H}\}$  NMR spectra of compound **3a-Cyic** in  $\text{CDCl}_3$  at 298K

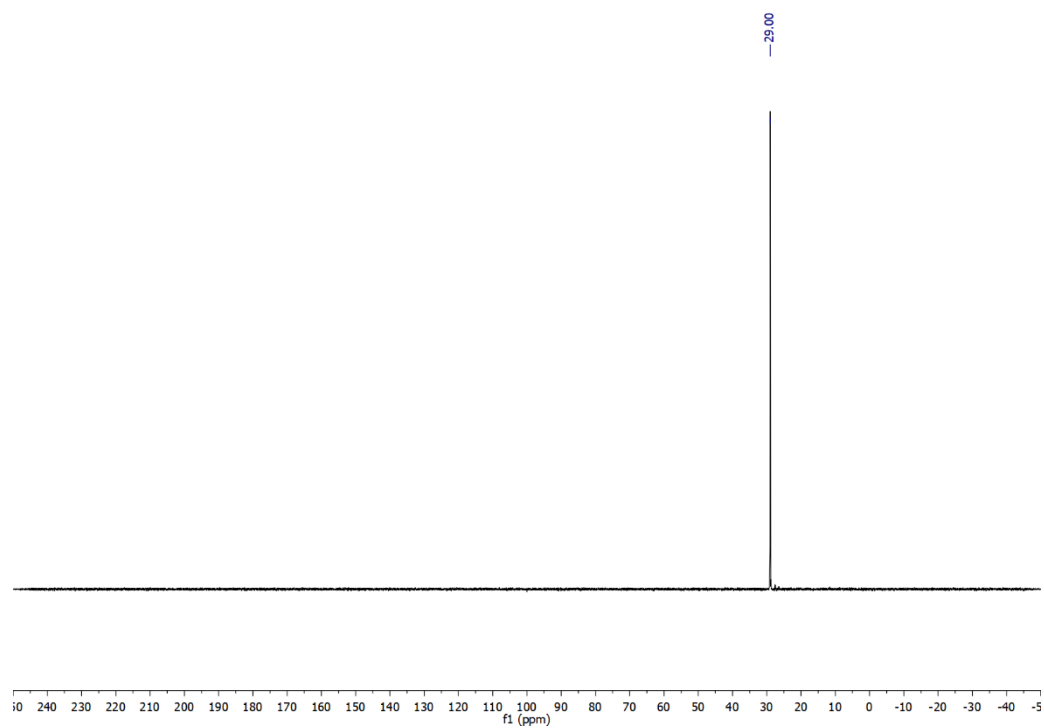

S 16.  $^{31}\text{P}\{^1\text{H}\}$  NMR spectra of compound **3a-Cyic** in  $\text{CDCl}_3$  at 298K

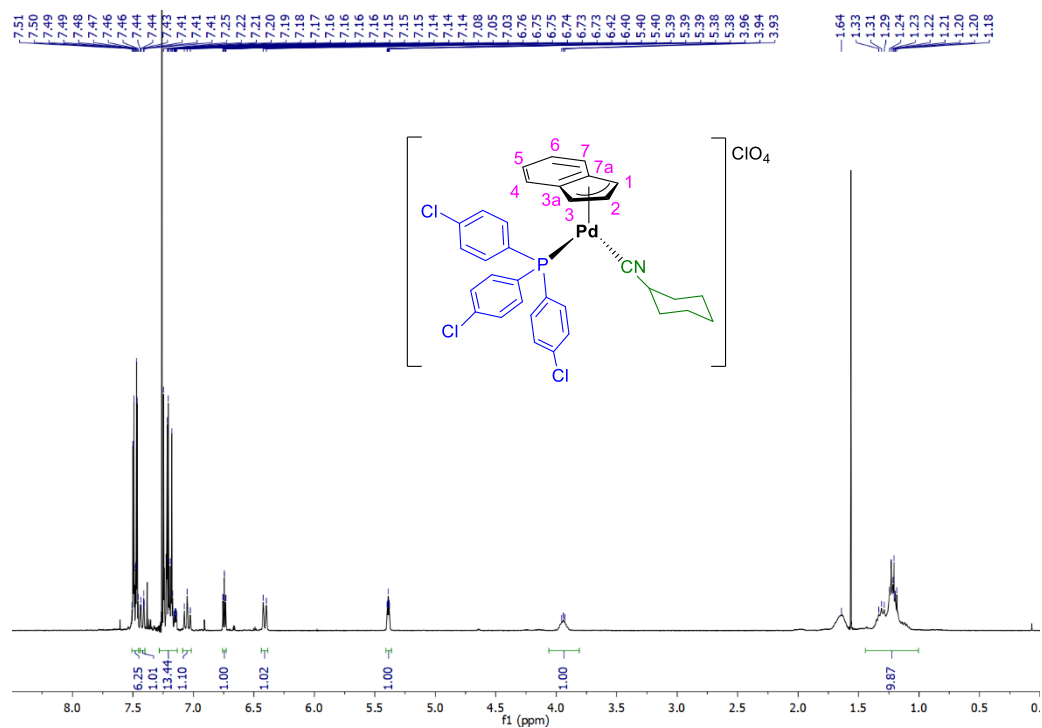

S 17. <sup>1</sup>H NMR spectra of compound **3b-Cyic** in CDCl<sub>3</sub> at 298K

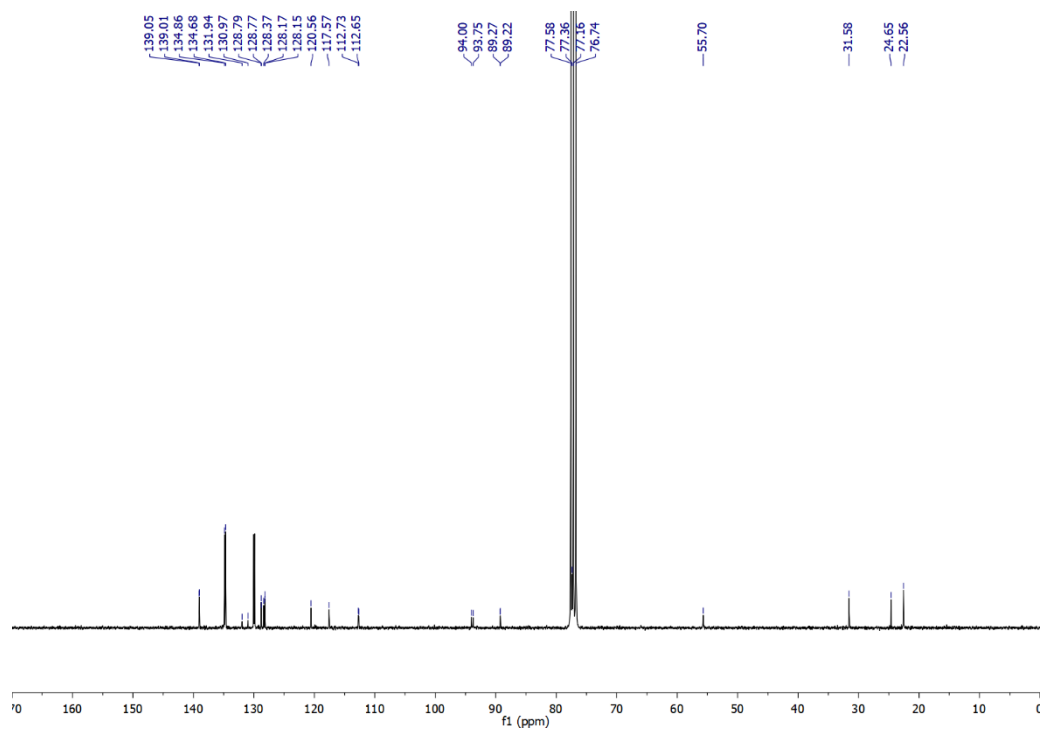

S 18. <sup>13</sup>C NMR spectra of compound **3b-Cyic** in CDCl<sub>3</sub> at 298K

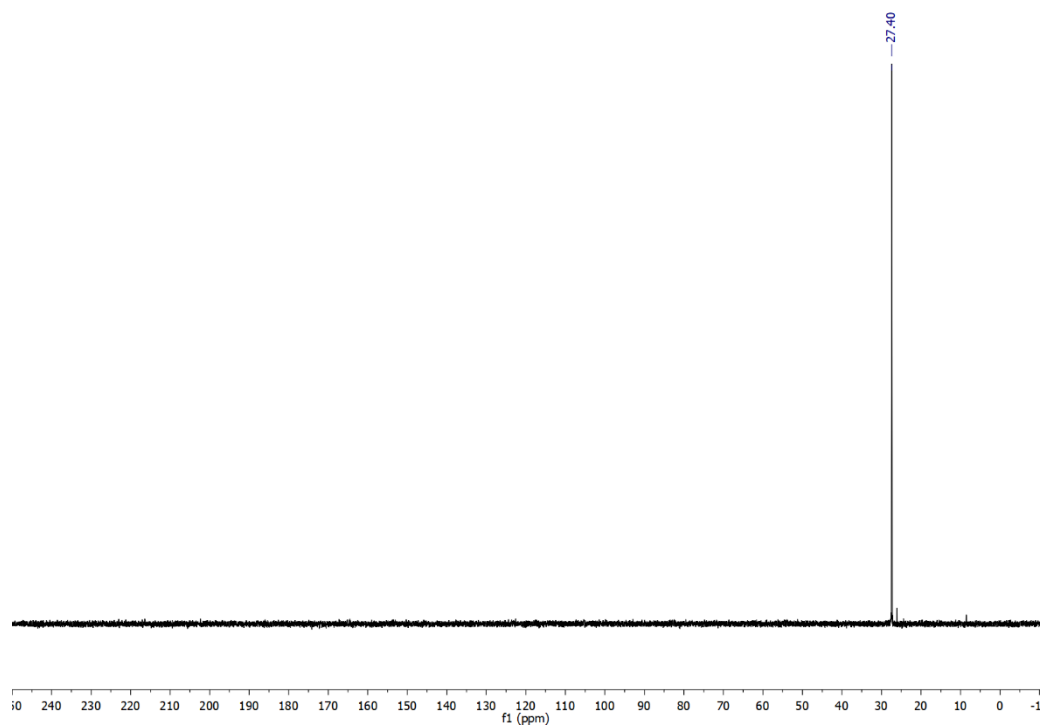

S 19.  $^{31}\text{P}\{^1\text{H}\}$  NMR spectra of compound **3b-Cyc** in  $\text{CDCl}_3$  at 298K

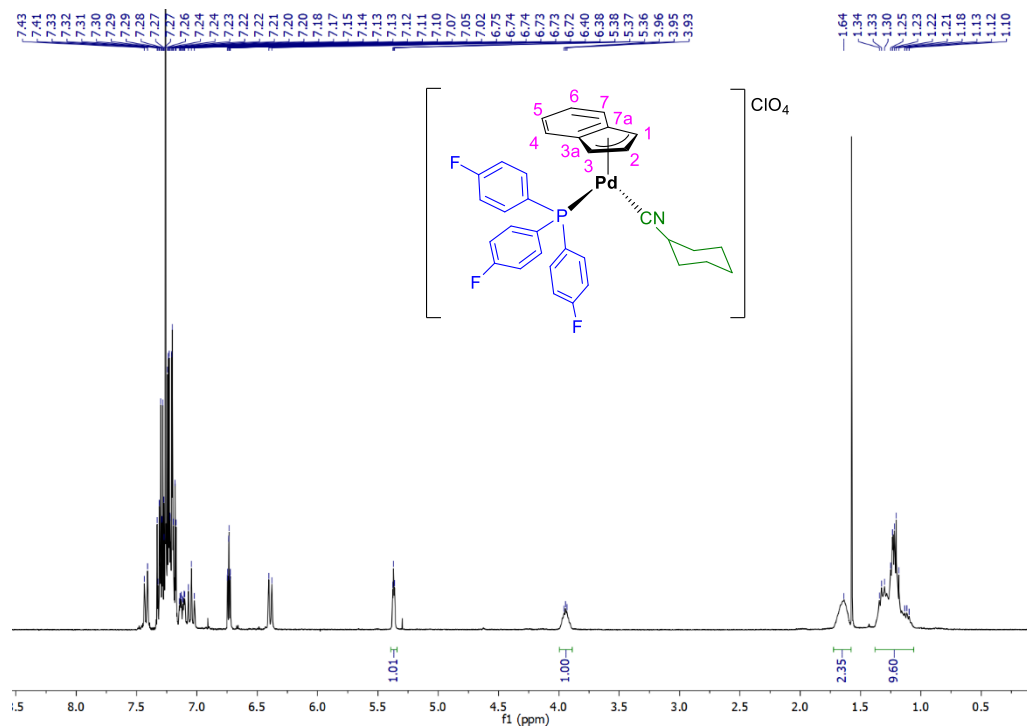

S 20.  $^1\text{H}$  NMR spectra of compound **3c-Cyc** in  $\text{CDCl}_3$  at 298K

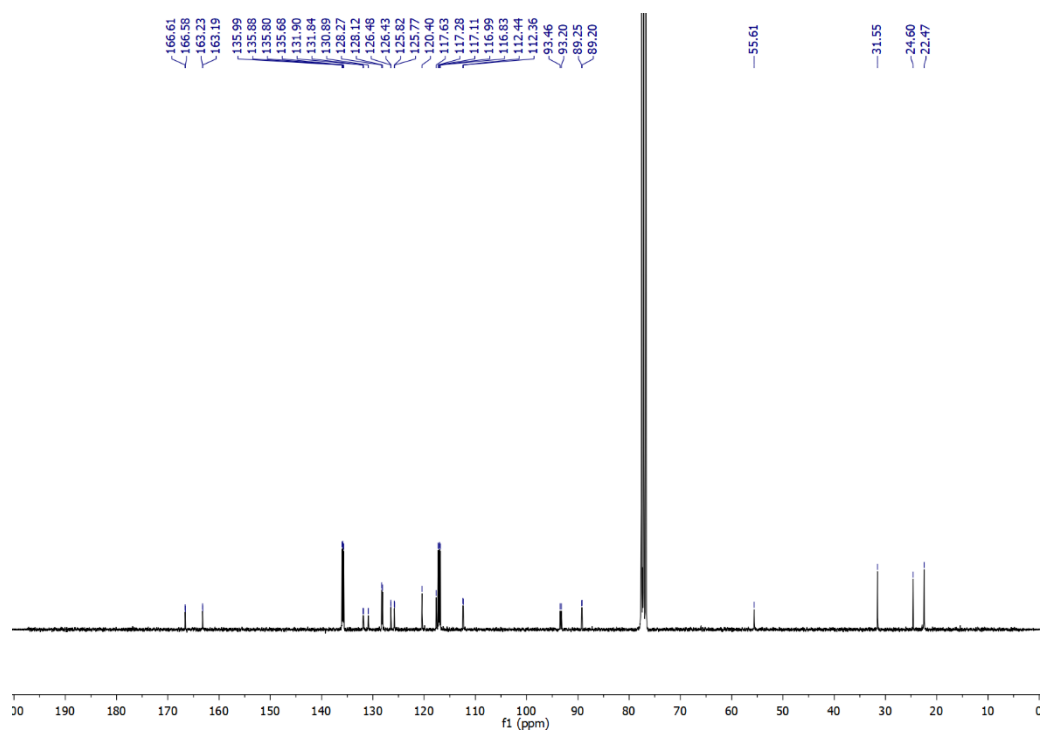

S 21.  $^{13}\text{C}\{^1\text{H}\}$  NMR spectra of compound **3c-Cyc** in  $\text{CDCl}_3$  at 298K

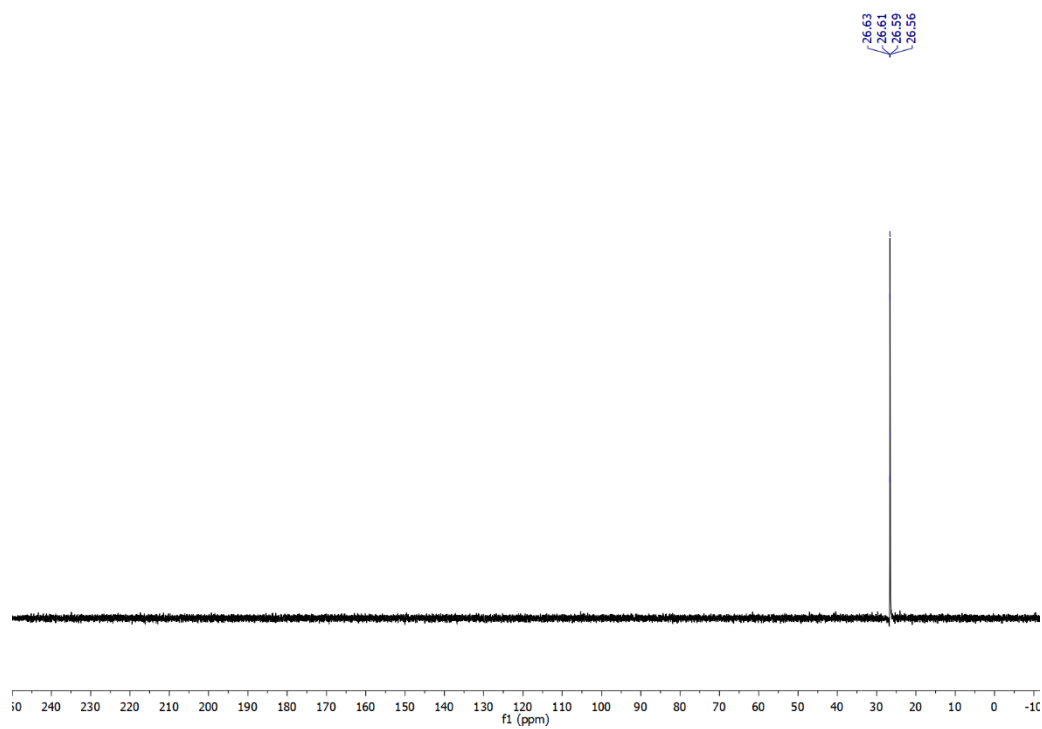

S 22.  $^{31}\text{P}\{^1\text{H}\}$  NMR spectra of compound **3c-Cyc** in  $\text{CDCl}_3$  at 298K

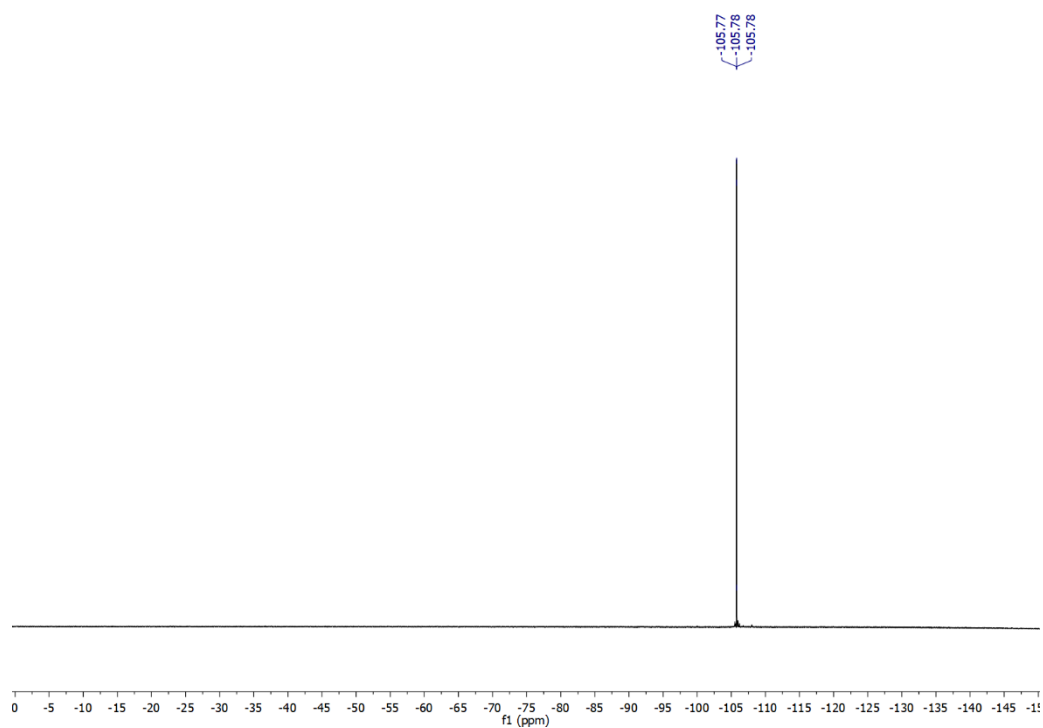

S 23.  $^{19}\text{F}\{^1\text{H}\}$  NMR spectra of compound **3c-Cyc** in  $\text{CDCl}_3$  at 298K

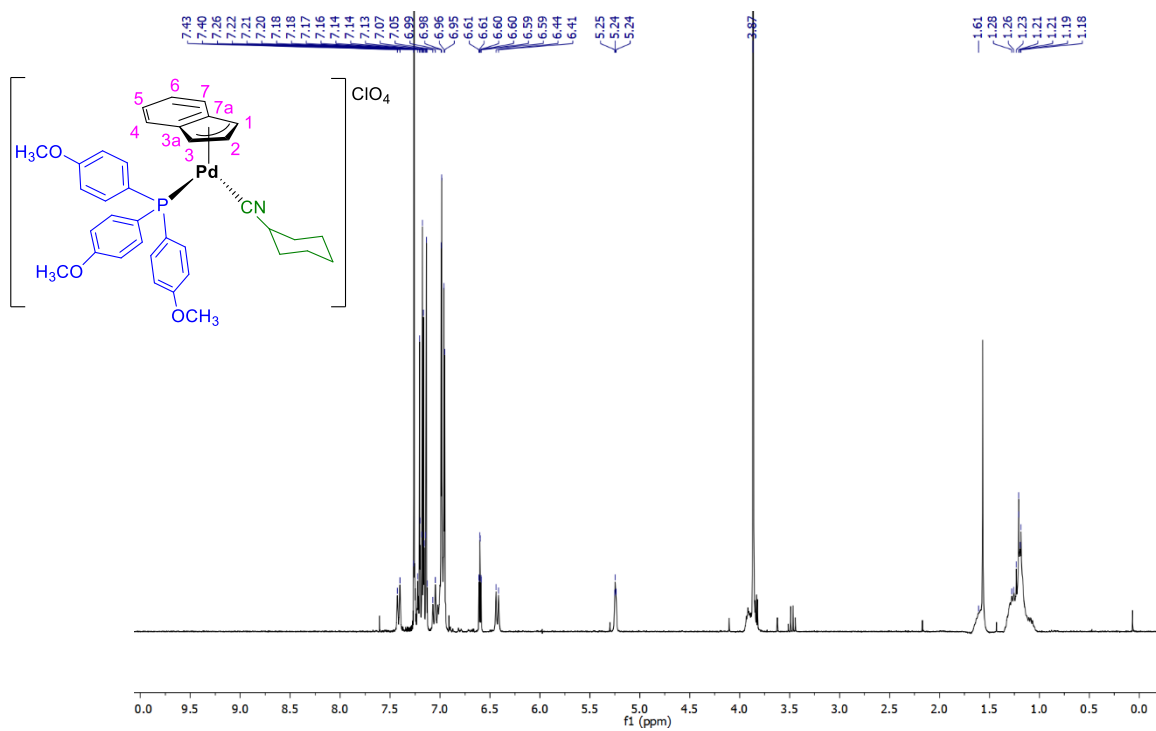

S 24.  $^1\text{H}$  NMR spectra of compound **3d-Cyc** in  $\text{CDCl}_3$  at 298K

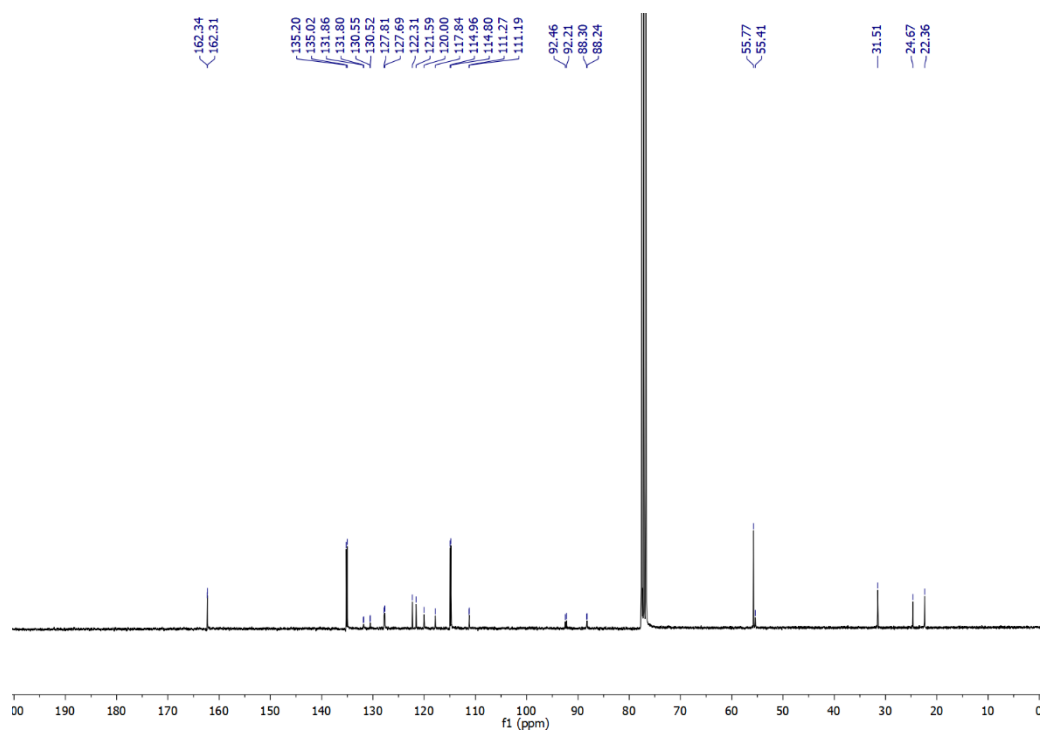

S 25.  $^{13}\text{C}\{^1\text{H}\}$  NMR spectra of compound **3d-Cyic** in  $\text{CDCl}_3$  at 298K

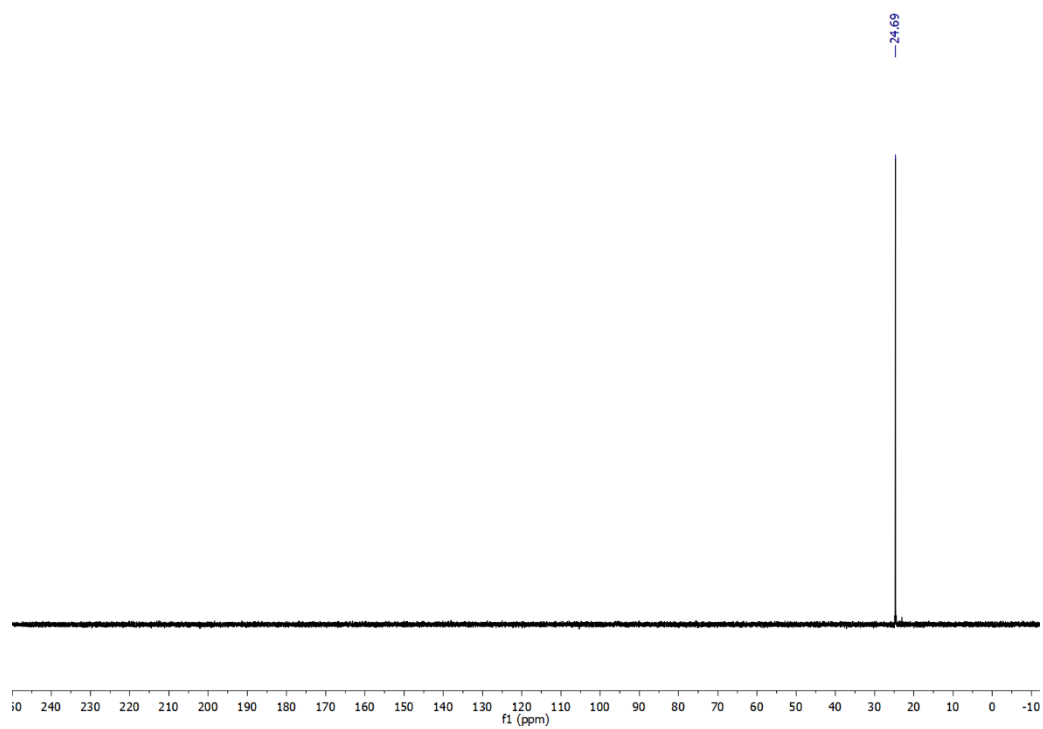

S 26.  $^{31}\text{P}\{^1\text{H}\}$  NMR spectra of compound **3d-Cyic** in  $\text{CDCl}_3$  at 298K

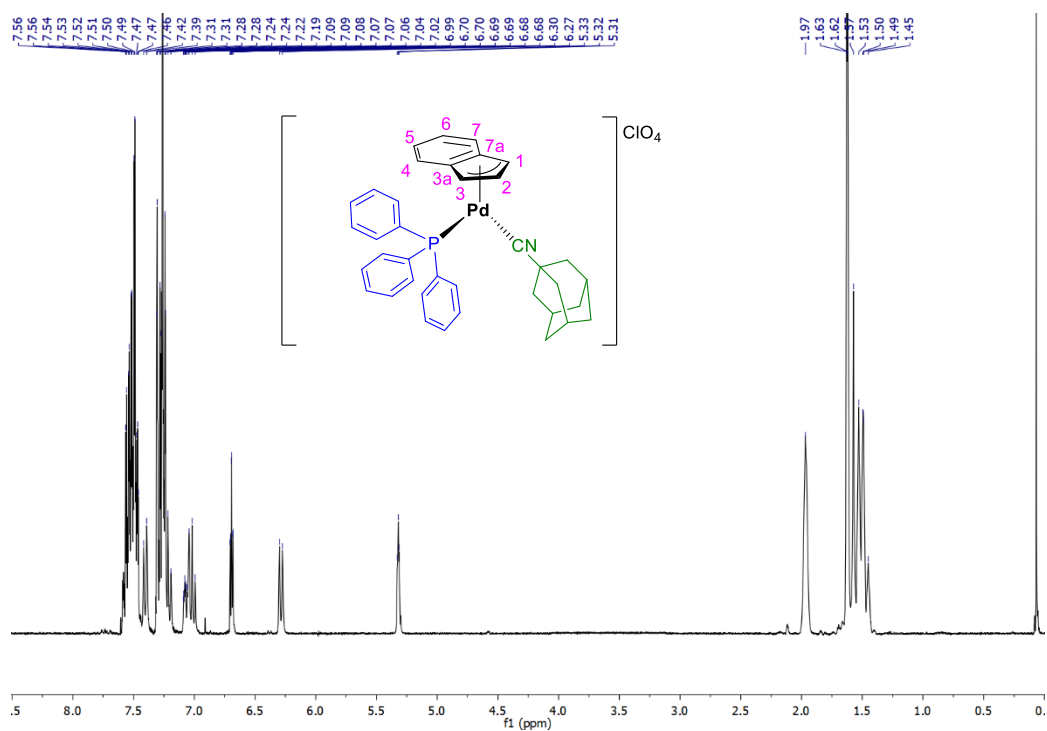

S 27. <sup>1</sup>H NMR spectra of compound **3a-Adic** in CDCl<sub>3</sub> at 298K

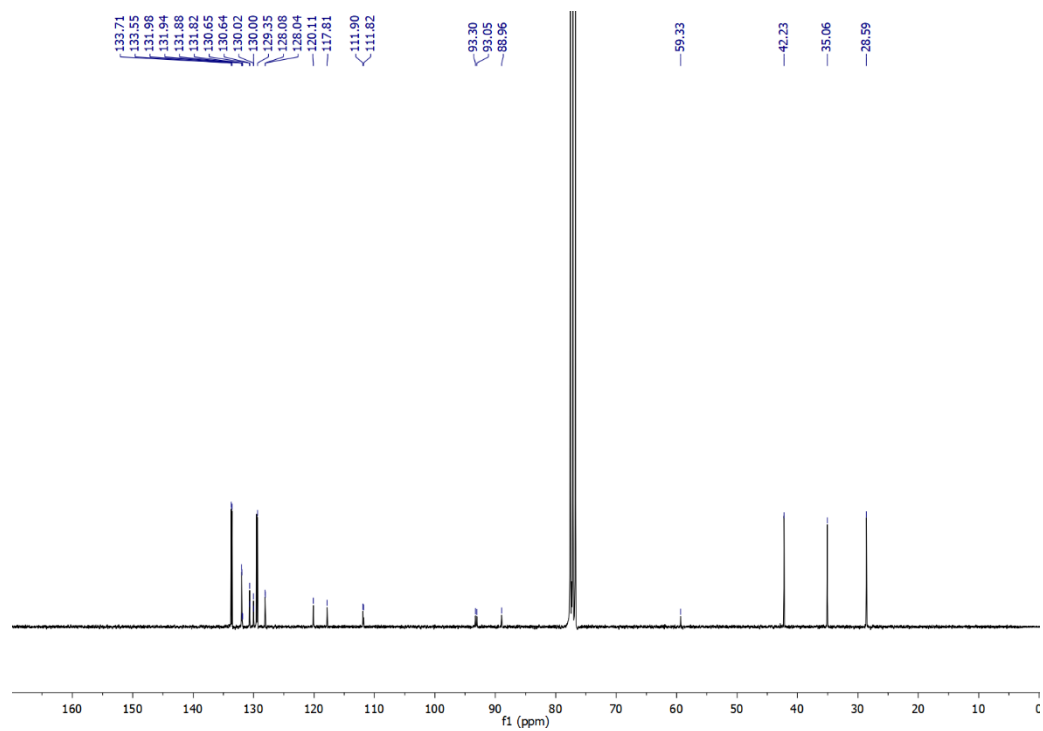

S 28. <sup>13</sup>C{<sup>1</sup>H} NMR spectra of compound **3a-Adic** in CDCl<sub>3</sub> at 298K



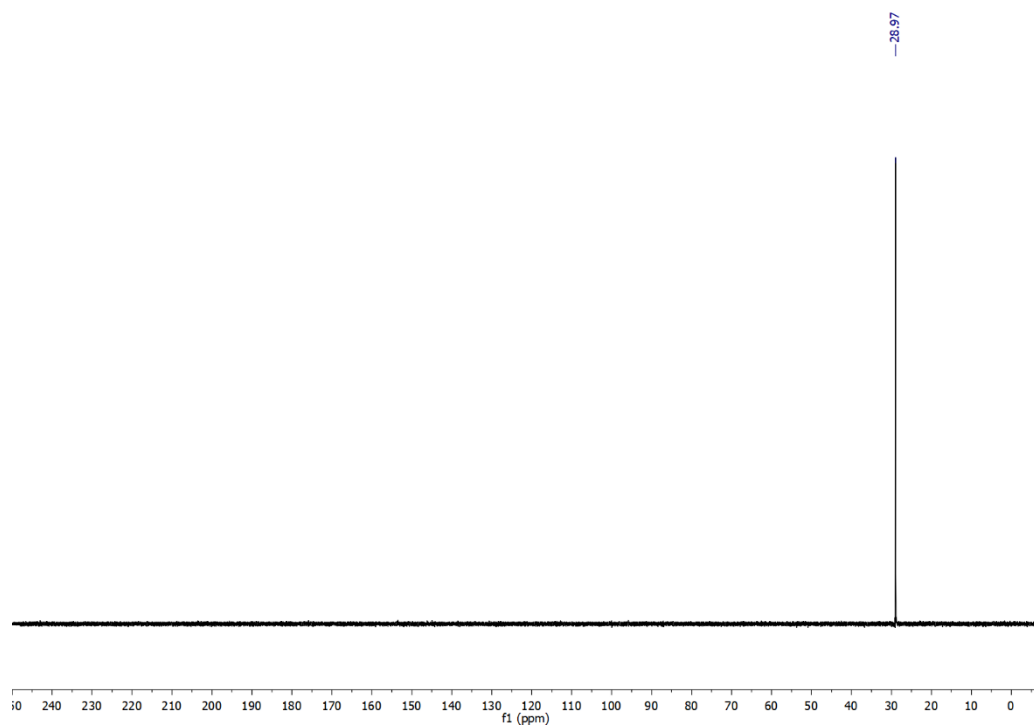

S 29. <sup>31</sup>P{<sup>1</sup>H} NMR spectra of compound **3a-Adic** in CDCl<sub>3</sub> at 298K

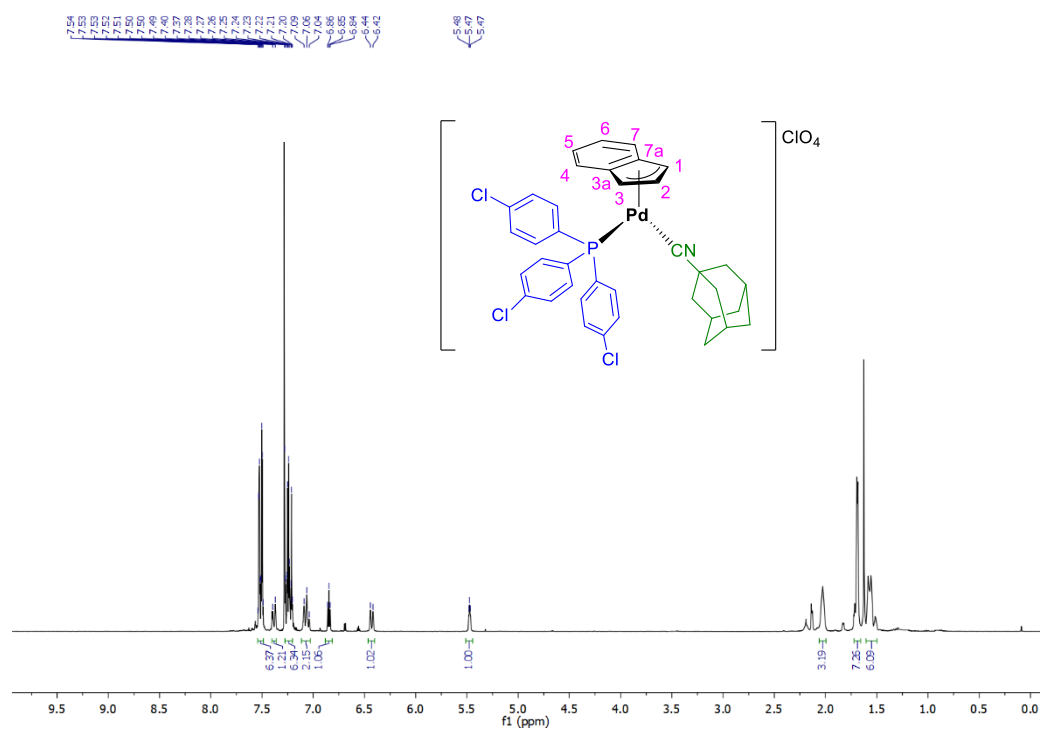

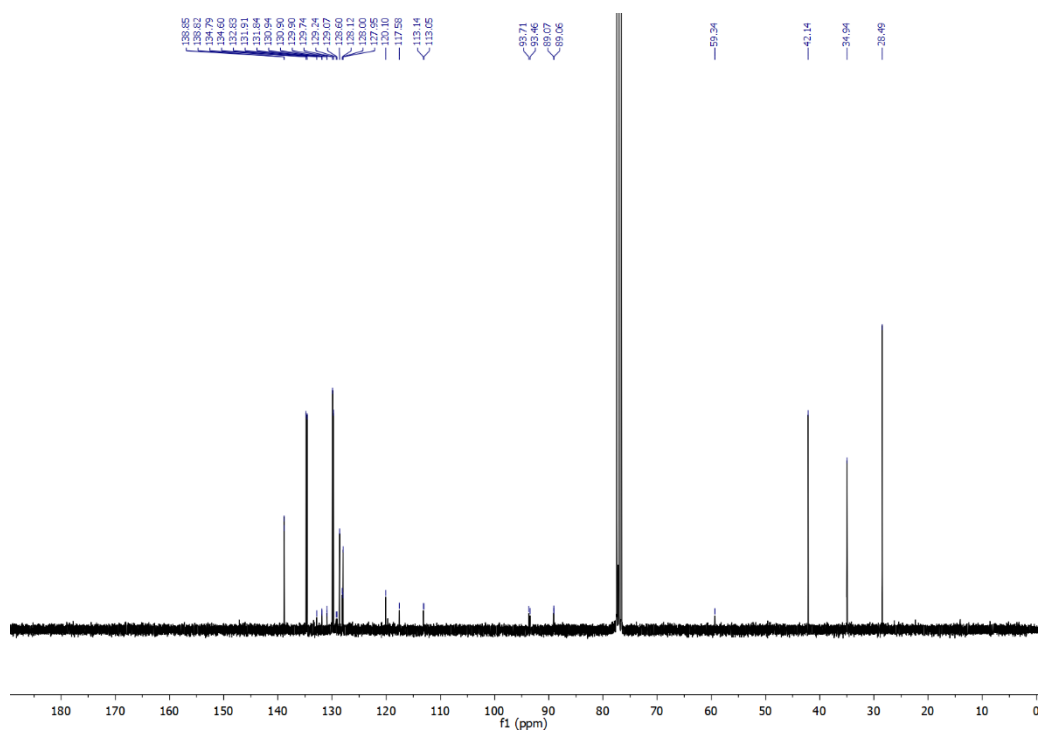

S 31.  $^{13}\text{C}\{^1\text{H}\}$  NMR spectra of compound **3b-Adic** in  $\text{CDCl}_3$  at 298K

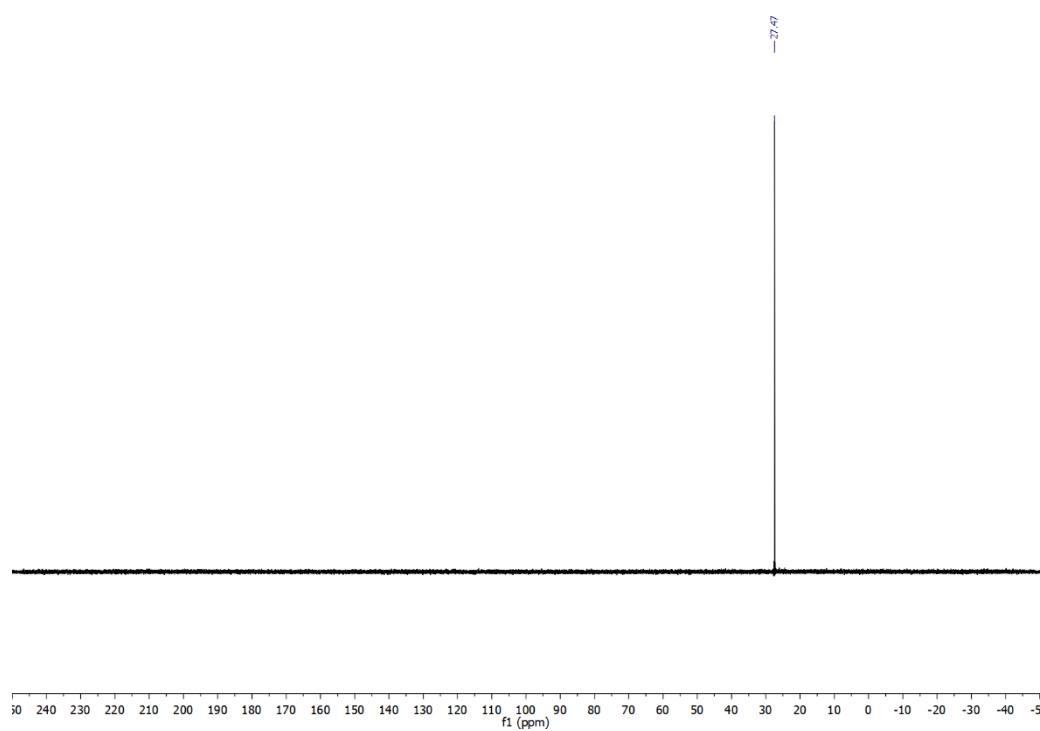

S 32.  $^{31}\text{P}\{^1\text{H}\}$  NMR spectra of compound **3b-Adic** in  $\text{CDCl}_3$  at 298K

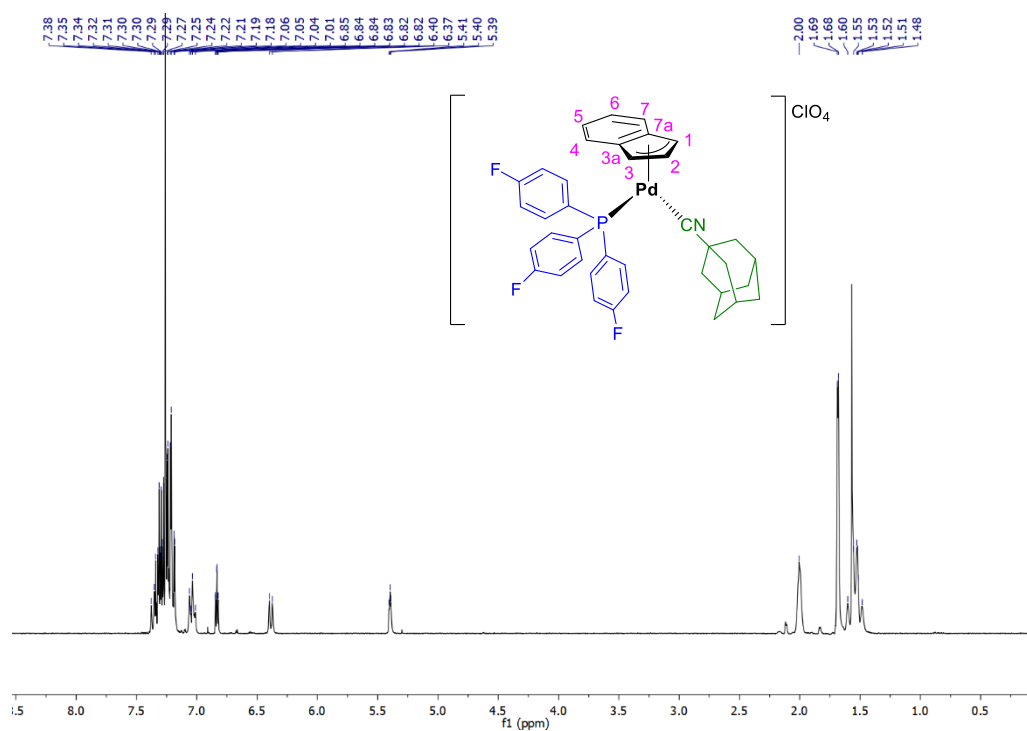

S 33. <sup>1</sup>H NMR spectra of compound **3c-Adic** in CDCl<sub>3</sub> at 298K

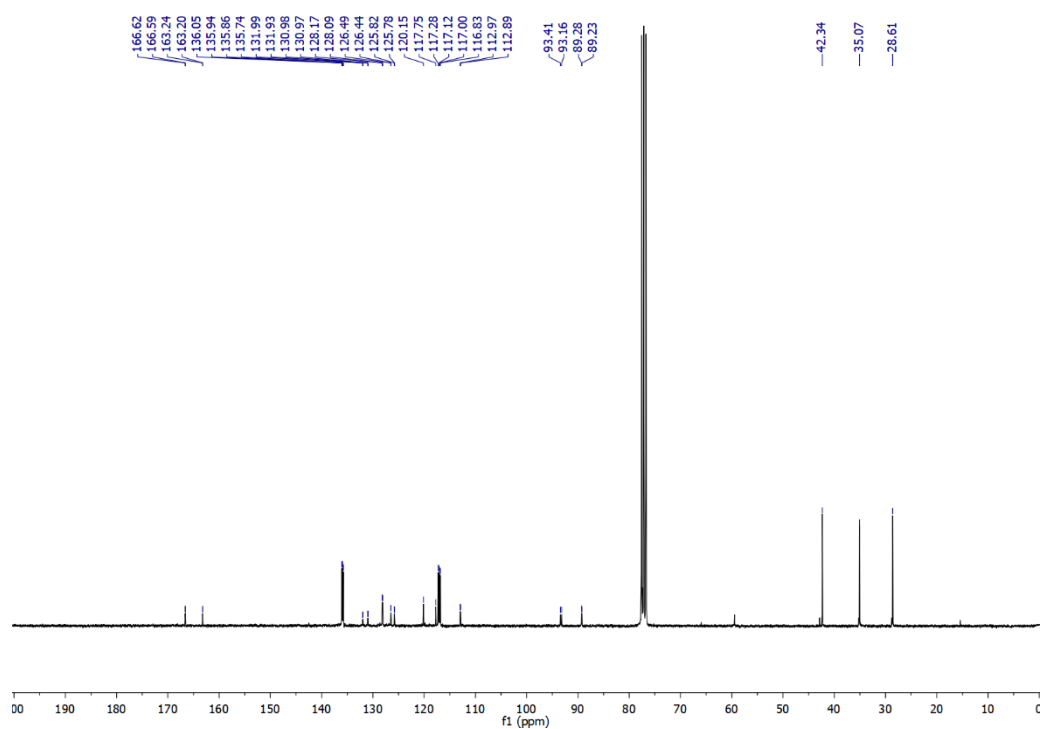

S 34. <sup>13</sup>C{<sup>1</sup>H} NMR spectra of compound **3c-Adic** in CDCl<sub>3</sub> at 298K

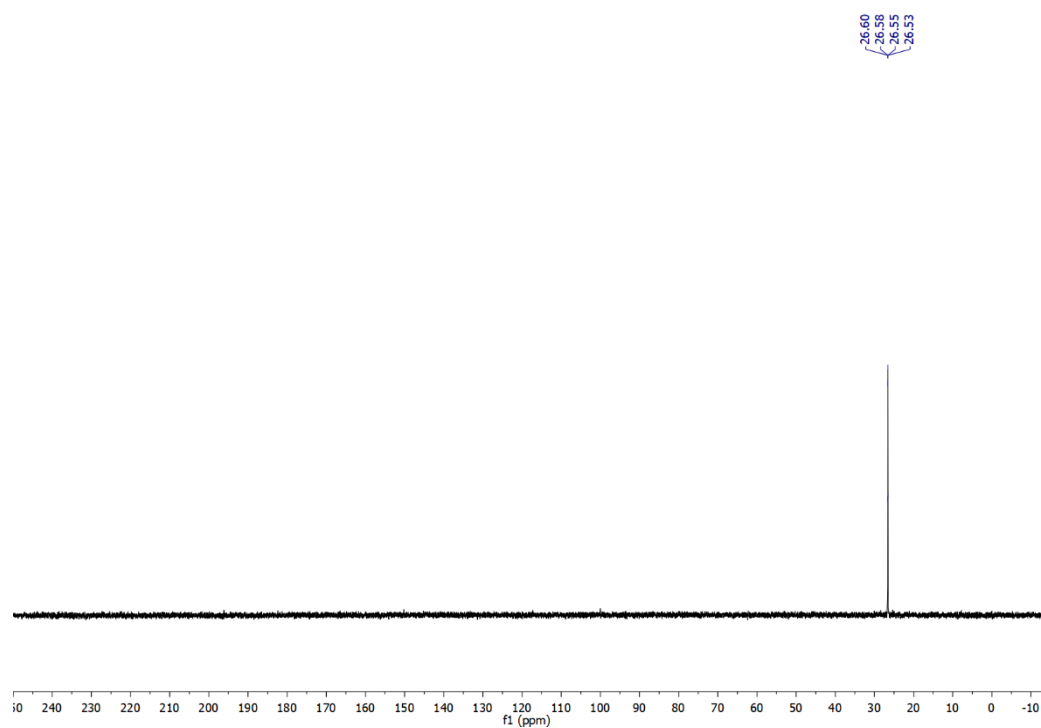

S 35.  $^{31}\text{P}\{^1\text{H}\}$  NMR spectra of compound **3c-Adic** in  $\text{CDCl}_3$  at 298K

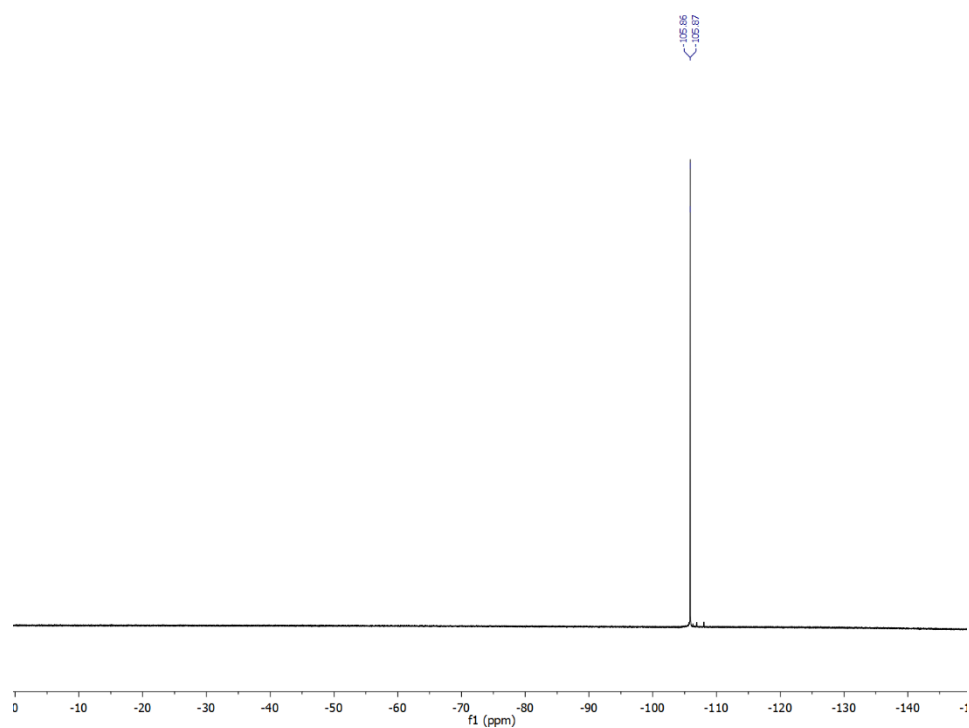

S 36.  $^{19}\text{F}\{^1\text{H}\}$  NMR spectra of compound **3c-Adic** in  $\text{CDCl}_3$  at 298K

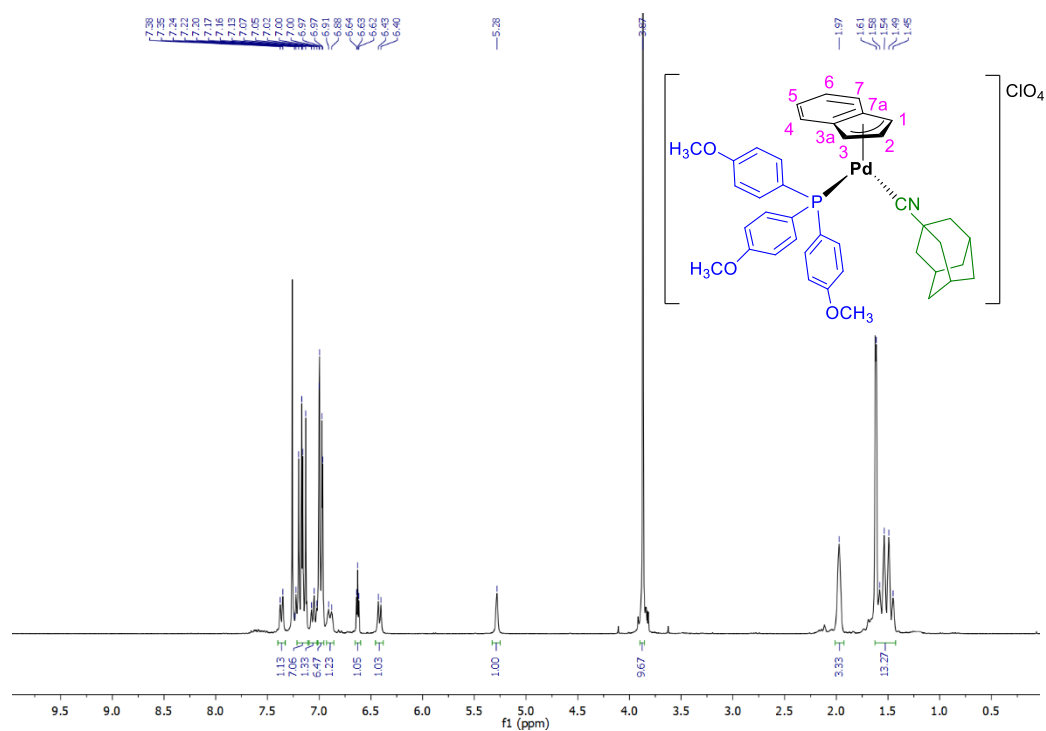

S 37. <sup>1</sup>H NMR spectra of compound **3d-Adic** in CDCl<sub>3</sub> at 298K

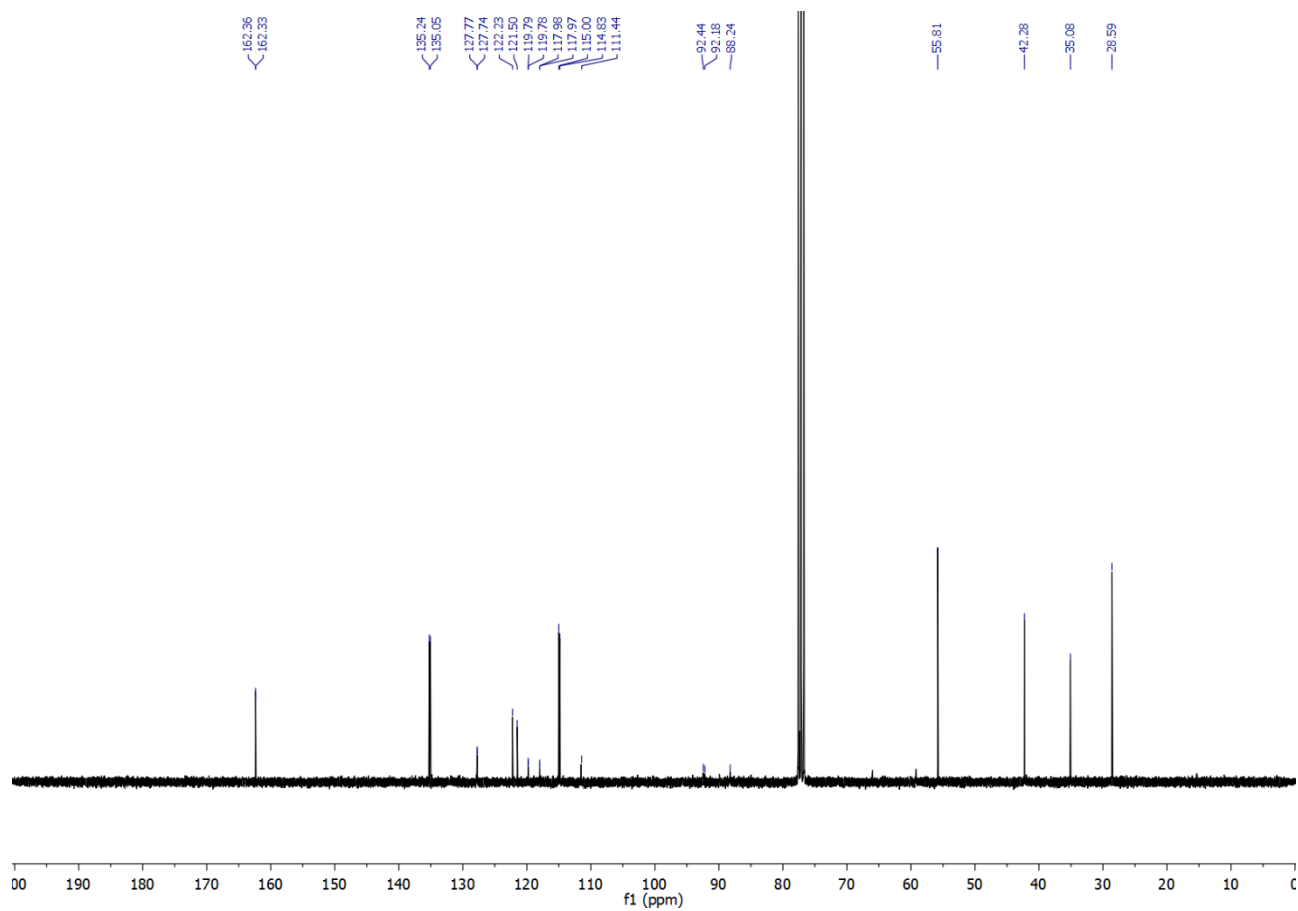

S 38. <sup>13</sup>C{<sup>1</sup>H} NMR spectra of compound **3d-Adic** in CDCl<sub>3</sub> at 298K

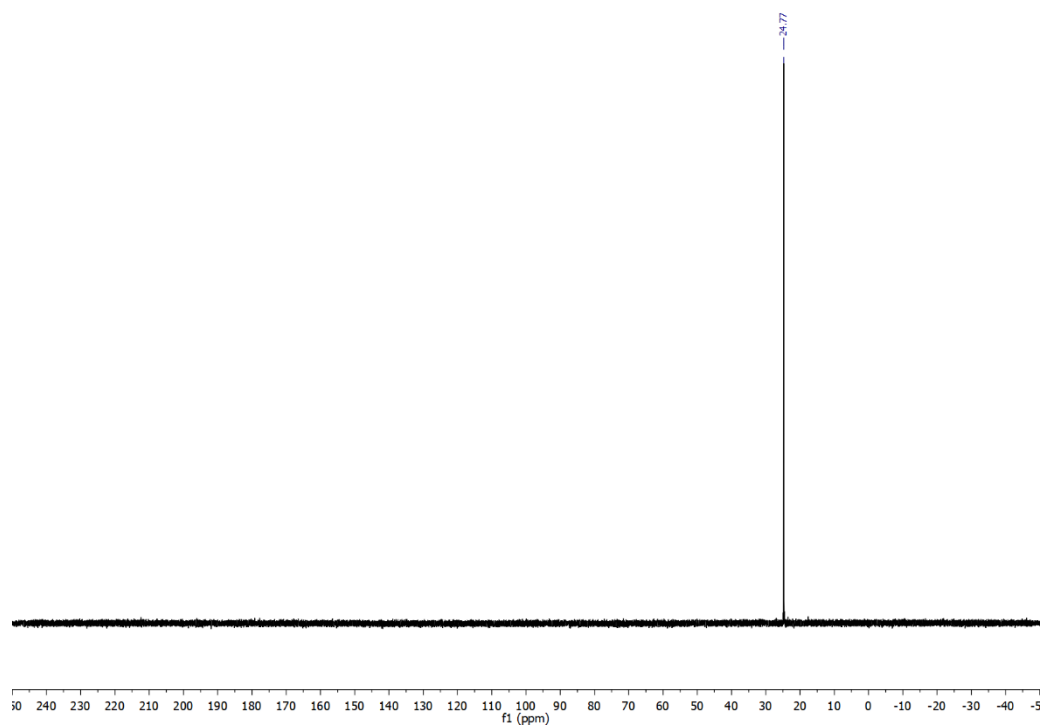

S 39.  $^{31}\text{P}\{^1\text{H}\}$  NMR spectra of compound **3d-Adic** in  $\text{CDCl}_3$  at 298K

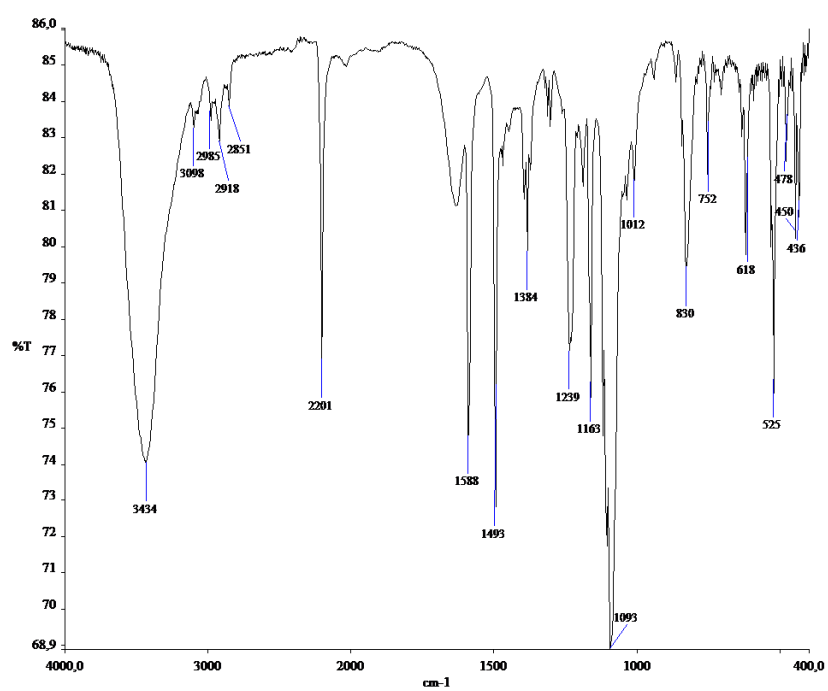

S 40. IR spectra of compound **3c-Tic**

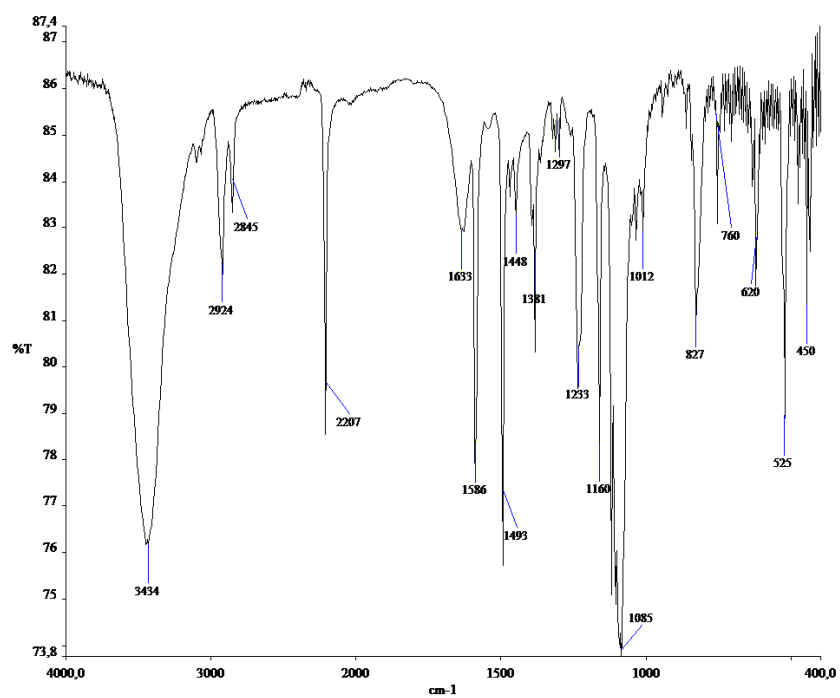

S 41. IR spectra of compound 3c-Cyic

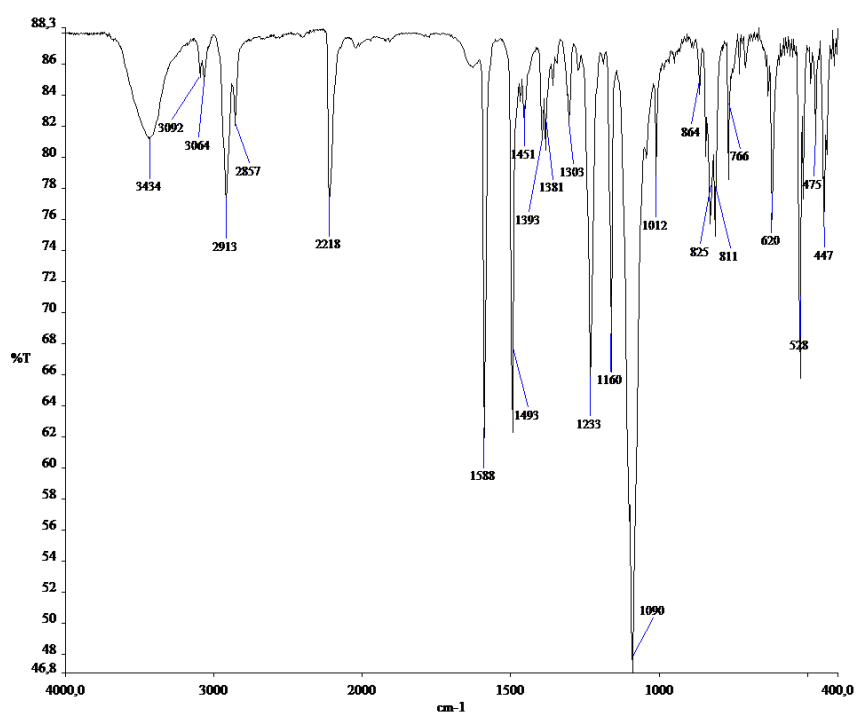

S 42. IR spectra of compound 3c-Adic

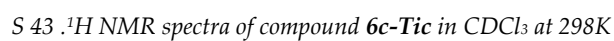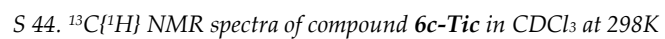



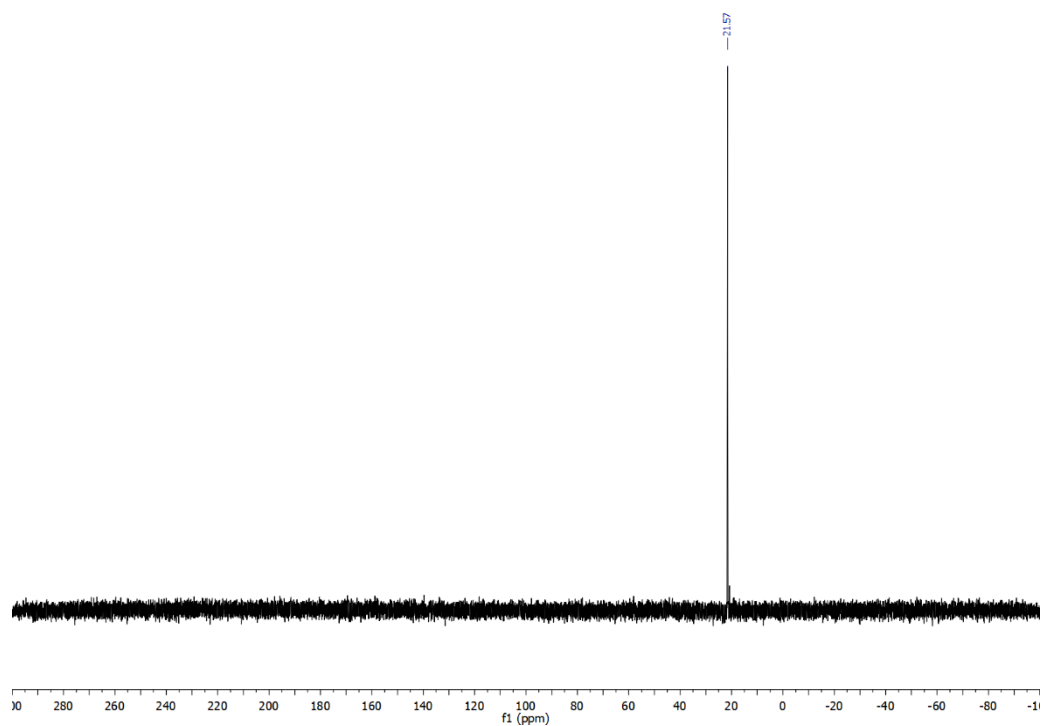

S 45.  $^{31}\text{P}\{^1\text{H}\}$  NMR spectra of compound **6c-Tic** in  $\text{CDCl}_3$  at 298K

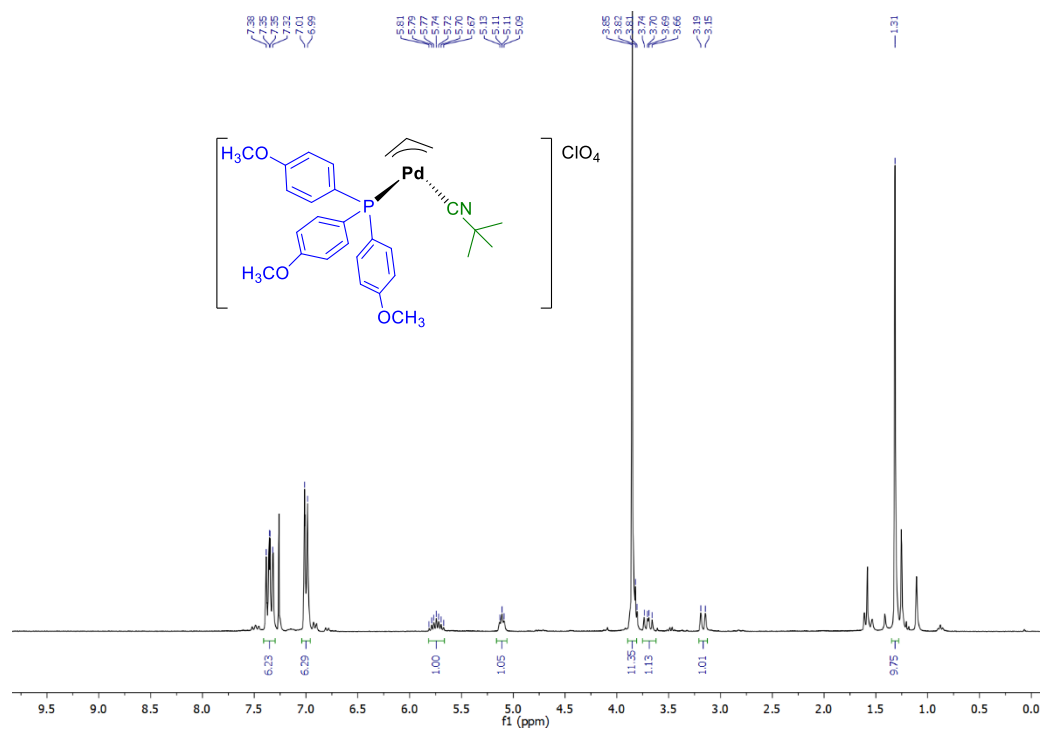

S 46.  $^1\text{H}$  NMR spectra of compound **6d-Tic** in  $\text{CDCl}_3$  at 298K

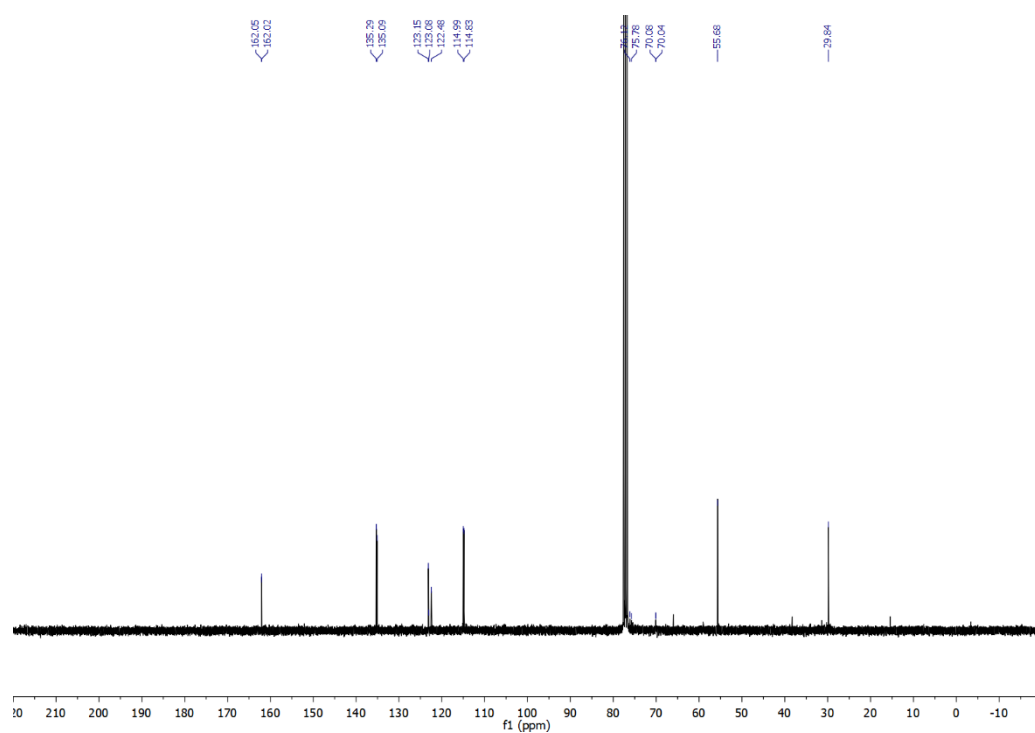

S 47.  $^{13}\text{C}\{^1\text{H}\}$  NMR spectra of compound **6d-Tic** in  $\text{CDCl}_3$  at 298K

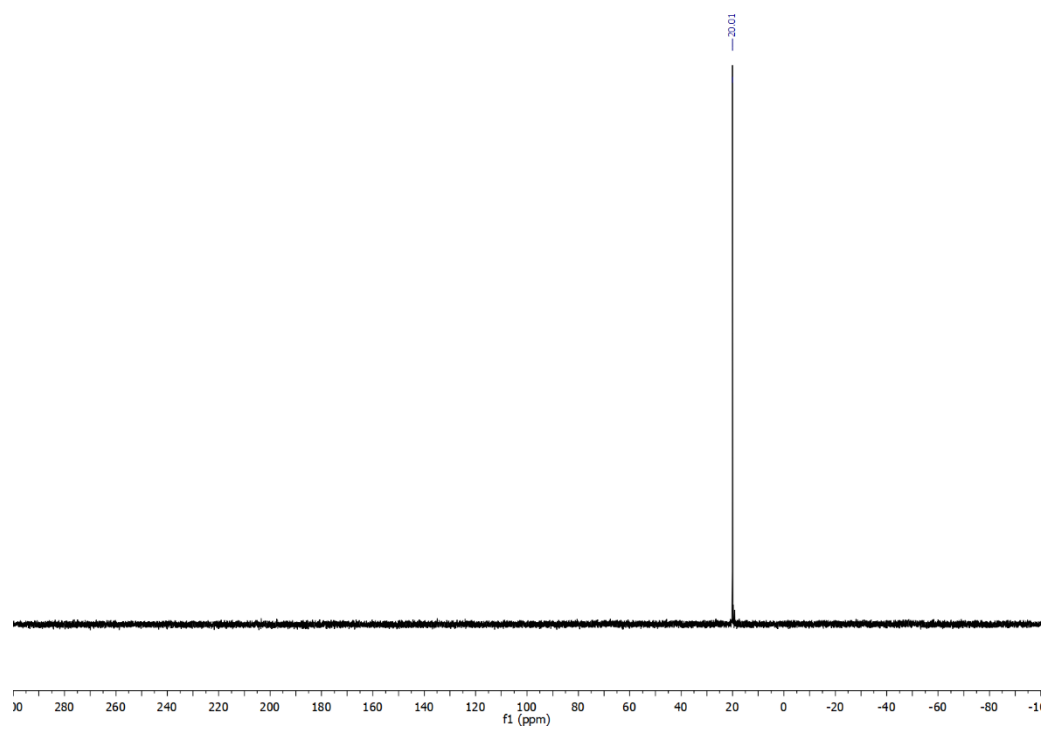

S 48.  $^{31}\text{P}\{^1\text{H}\}$  NMR spectra of compound **6d-Tic** in  $\text{CDCl}_3$  at 298K

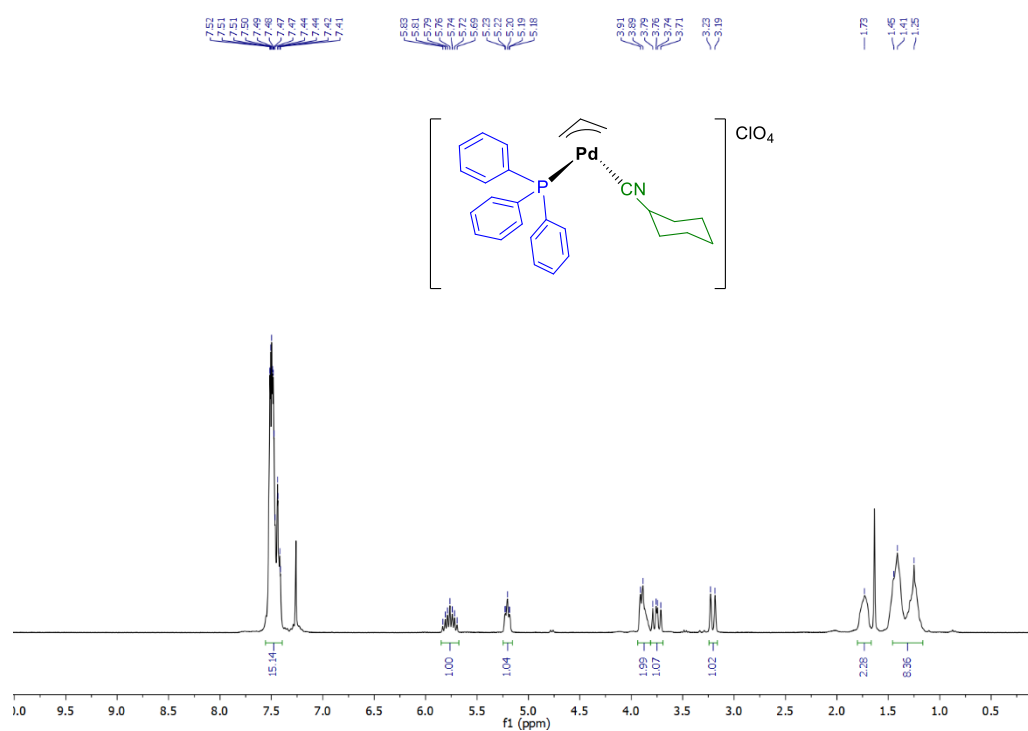

S 49.  $^1\text{H}$  NMR spectra of compound **6a-Cyic** in  $\text{CDCl}_3$  at 298K

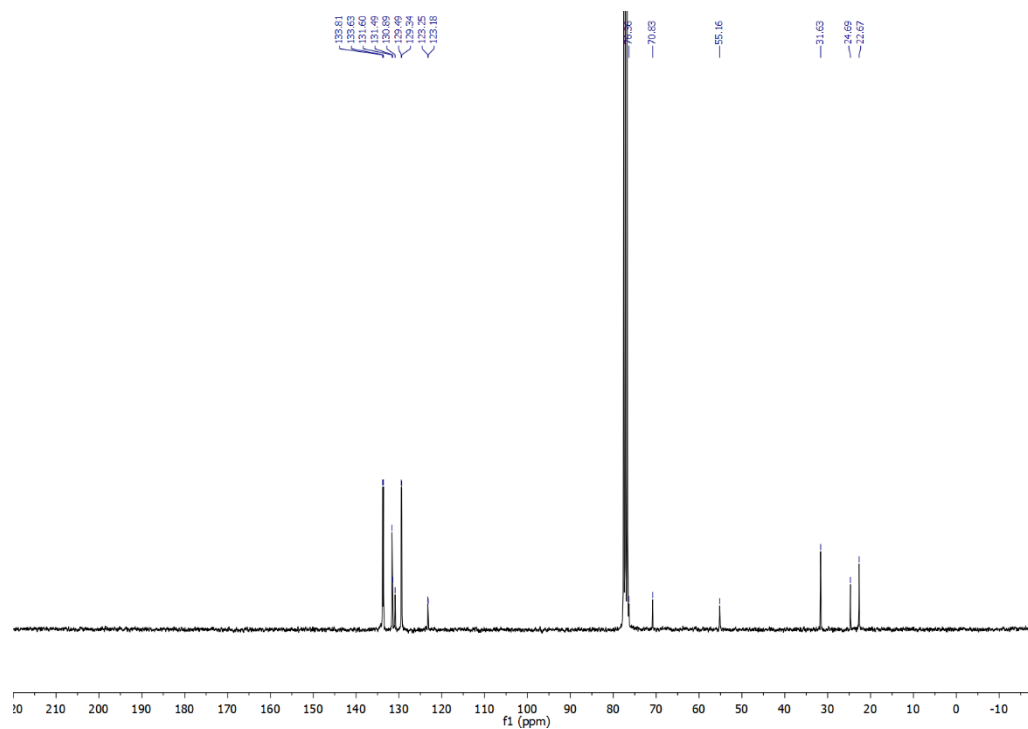

S 50.  $^{13}\text{C}$  NMR spectra of compound **6a-Cyic** in  $\text{CDCl}_3$  at 298K

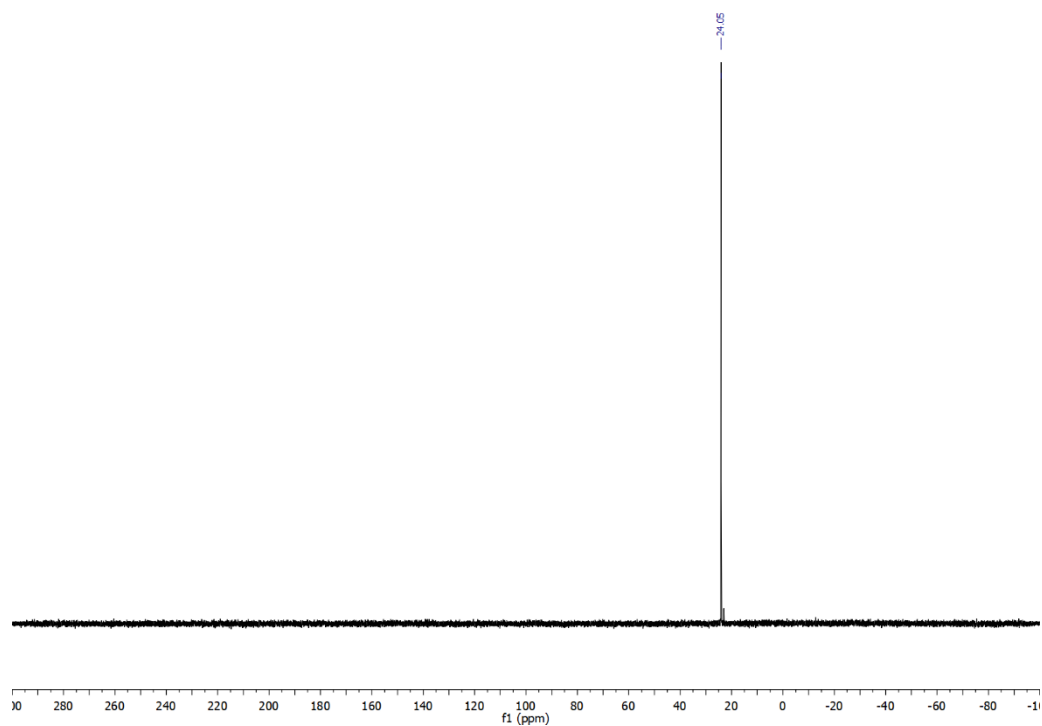

S 51.  $^{31}\text{P}\{^1\text{H}\}$  NMR spectra of compound **6a-Cyic** in  $\text{CDCl}_3$  at 298K

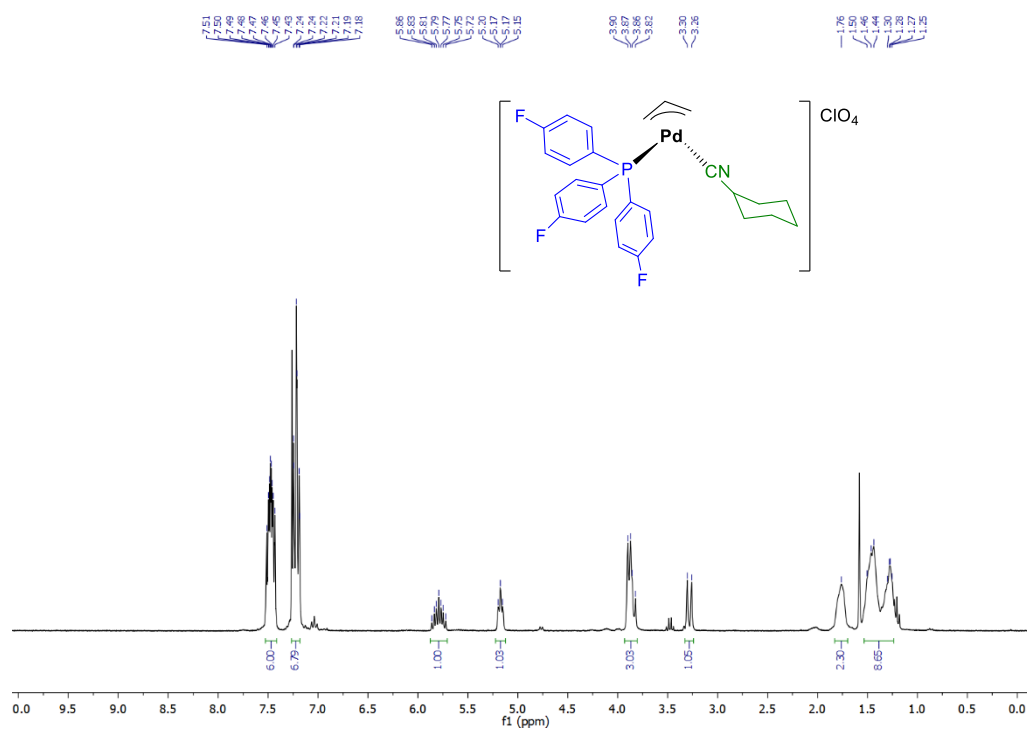

S 52.  $^1\text{H}$  NMR spectra of compound **6c-Cyic** in  $\text{CDCl}_3$  at 298K

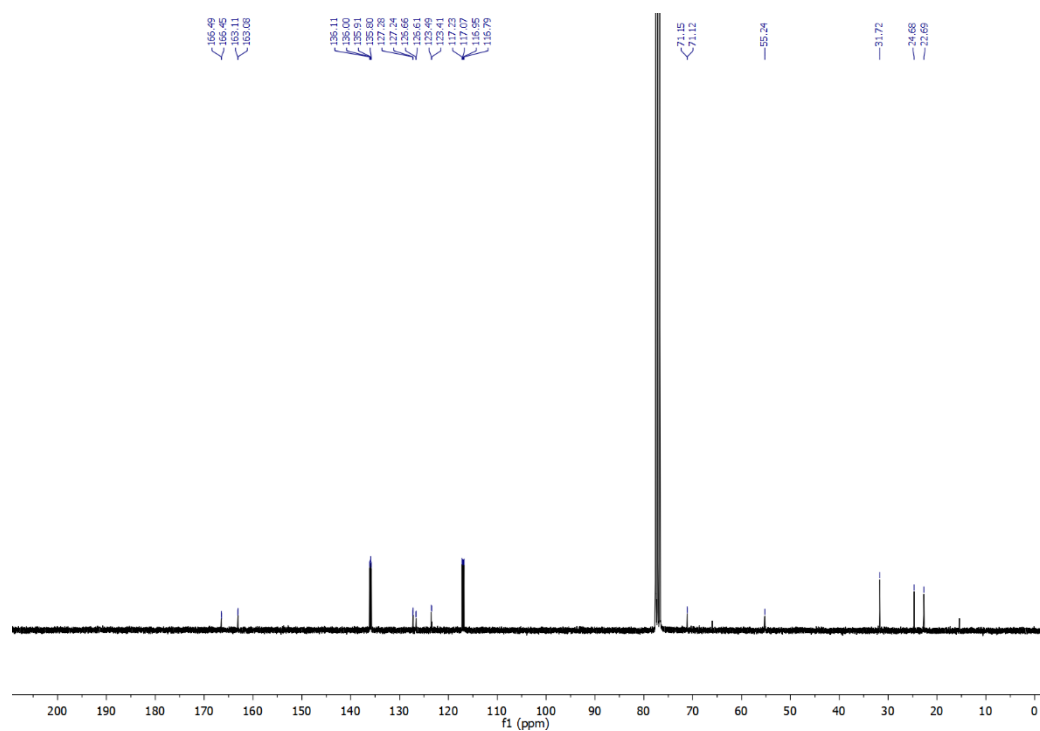

S 53.  $^{13}\text{C}\{^1\text{H}\}$  NMR spectra of compound **6c-Cyic** in  $\text{CDCl}_3$  at 298K

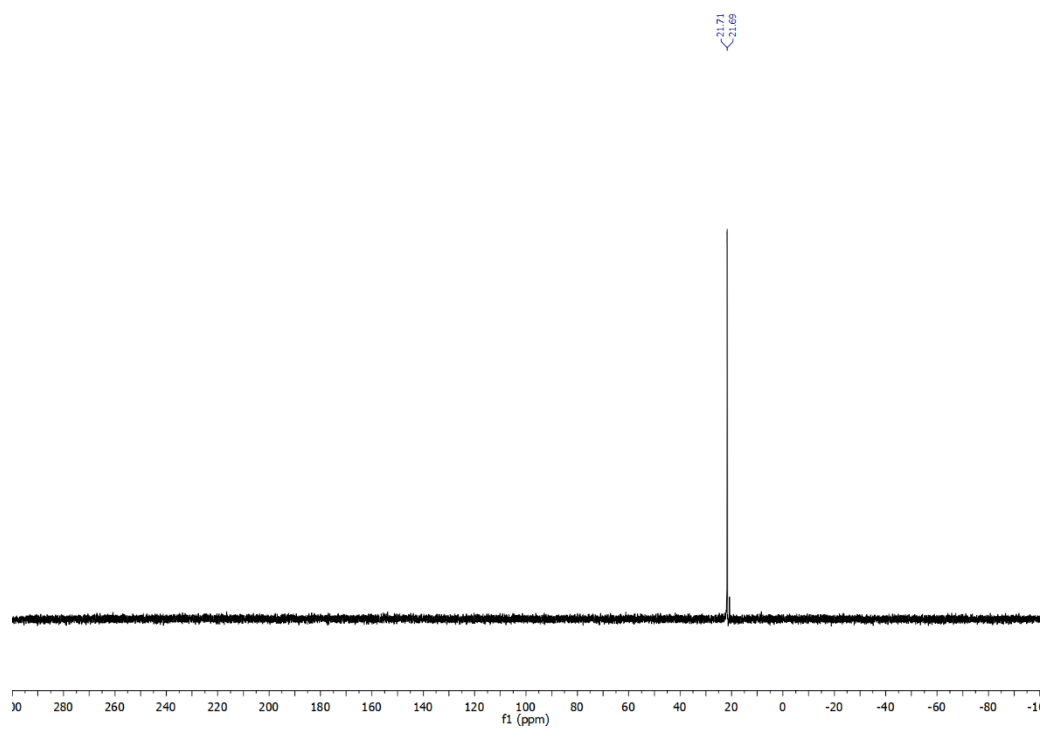

S 54.  $^{31}\text{P}\{^1\text{H}\}$  NMR spectra of compound **6c-Cyic** in  $\text{CDCl}_3$  at 298K

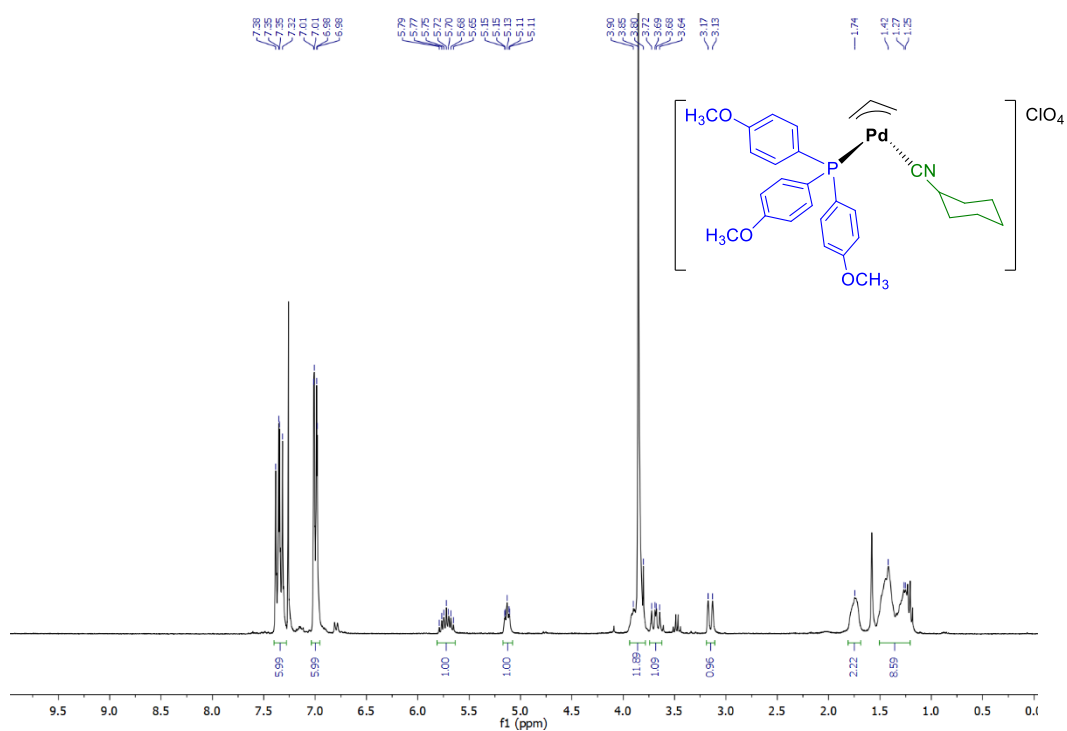

S 55. <sup>1</sup>H NMR spectra of compound **6d-Cyic** in CDCl<sub>3</sub> at 298K

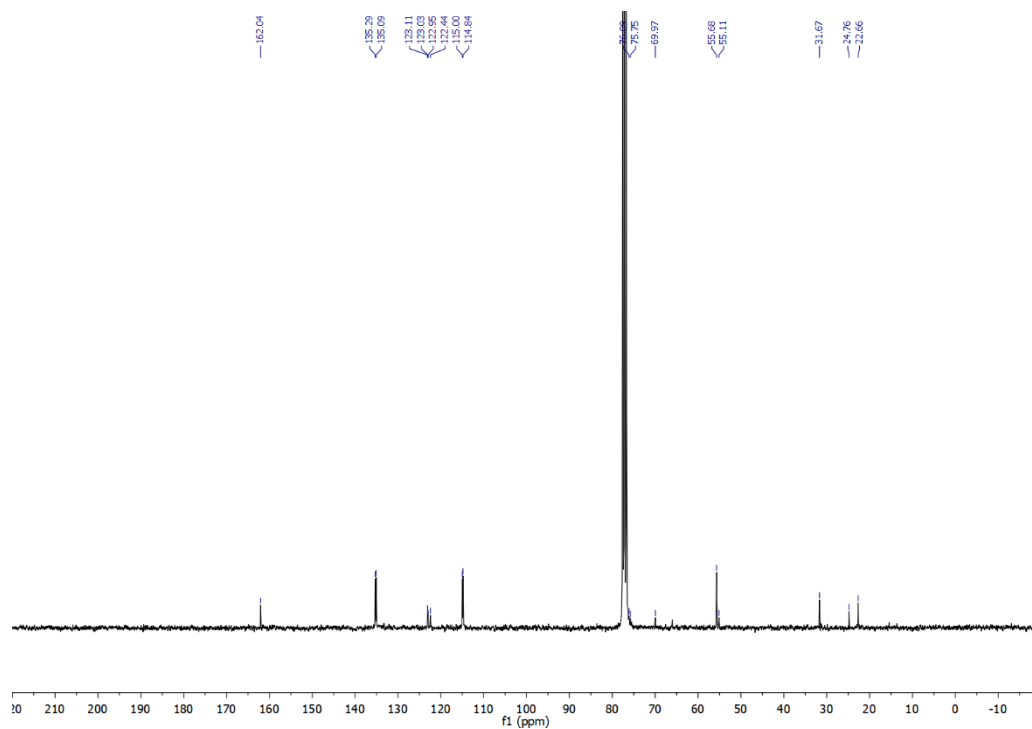

S 56. <sup>13</sup>C[<sup>1</sup>H] NMR spectra of compound **6d-Cyic** in CDCl<sub>3</sub> at 298K

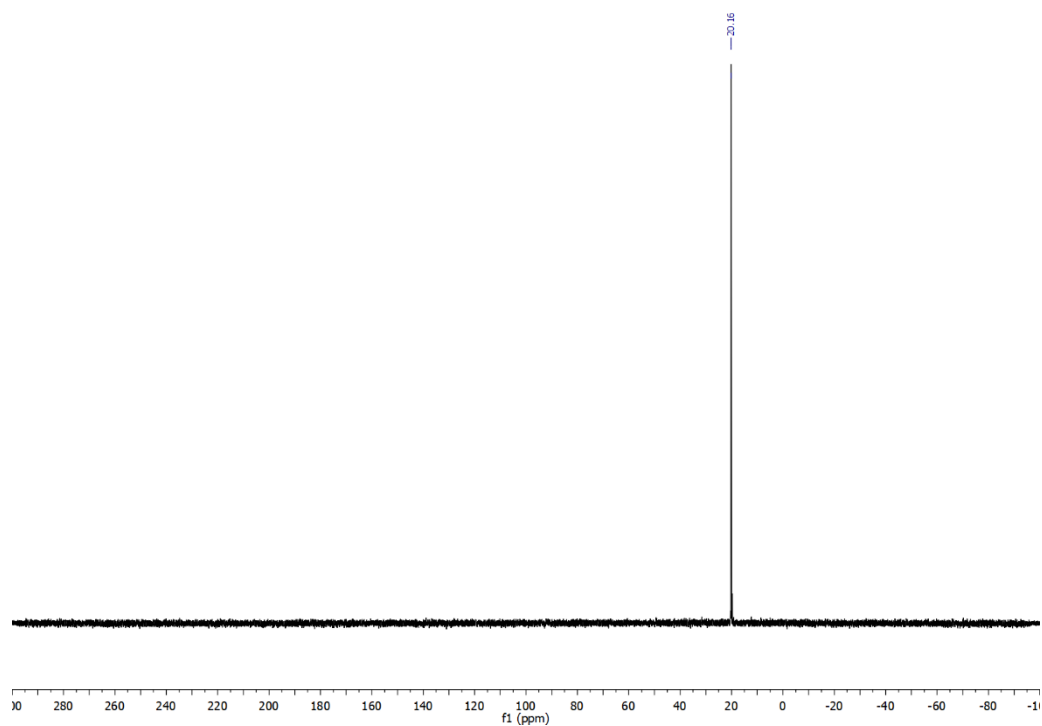

S 57. <sup>31</sup>P{<sup>1</sup>H} NMR spectra of compound **6d-Cyic** in CDCl<sub>3</sub> at 298K

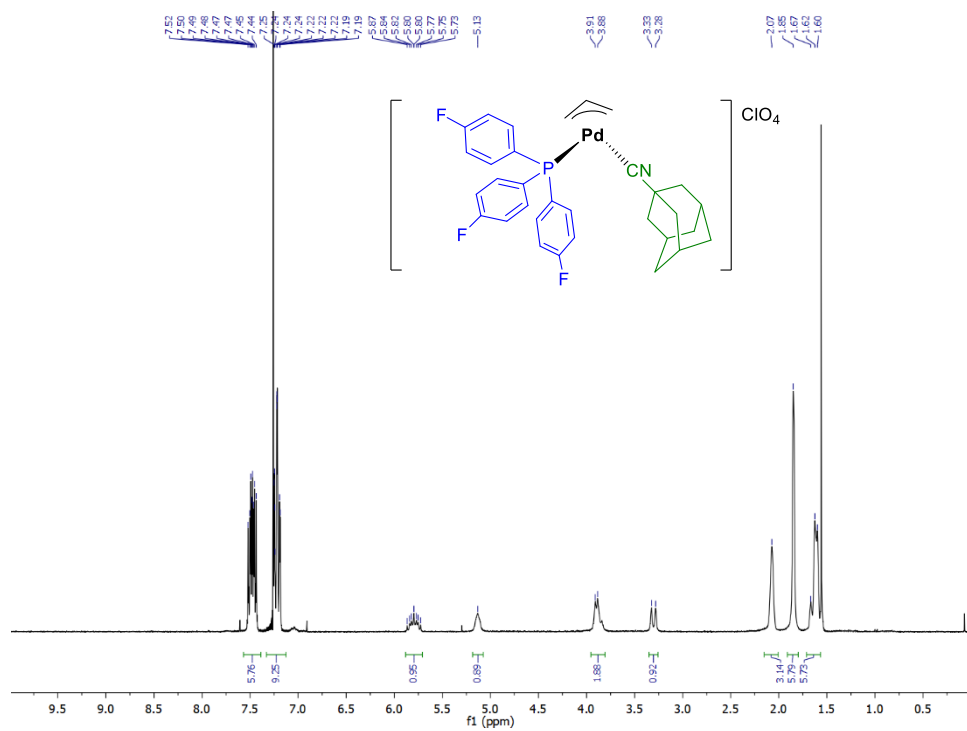

S 58. <sup>1</sup>H NMR spectra of compound **6c-Adic** in CDCl<sub>3</sub> at 298K

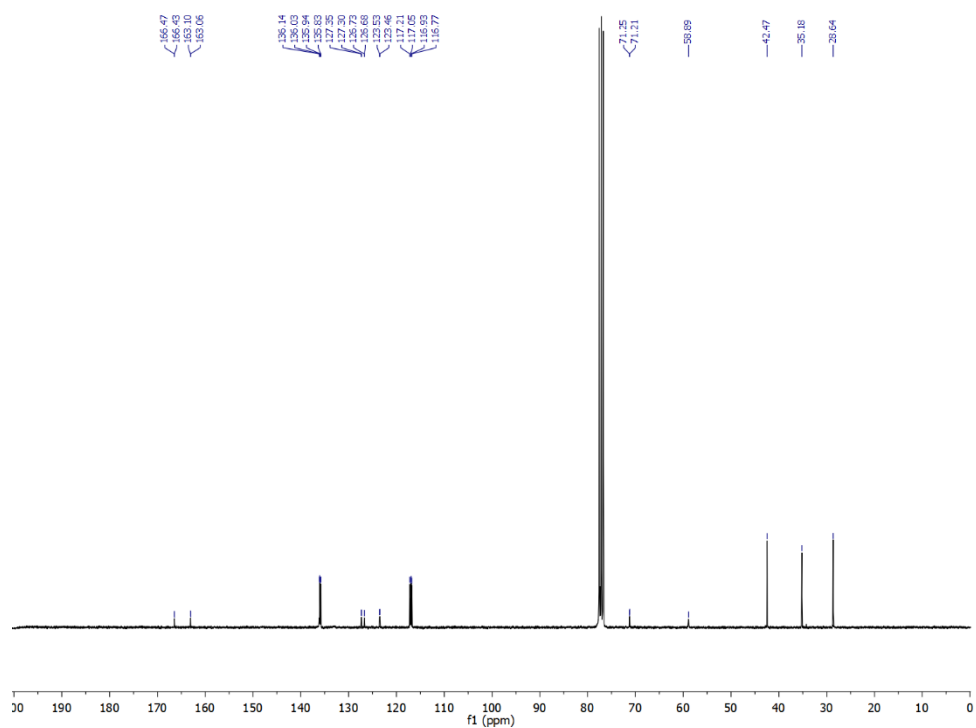

S 59.  $^{13}\text{C}\{^1\text{H}\}$  NMR spectra of compound **6c-Adic** in  $\text{CDCl}_3$  at 298K

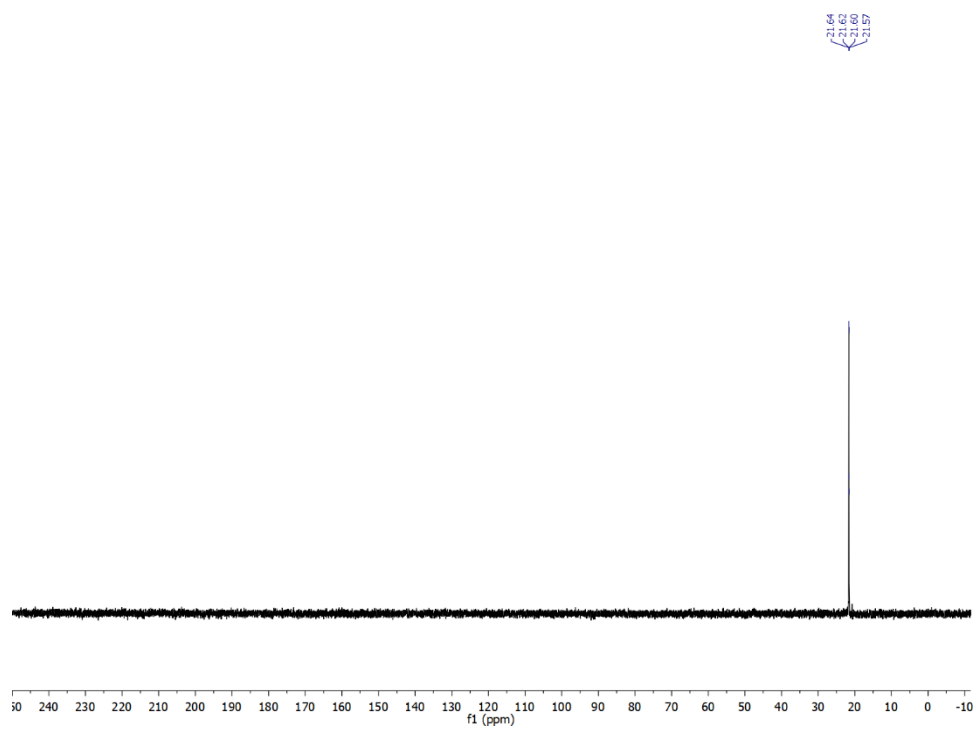

S 60.  $^{31}\text{P}\{^1\text{H}\}$  NMR spectra of compound **6c-Adic** in  $\text{CDCl}_3$  at 298K



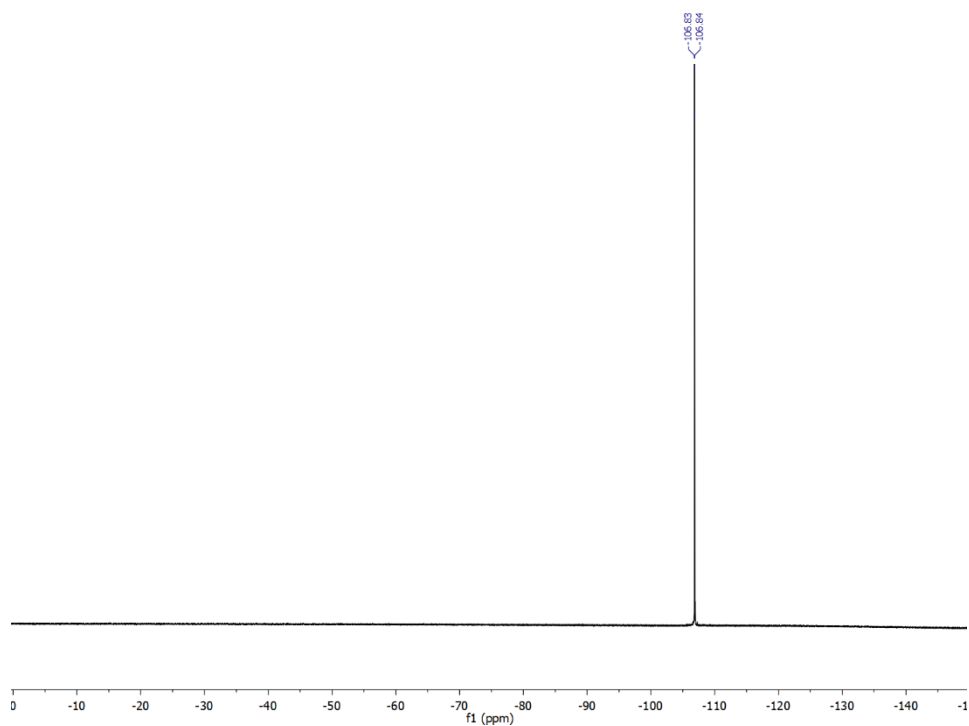

S 61.  $^{19}\text{F}\{^1\text{H}\}$  NMR spectra of compound **6c-Adic** in  $\text{CDCl}_3$  at 298K

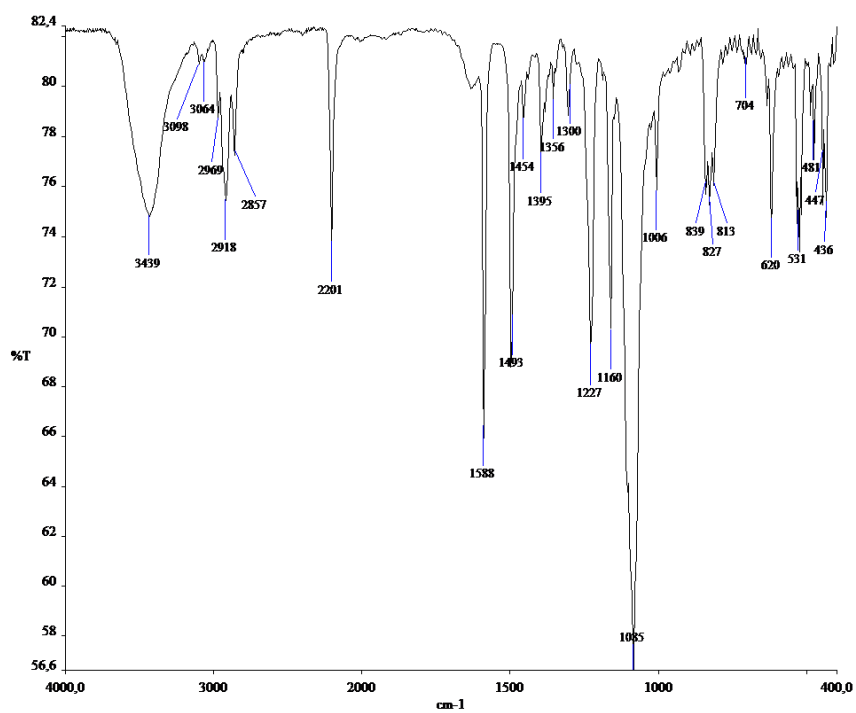

S 62. IR spectra of compound **6c-Adic**

Table S 1.  $\nu(\text{NC})_{\text{free}}$ ,  $\nu(\text{NC})_{\text{coord}}$  and  $\Delta\nu(\text{NC})$  values

| Compound      | $\nu(\text{NC})_{\text{coord}}$ ( $\text{cm}^{-1}$ ) | $\nu(\text{NC})_{\text{free}}$ ( $\text{cm}^{-1}$ ) | $\Delta\nu(\text{NC})$ ( $\text{cm}^{-1}$ ) |
|---------------|------------------------------------------------------|-----------------------------------------------------|---------------------------------------------|
| <b>3a-Tic</b> | 2212                                                 |                                                     | 75                                          |
| <b>3b-Tic</b> | 2213                                                 | 2137                                                | 76                                          |
| <b>3c-Tic</b> | 2201                                                 |                                                     | 64                                          |

|         |      |      |    |
|---------|------|------|----|
| 3d-Tic  | 2212 |      | 75 |
| 3a-Cyc  | 2207 |      | 67 |
| 3b-Cyc  | 2212 | 2140 | 72 |
| 3c-Cyc  | 2207 |      | 67 |
| 3d-Cyc  | 2207 |      | 67 |
| 3a-Adic | 2201 |      | 78 |
| 3b-Adic | 2207 | 2123 | 84 |
| 3c-Adic | 2218 |      | 95 |
| 3d-Adic | 2212 |      | 89 |

## Hapticity evaluation

Table S 2.  $C^{3a}$  and  $C^{7a}$  chemical shifts data and  $\Delta\delta^{13}C$  values and HA, FA and  $\Delta M-C$  values calculated by X-ray crystal structures

| Compound | $\delta C^{3a}$ | $\delta C^{7a}$ | $\Delta\delta^{13}C$ | HA (°) | FA (°) | $\Delta M-C$ (Å) |
|----------|-----------------|-----------------|----------------------|--------|--------|------------------|
| 3a-Tic   | 130.6           | 131.8           | 0.50                 | 13.53  | 9.20   | 0.282            |
| 3b-Tic   | 131.0           | 132.0           | 0.80                 | 13.11  | 11.18  | 0.269            |
| 3c-Tic   | 131.3           | 132.4           | 1.15                 | 14.10  | 12.33  | 0.294            |
| 3d-Tic   | 130.3           | 131.7           | 0.30                 | 13.75  | 12.23  | 0.288            |
| 3a-Cyc   | 130.6           | 131.8           | 0.50                 | 13.36  | 10.29  | 0.281            |
| 3b-Cyc   | 131.0           | 131.9           | 0.75                 | -      | -      | -                |
| 3c-Cyc   | 130.9           | 131.9           | 0.70                 | 14.21  | 12.36  | 0.297            |
| 3d-Cyc   | 130.5           | 131.8           | 0.45                 | -      | -      | -                |
| 3a-Adic  | 130.7           | 131.9           | 0.60                 | -      | -      | -                |
| 3b-Adic  | 131.0           | 132.0           | 0.80                 | -      | -      | -                |
| 3c-Adic  | 131.0           | 132.0           | 0.80                 | -      | -      | -                |
| 3d-Adic  | 130.5           | 131.8           | 0.45                 | 13.82  | 13.56  | 0.311            |

$\Delta\delta^{13}C = \left( \frac{\delta C^{3a} + \delta C^{7a}}{2} Ind \right) - \left( \frac{\delta C^{3a} + \delta C^{7a}}{2} Na - Ind \right)$ ; HA (Hinge Angle): is the angle formed between the planes formed by the atoms  $C^1, C^2, C^3$  and  $C^1, C^3, C^{3a}, C^{7a}$ ; FA (Fold Angle): is the angle formed between the planes formed by the atoms  $C^1, C^2, C^3$  and  $C^{3a}, C^4, C^5, C^6, C^7, C^{7a}$ ;  $\Delta M - C = \left( \frac{M - C^{3a} - M - C^{7a}}{2} \right) - \left( \frac{M - C^1 + M - C^3}{2} \right)$

## NMR reactivity data

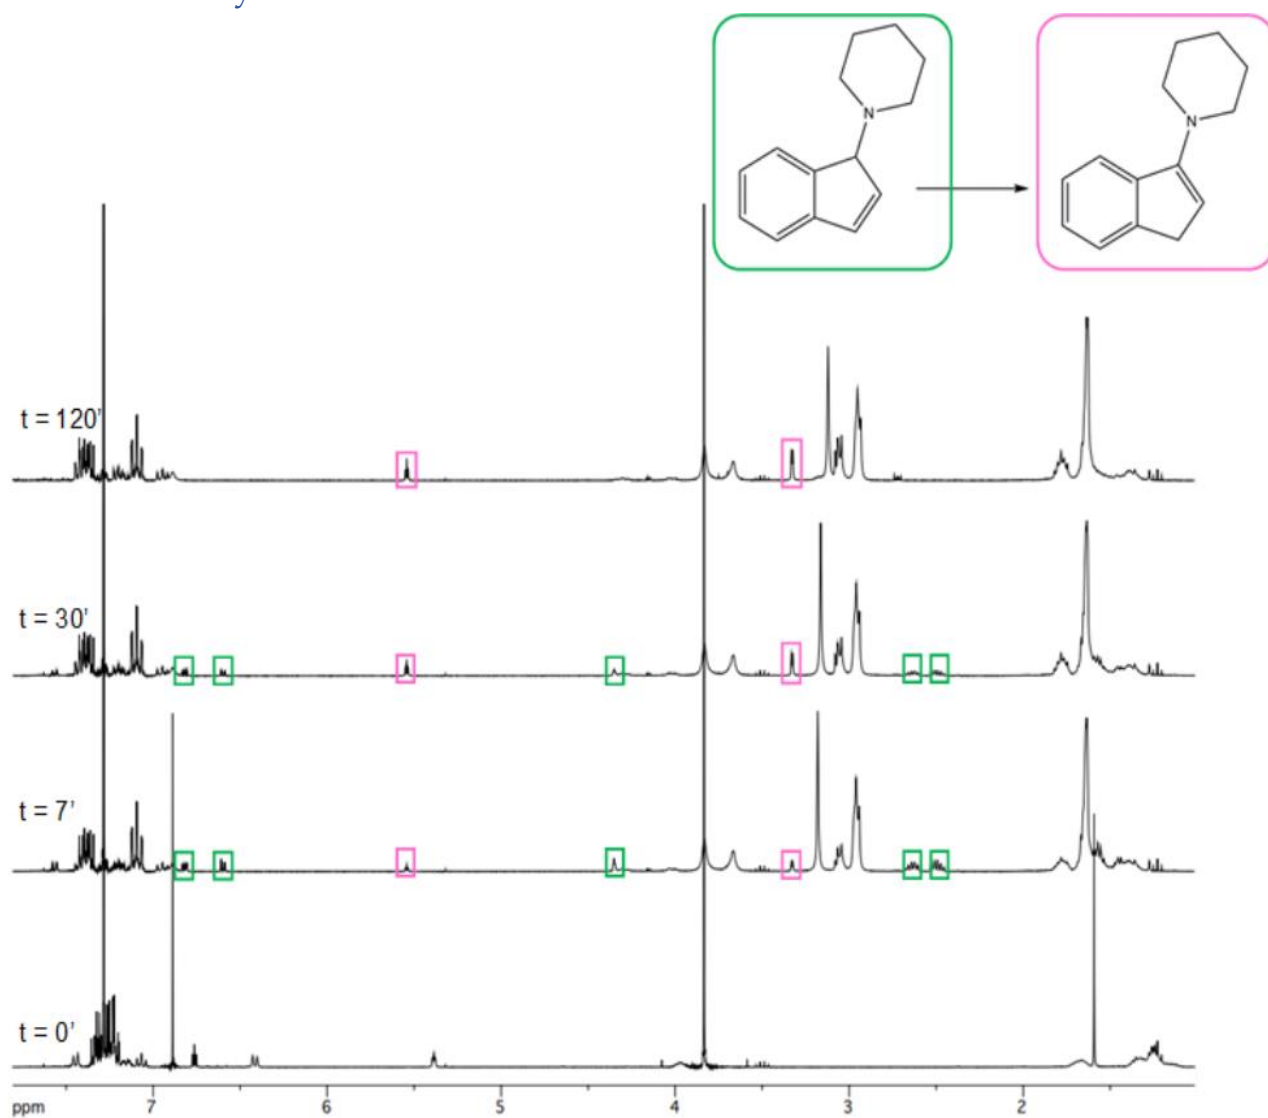

S 63. Amination reaction of compound **3c-Cyic** monitored by NMR spectroscopy ( $^1\text{H}$  NMR spectra in  $\text{CDCl}_3$  at 298 K)

## HRMS data

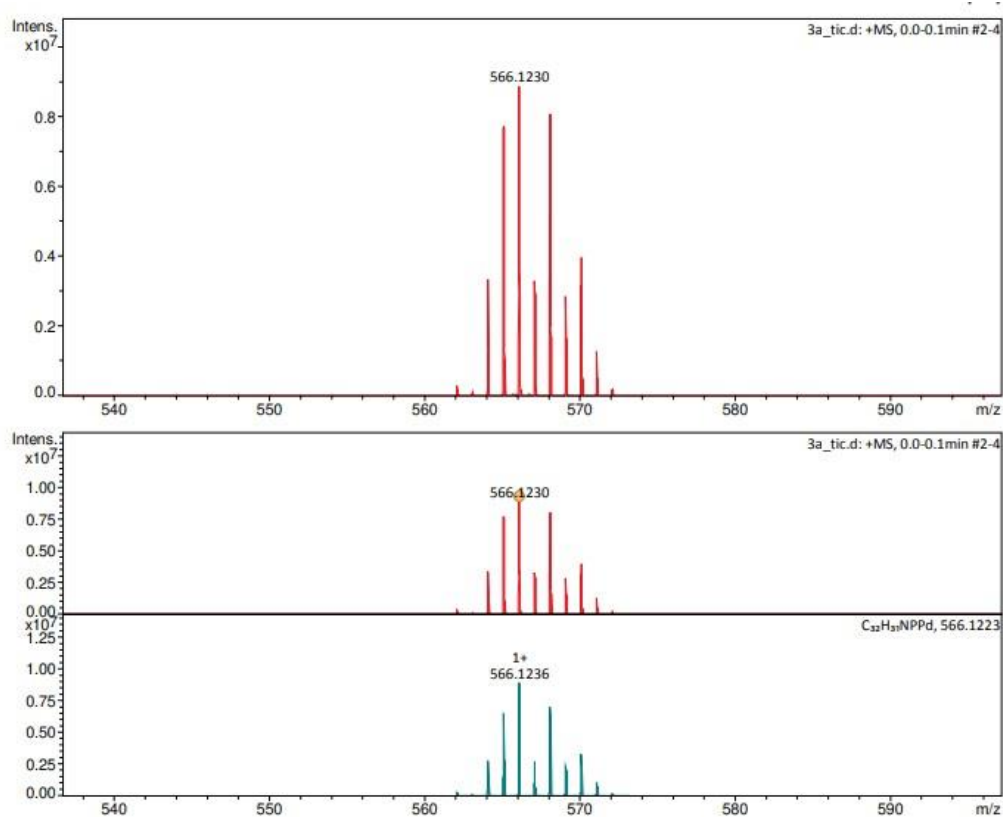

S 64. HRMS spectra of compound **3a-Tic**

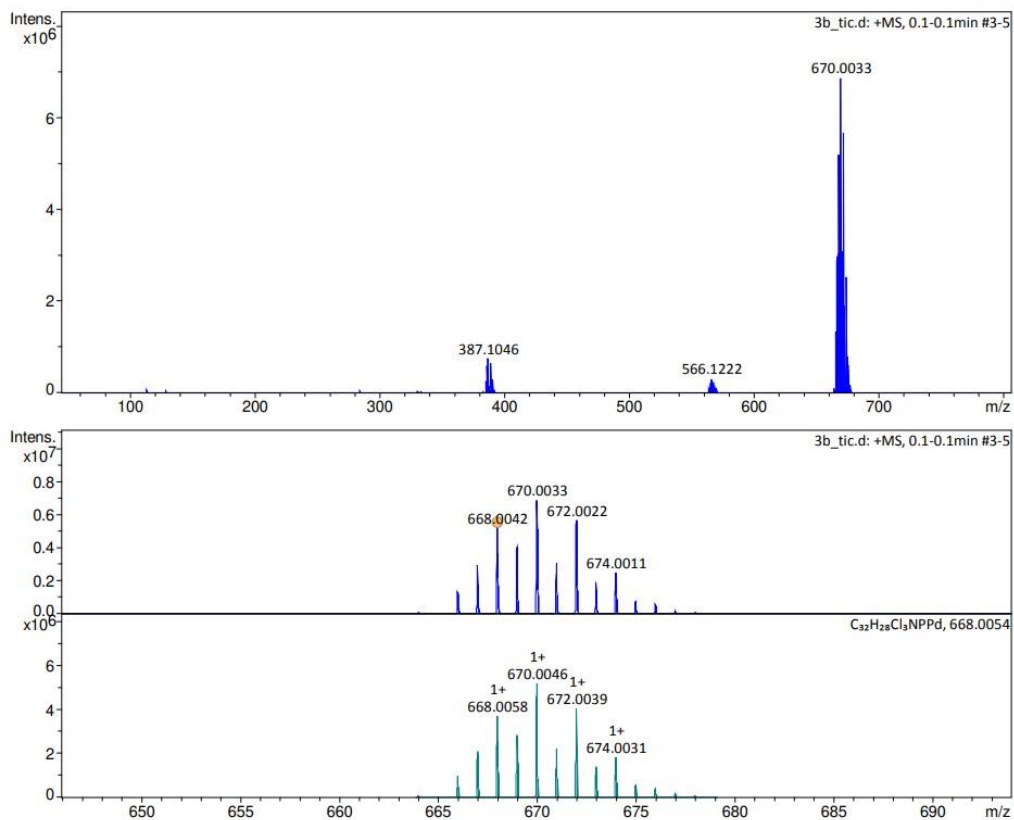

S 65. HRMS spectra of compound **3b-Tic**

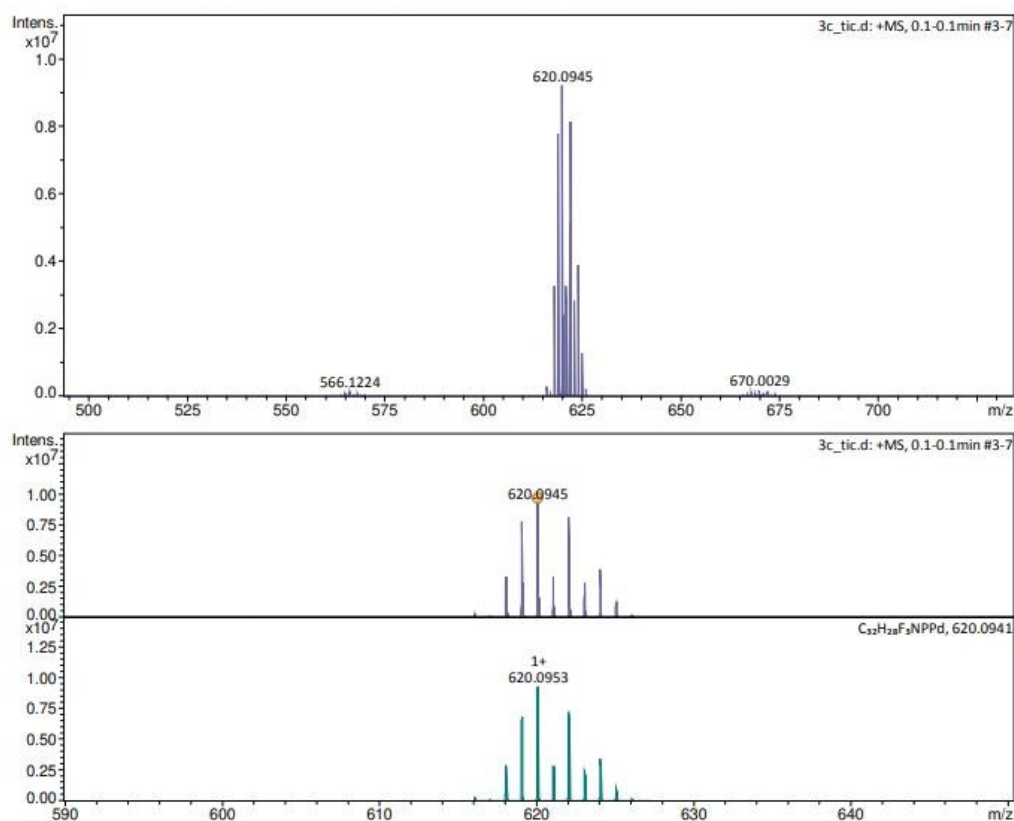

S 66. HRMS spectra of compound **3c-Tic**

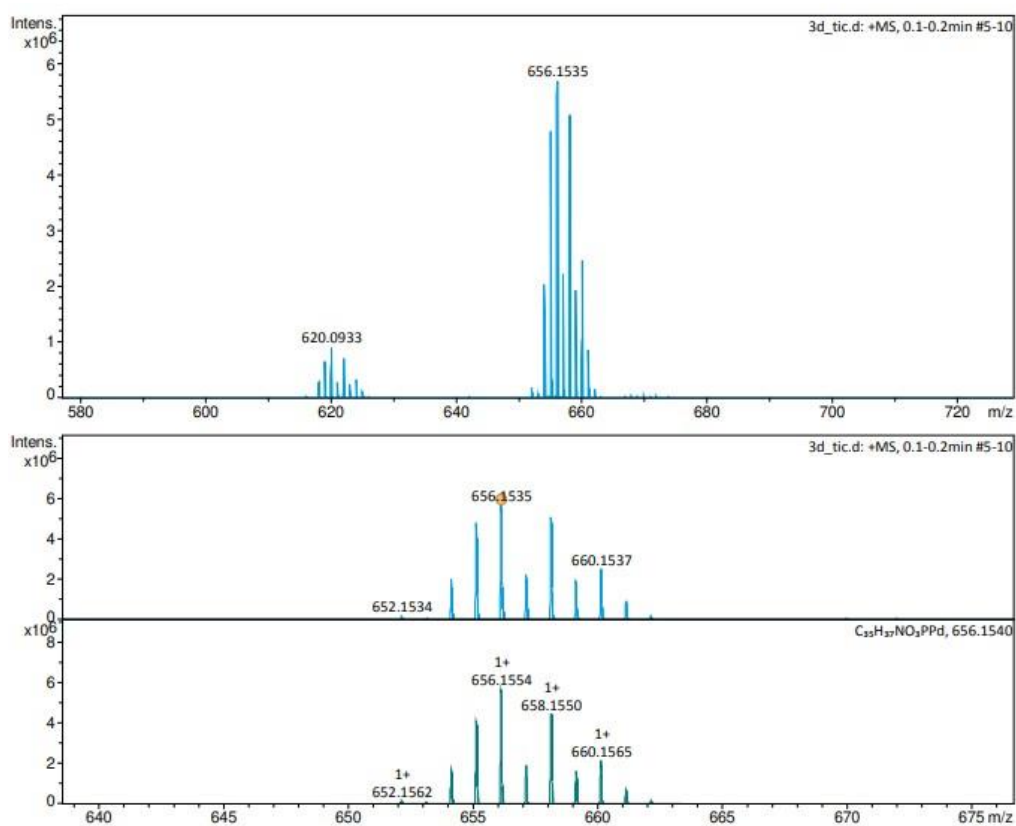

S 67. HRMS spectra of compound **3d-Tic**

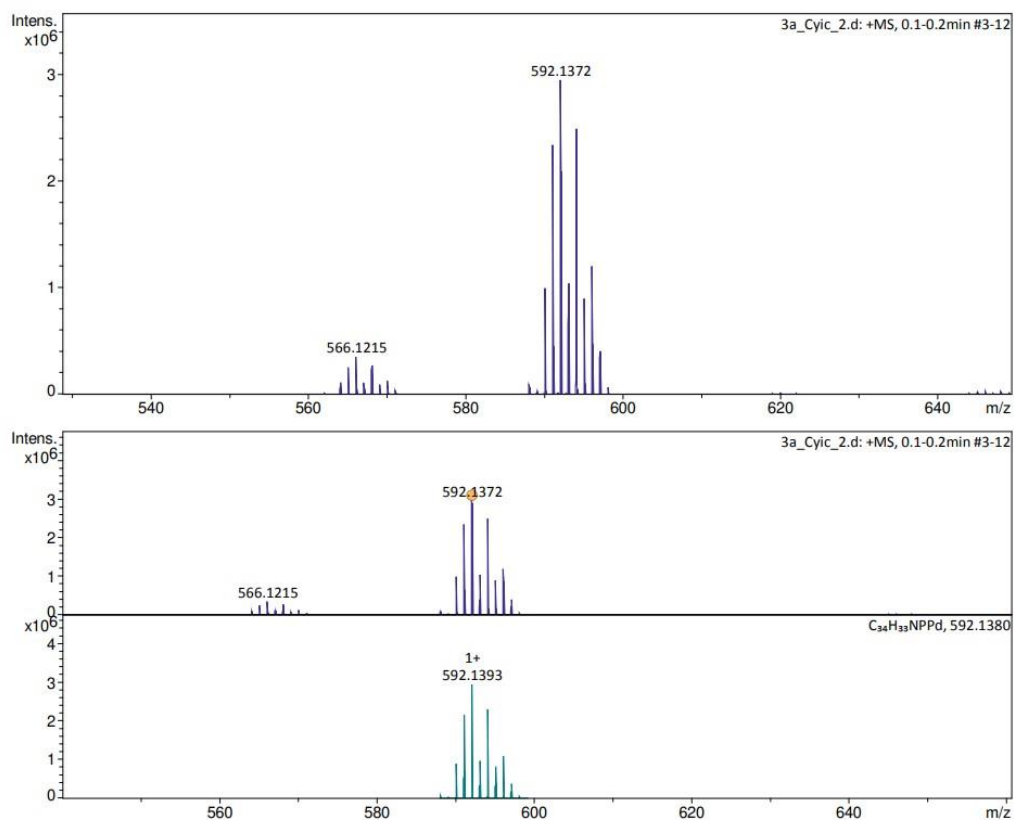

S 68. HRMS spectra of compound **3a-Cyic**

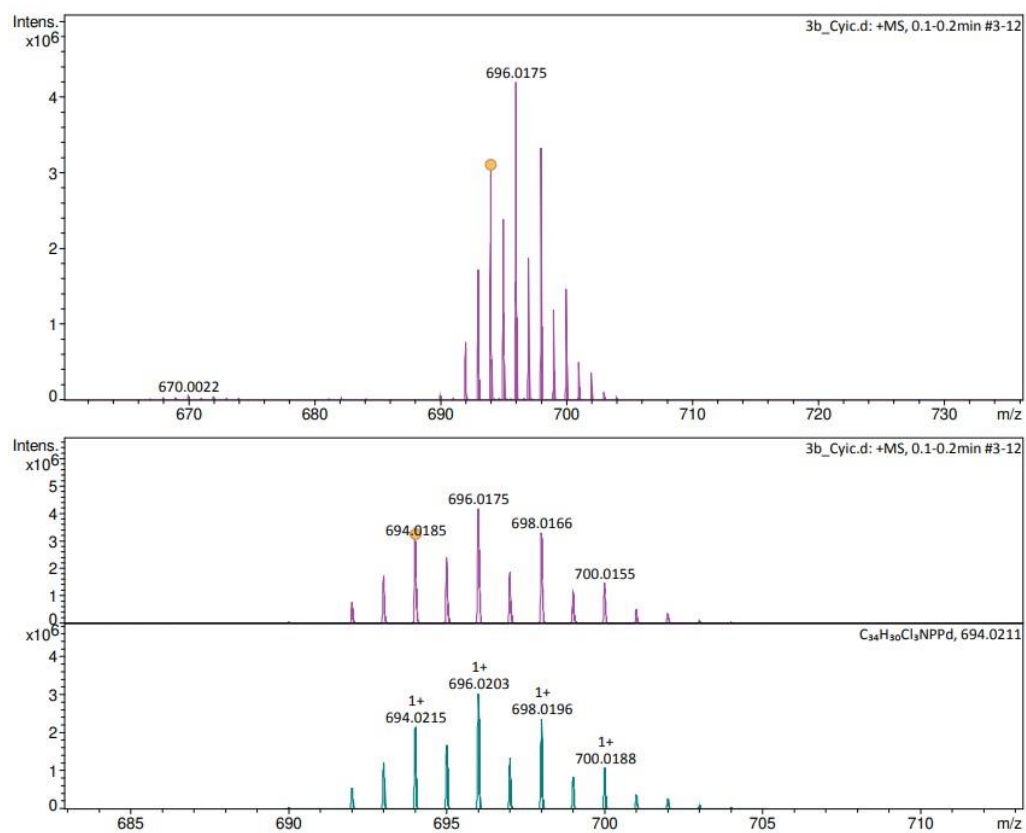

S 69. HRMS spectra of compound **3b-Cyic**

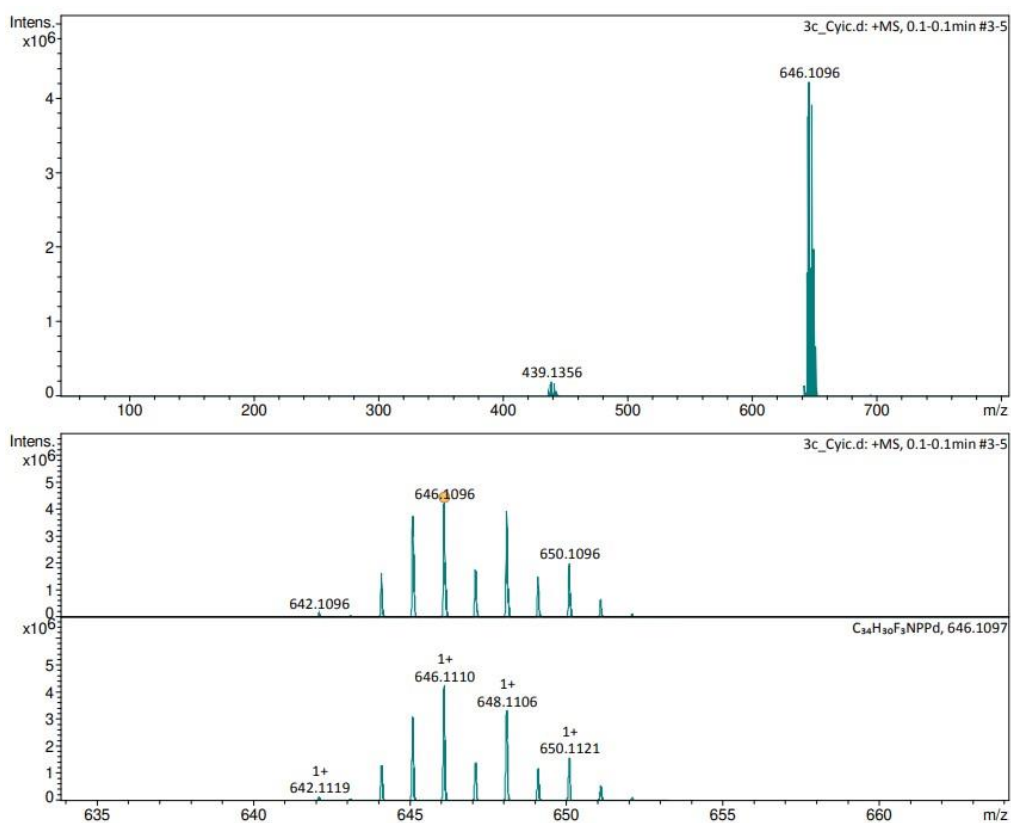

S 70. HRMS spectra of compound **3c-Cyic**

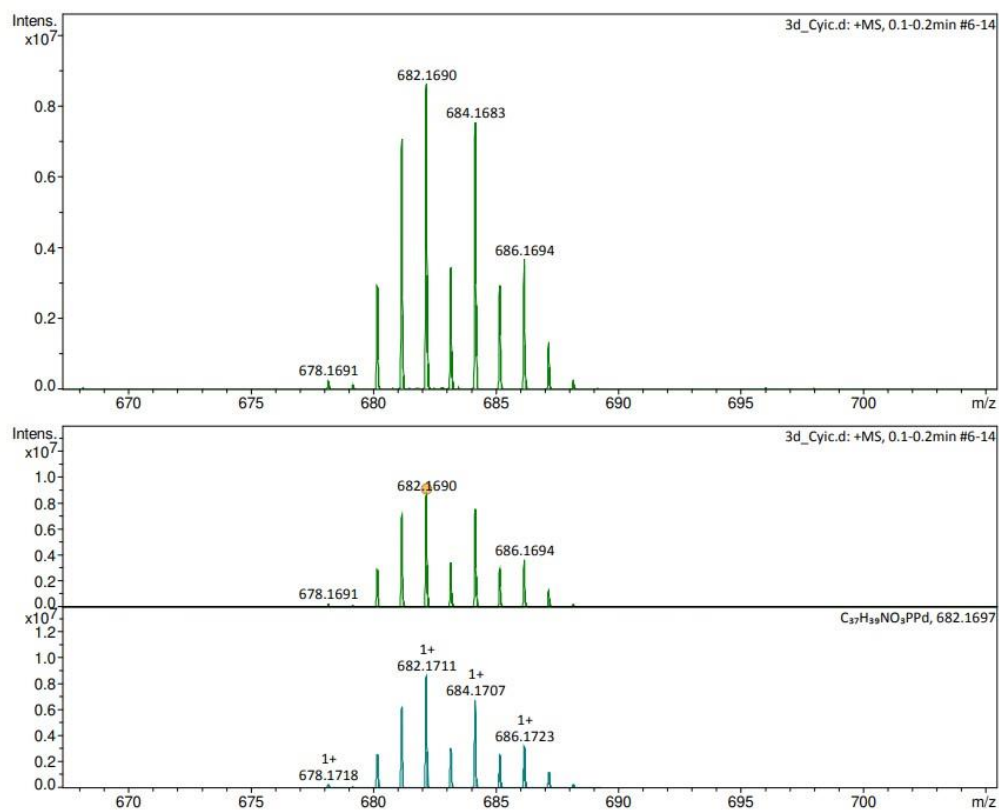

S 71. HRMS spectra of compound **3d-Cyic**

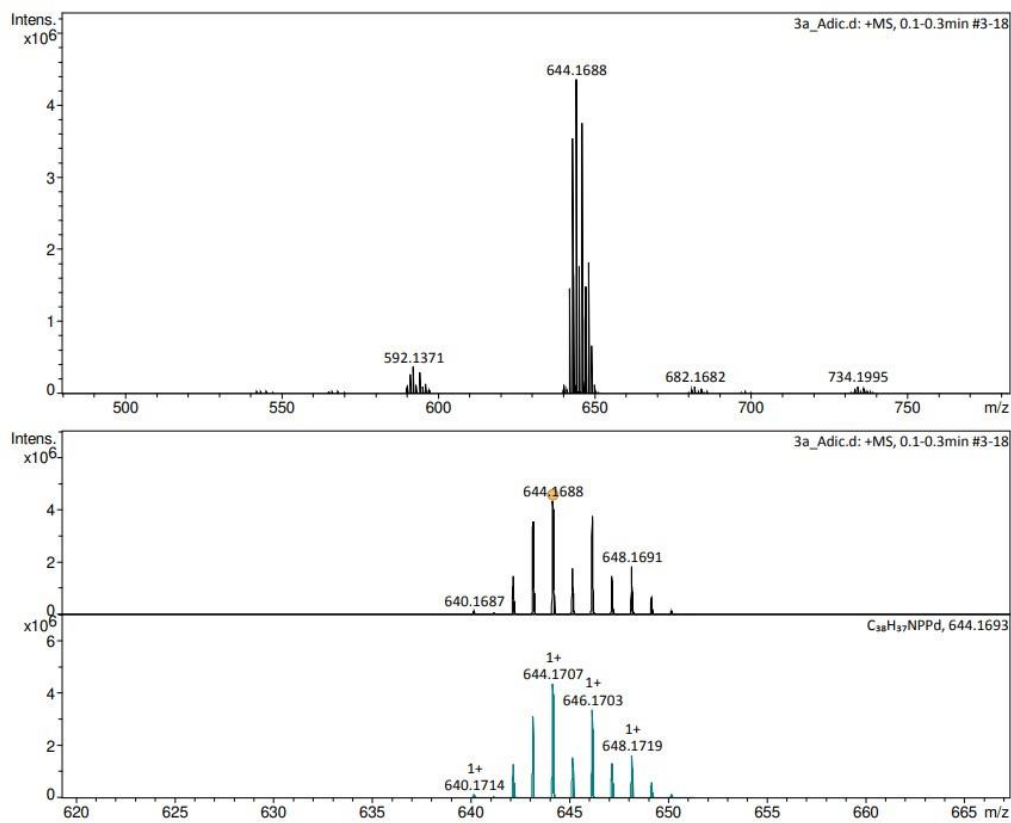

S 72. HRMS spectra of compound **3a-Adic**

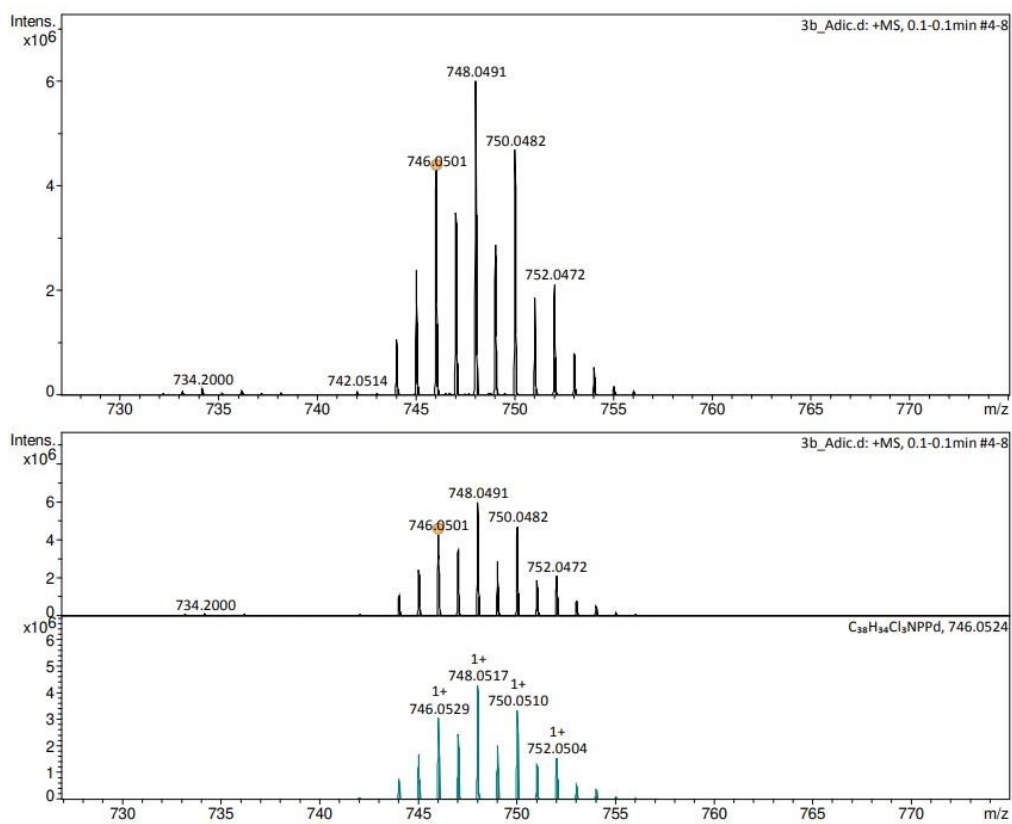

S 73. HRMS spectra of compound **3b-Adic**



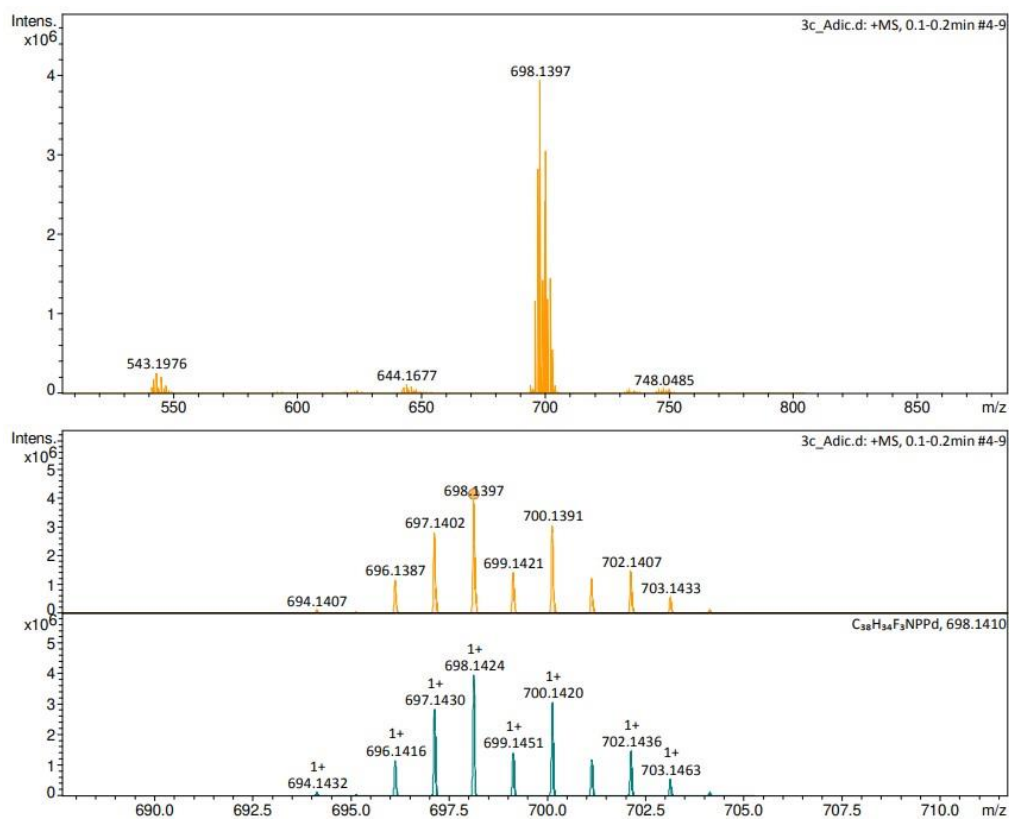

S 74. HRMS spectra of compound **3c-Adic**

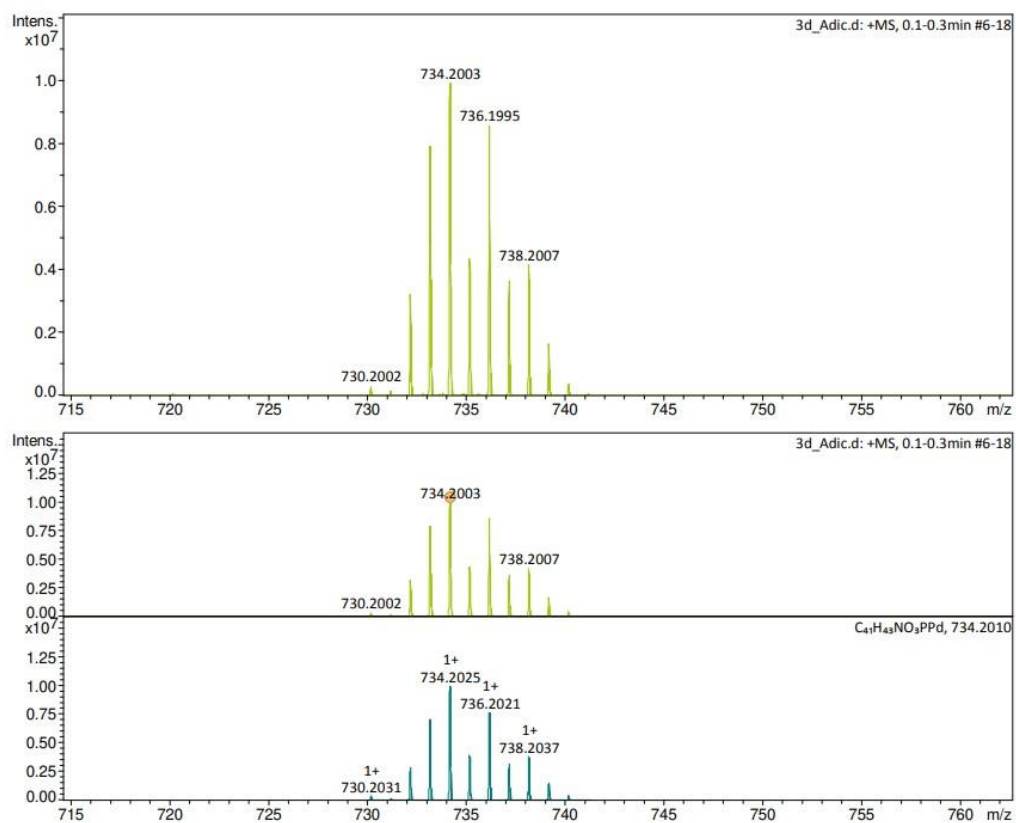

S 75. HRMS spectra of compound **3d-Adic**

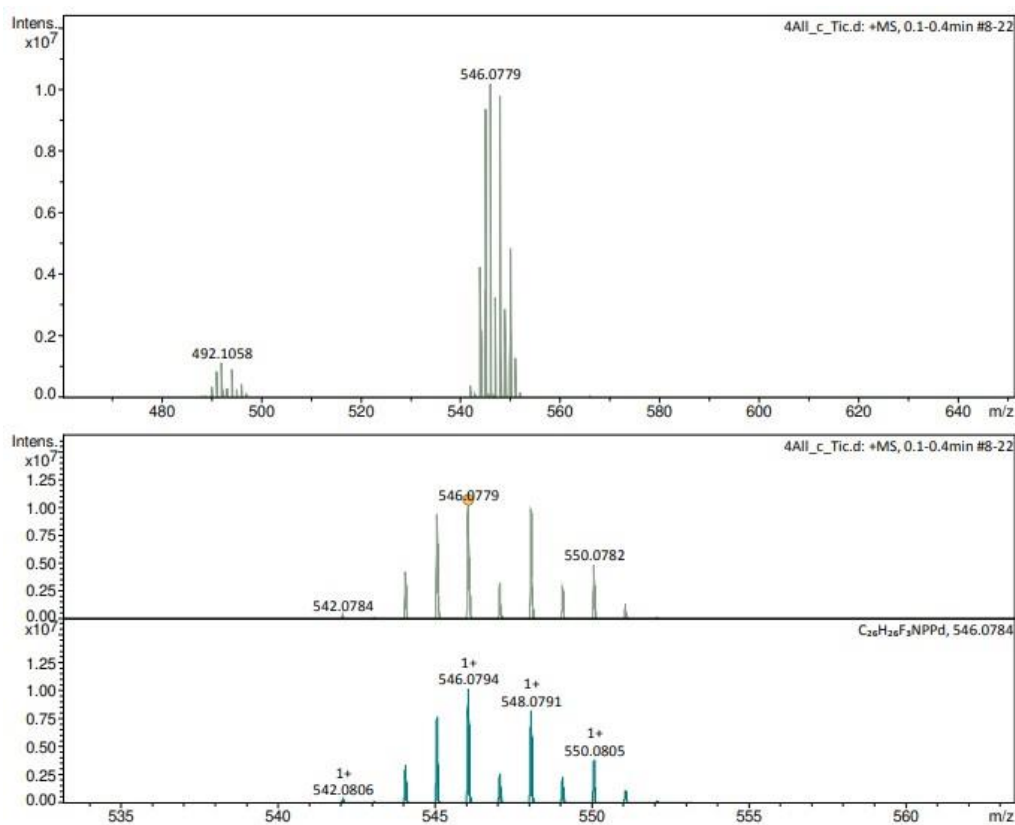

S 76. HRMS spectra of compound **6c-Tic**

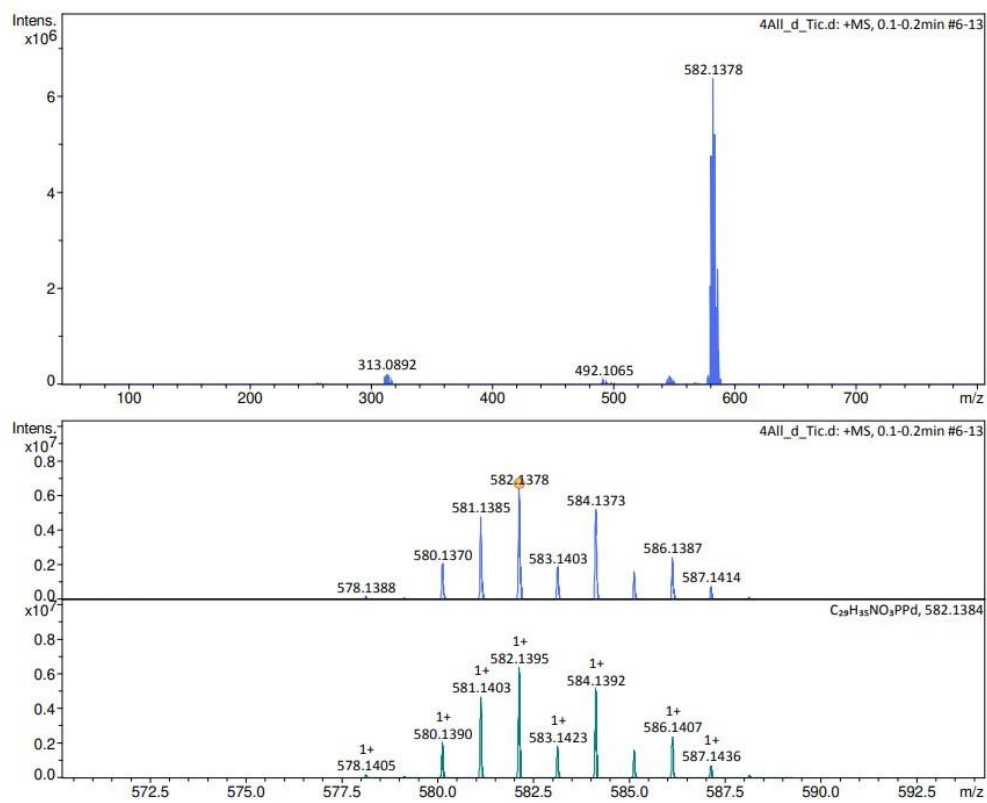

S 77. HRMS spectra of compound **6d-Tic**

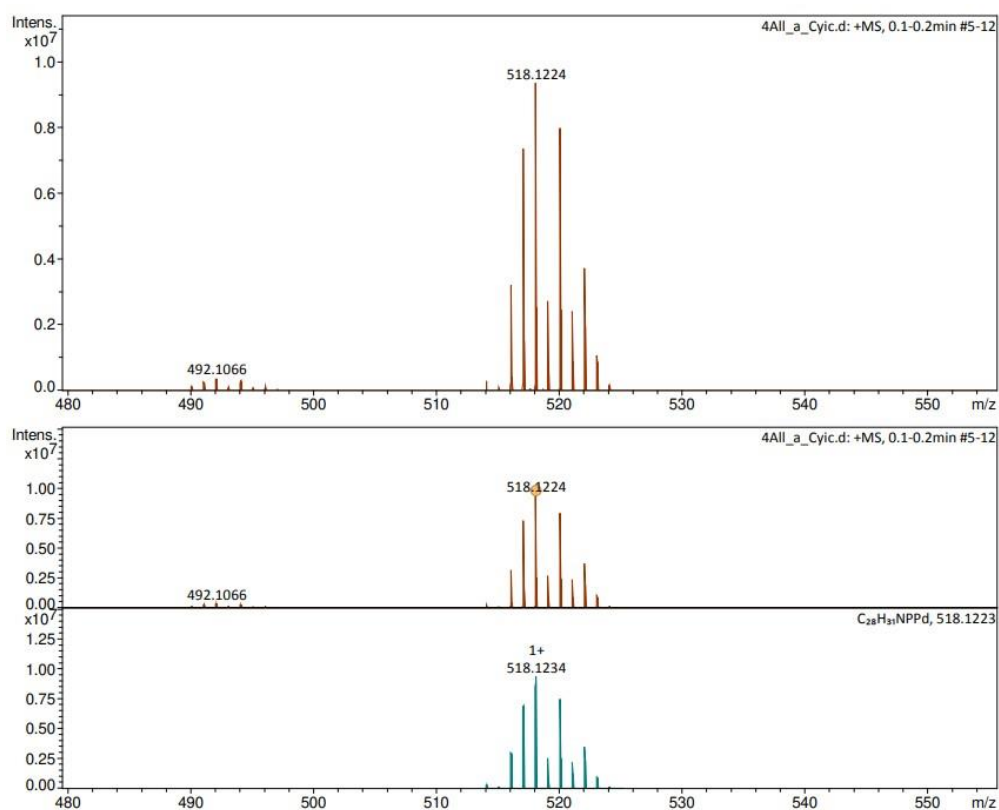

S 78. HRMS spectra of compound **6a-Cyic**

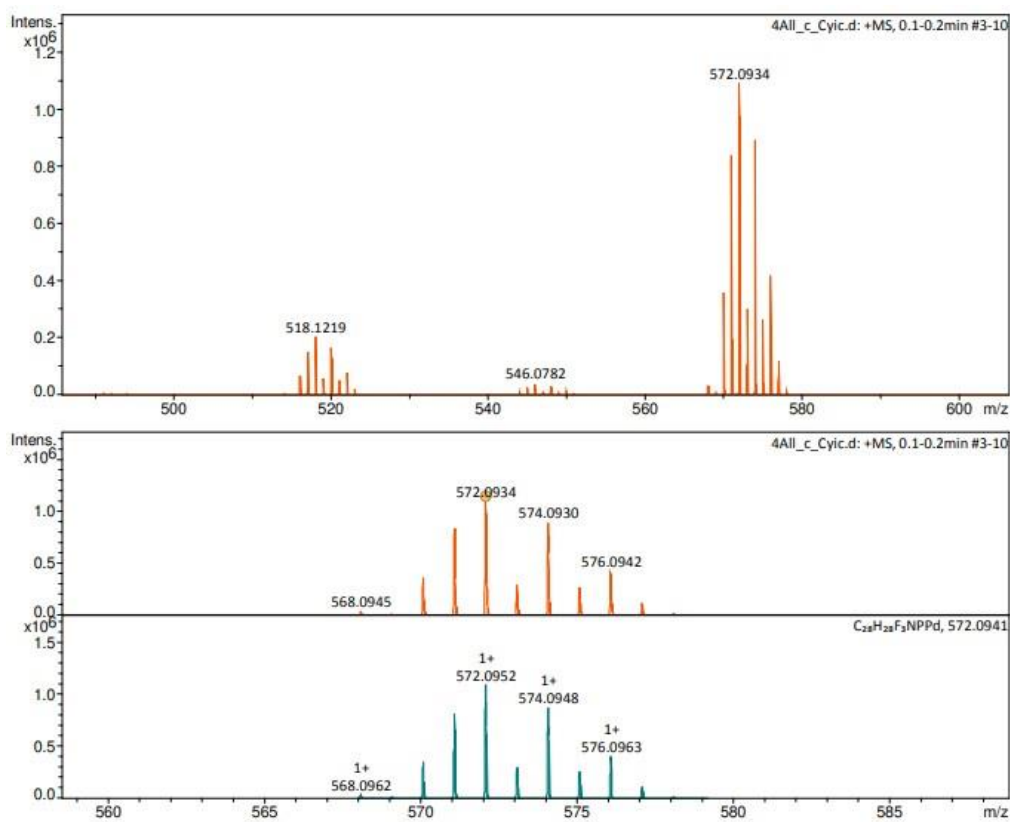

S 79. HRMS spectra of compound **6c-Cyic**

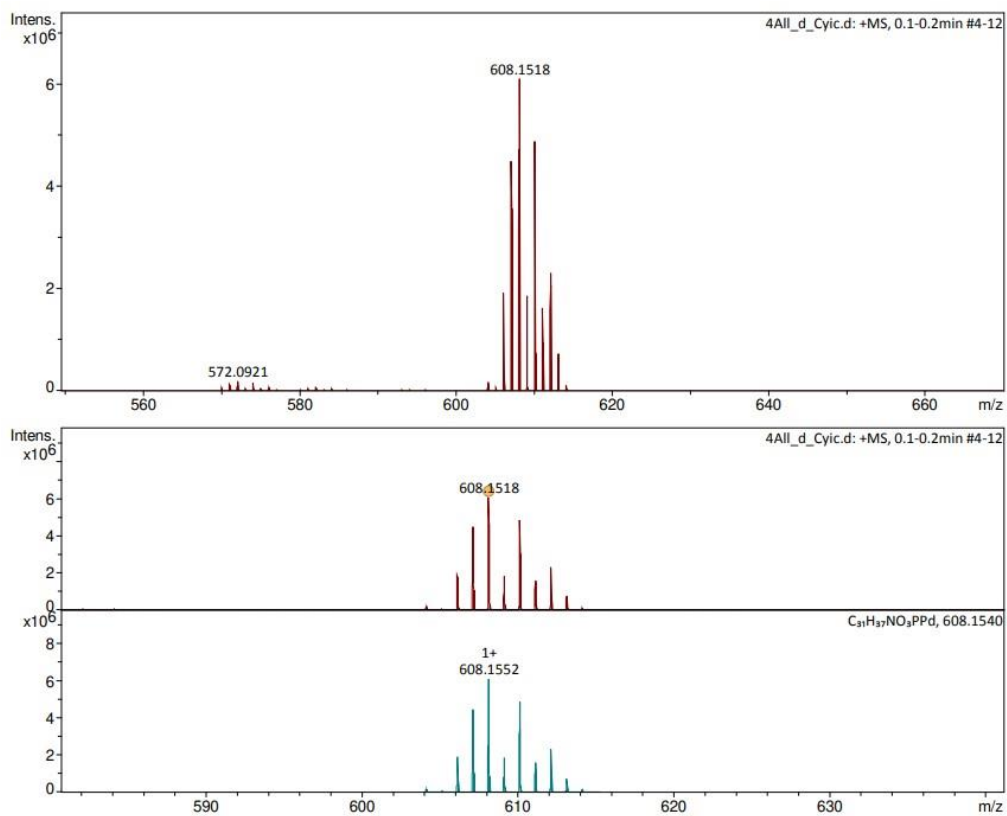

S 80. HRMS spectra of compound **6d-Cyic**

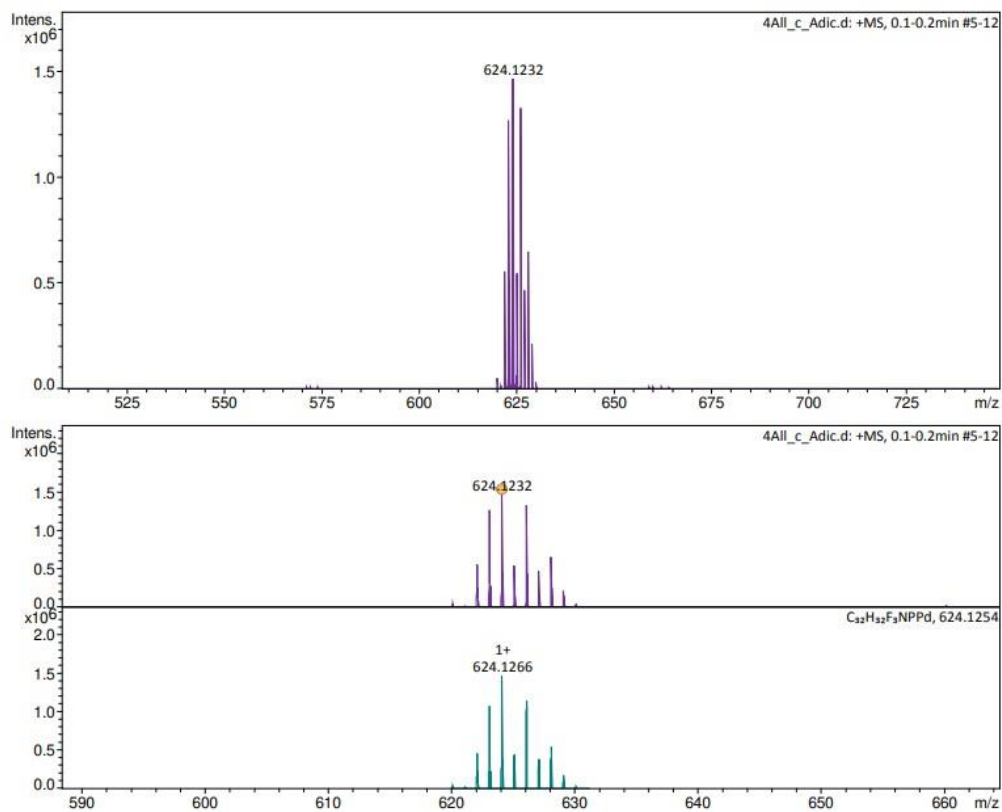

S 81. HRMS spectra of compound **6c-Adic**

# Crystal Structure Determination

Table S 3. Crystallographic data

| Compound                                                 | 3a-Tic@100 K                                                                    | 3c-Tic@100 K                                                             | 3d-Tic@100 K                                                             | i3d-Tic@100 K                                                            | 3b-Tic@298 K                                                              |
|----------------------------------------------------------|---------------------------------------------------------------------------------|--------------------------------------------------------------------------|--------------------------------------------------------------------------|--------------------------------------------------------------------------|---------------------------------------------------------------------------|
| Formula                                                  | [PdC <sub>32</sub> H <sub>31</sub> NP](ClO <sub>4</sub> )<br>·CHCl <sub>3</sub> | [PdC <sub>32</sub> H <sub>28</sub> F <sub>3</sub> NP](ClO <sub>4</sub> ) | [PdC <sub>35</sub> H <sub>37</sub> NO <sub>3</sub> P](ClO <sub>4</sub> ) | [PdC <sub>35</sub> H <sub>37</sub> NO <sub>3</sub> P](ClO <sub>4</sub> ) | [PdC <sub>32</sub> H <sub>28</sub> Cl <sub>3</sub> NP](ClO <sub>4</sub> ) |
| M/g·mol <sup>-1</sup>                                    | 785.76                                                                          | 720.37                                                                   | 756.47                                                                   | 756.47                                                                   | 7769.72                                                                   |
| Space group                                              | <i>P</i> 2 <sub>1</sub>                                                         | <i>P</i> 2 <sub>1</sub> /c                                               | <i>P</i> ca2 <sub>1</sub>                                                | <i>P</i> ca2 <sub>1</sub>                                                | <i>P</i> 2 <sub>1</sub> /n                                                |
| Crystal system                                           | Monoclinic                                                                      | Monoclinic                                                               | Orthorhombic                                                             | Orthorhombic                                                             | Monoclinic                                                                |
| <i>a</i> /Å                                              | 9.905(2)                                                                        | 15.006(3)                                                                | 19.569(4)                                                                | 19.544(4)                                                                | 10.170(2)                                                                 |
| <i>b</i> /Å                                              | 34.151(7)                                                                       | 10.701(2)                                                                | 9.821(2)                                                                 | 9.842(2)                                                                 | 18.904(4)                                                                 |
| <i>c</i> /Å                                              | 9.978(2)                                                                        | 18.944(4)                                                                | 17.575(4)                                                                | 17.561(4)                                                                | 17.274(3)                                                                 |
| $\alpha$ /°                                              | 90                                                                              | 90                                                                       | 90                                                                       | 90                                                                       | 90                                                                        |
| $\beta$ /°                                               | 90.58(3)                                                                        | 95.65(3)                                                                 | 90                                                                       | 90                                                                       | 90.09(3)                                                                  |
| $\gamma$ /°                                              | 90                                                                              | 90                                                                       | 90                                                                       | 90                                                                       | 90                                                                        |
| <i>V</i> /Å <sup>3</sup>                                 | 3375.0(12)                                                                      | 3027.2(11)                                                               | 3377.7(12)                                                               | 3377.9(12)                                                               | 3321.0(11)                                                                |
| <i>Z</i>                                                 | 4                                                                               | 4                                                                        | 4                                                                        | 4                                                                        | 4                                                                         |
| T/K                                                      | 100(2)                                                                          | 100(2)                                                                   | 100(2)                                                                   | 100(2)                                                                   | 298(2)                                                                    |
| <i>D</i> /g·cm <sup>-3</sup>                             | 1.546                                                                           | 1.581                                                                    | 1.488                                                                    | 1.488                                                                    | 1.539                                                                     |
| <i>F</i> (000)                                           | 1592                                                                            | 1456                                                                     | 1552                                                                     | 1552                                                                     | 1552                                                                      |
| $\mu$ /mm <sup>-1</sup>                                  | 0.647                                                                           | 0.556                                                                    | 0.497                                                                    | 0.497                                                                    | 0.656                                                                     |
| Measured Reflections                                     | 79911                                                                           | 66652                                                                    | 77299                                                                    | 77478                                                                    | 78135                                                                     |
| Unique Reflections                                       | 28759                                                                           | 13152                                                                    | 15352                                                                    | 15086                                                                    | 14452                                                                     |
| <i>R</i> <sub>int</sub>                                  | 0.0357                                                                          | 0.0296                                                                   | 0.0194                                                                   | 0.0388                                                                   | 0.0341                                                                    |
| Obs. Refl.ns [ <i>I</i> ≥2σ( <i>I</i> )]                 | 27801                                                                           | 12859                                                                    | 14379                                                                    | 13238                                                                    | 8661                                                                      |
| $\theta_{\min}$ – $\theta_{\max}$ /°                     | 1.04 – 31.12                                                                    | 1.19 – 31.10                                                             | 1.81 – 31.10                                                             | 1.81 – 31.10                                                             | 1.39 – 31.10                                                              |
| <i>hkl</i> ranges                                        | -15,15; -56,56; -16,16                                                          | -24,25; -17,17; -28,29                                                   | -32,32; -15,15; -27,27                                                   | -30,30; -16,16; -29,29                                                   | -16,16; -31,31; -26,26                                                    |
| <i>R</i> ( <i>F</i> <sup>2</sup> ) (Obs.Refl.ns)         | 0.0343                                                                          | 0.0262                                                                   | 0.0252                                                                   | 0.0332                                                                   | 0.0591                                                                    |
| <i>wR</i> ( <i>F</i> <sup>2</sup> ) (All Refl.ns)        | 0.0866                                                                          | 0.0690                                                                   | 0.0660                                                                   | 0.0861                                                                   | 0.2077                                                                    |
| No. Variables                                            | 799                                                                             | 392                                                                      | 467                                                                      | 467                                                                      | 404                                                                       |
| Goodness of fit                                          | 1.008                                                                           | 1.076                                                                    | 1.062                                                                    | 1.083                                                                    | 1.031                                                                     |
| $\Delta Q_{\max}$ ; $\Delta Q_{\min}$ /e·Å <sup>-3</sup> | 2.23; -1.45                                                                     | 0.67; -1.09                                                              | 0.99; -1.07                                                              | 0.76; -1.47                                                              | 1.07; -1.24                                                               |
| CCDC Deposition N.                                       | 2290052                                                                         | 2290053                                                                  | 2290054                                                                  | 2290061                                                                  | 2290055                                                                   |

  

| Compound                                                 | 3c-Cyic@100 K                                                            | 3d-Adic@100 K                                                            | 3d-Adic@298 K                                                            | 3a-Cyic@100 K                                             | 3a-Cyic@298 K                                             |
|----------------------------------------------------------|--------------------------------------------------------------------------|--------------------------------------------------------------------------|--------------------------------------------------------------------------|-----------------------------------------------------------|-----------------------------------------------------------|
| Formula                                                  | [PdC <sub>34</sub> H <sub>30</sub> F <sub>3</sub> NP](ClO <sub>4</sub> ) | [PdC <sub>41</sub> H <sub>43</sub> NO <sub>3</sub> P](ClO <sub>4</sub> ) | [PdC <sub>41</sub> H <sub>43</sub> NO <sub>3</sub> P](ClO <sub>4</sub> ) | [PdC <sub>34</sub> H <sub>33</sub> NP](ClO <sub>4</sub> ) | [PdC <sub>34</sub> H <sub>33</sub> NP](ClO <sub>4</sub> ) |
| M/g·mol <sup>-1</sup>                                    | 746.41                                                                   | 834.58                                                                   | 834.58                                                                   | 692.43                                                    | 692.43                                                    |
| Space group                                              | <i>P</i> 2 <sub>1</sub> /c                                               | <i>P</i> -1                                                              | <i>P</i> -1                                                              | <i>P</i> 2 <sub>1</sub> /c                                | <i>P</i> 2 <sub>1</sub> /c                                |
| Crystal system                                           | Monoclinic                                                               | Triclinic                                                                | Triclinic                                                                | Monoclinic                                                | Monoclinic                                                |
| <i>a</i> /Å                                              | 15.295(3)                                                                | 12.091(2)                                                                | 12.186(2)                                                                | 14.982(3)                                                 | 15.157(3)                                                 |
| <i>b</i> /Å                                              | 10.691(2)                                                                | 12.295(2)                                                                | 12.335(2)                                                                | 13.237(3)                                                 | 13.336(3)                                                 |
| <i>c</i> /Å                                              | 19.120(4)                                                                | 12.729(3)                                                                | 13.003(3)                                                                | 16.829(3)                                                 | 17.127(3)                                                 |
| $\alpha$ /°                                              | 90                                                                       | 82.90(3)                                                                 | 83.54(3)                                                                 | 90                                                        | 90                                                        |
| $\beta$ /°                                               | 99.74(3)                                                                 | 82.85(3)                                                                 | 81.05(3)                                                                 | 112.78(3)                                                 | 112.74(3)                                                 |
| $\gamma$ /°                                              | 90                                                                       | 89.24(3)                                                                 | 88.43(3)                                                                 | 90                                                        | 90                                                        |
| <i>V</i> /Å <sup>3</sup>                                 | 3081.5(11)                                                               | 1863.0(7)                                                                | 1918.6(7)                                                                | 3077.2(12)                                                | 3192.8(13)                                                |
| <i>Z</i>                                                 | 4                                                                        | 2                                                                        | 2                                                                        | 4                                                         | 4                                                         |
| T/K                                                      | 100(2)                                                                   | 100(2)                                                                   | 298(2)                                                                   | 100(2)                                                    | 298(2)                                                    |
| <i>D</i> /g·cm <sup>-3</sup>                             | 1.609                                                                    | 1.488                                                                    | 1.445                                                                    | 1.495                                                     | 1.441                                                     |
| <i>F</i> (000)                                           | 1512                                                                     | 860                                                                      | 860                                                                      | 1416                                                      | 1416                                                      |
| $\mu$ /mm <sup>-1</sup>                                  | 0.548                                                                    | 0.457                                                                    | 0.444                                                                    | 0.535                                                     | 0.516                                                     |
| Measured Reflections                                     | 71053                                                                    | 63227                                                                    | 89581                                                                    | 34405                                                     | 75154                                                     |
| Unique Reflections                                       | 13566                                                                    | 16033                                                                    | 16038                                                                    | 13007                                                     | 14031                                                     |
| <i>R</i> <sub>int</sub>                                  | 0.0189                                                                   | 0.0631                                                                   | 0.0392                                                                   | 0.0395                                                    | 0.0314                                                    |
| Obs. Refl.ns [ <i>I</i> ≥2σ( <i>I</i> )]                 | 12785                                                                    | 13563                                                                    | 14298                                                                    | 11398                                                     | 11737                                                     |
| $\theta_{\min}$ – $\theta_{\max}$ /°                     | 1.18 – 31.10                                                             | 1.42– 31.17                                                              | 1.39 – 31.10                                                             | 1.76 – 31.10                                              | 1.74 – 31.09                                              |
| <i>hkl</i> ranges                                        | -25,25; -17,17; -31,31                                                   | -17,20; -19,20; -21,21                                                   | -18,18; -19,19; -20,20                                                   | -24,22; -21,21; -26,28                                    | -23,23; -21,21; -26,26                                    |
| <i>R</i> ( <i>F</i> <sup>2</sup> ) (Obs.Refl.ns)         | 0.0260                                                                   | 0.0431                                                                   | 0.0405                                                                   | 0.0746                                                    | 0.0351                                                    |
| <i>wR</i> ( <i>F</i> <sup>2</sup> ) (All Refl.ns)        | 0.0741                                                                   | 0.1214                                                                   | 0.1263                                                                   | 0.2458                                                    | 0.1150                                                    |
| No. Variables                                            | 406                                                                      | 519                                                                      | 569                                                                      | 409                                                       | 381                                                       |
| Goodness of fit                                          | 1.051                                                                    | 1.085                                                                    | 1.042                                                                    | 1.138                                                     | 1.041                                                     |
| $\Delta Q_{\max}$ ; $\Delta Q_{\min}$ /e·Å <sup>-3</sup> | 0.88; -1.24                                                              | 2.15; -1.59                                                              | 0.83; -0.92                                                              | 2.70; -4.08                                               | 0.69; -0.67                                               |
| CCDC Deposition N.                                       | 2290056                                                                  | 2290058                                                                  | 2290057                                                                  | 2290059                                                   | 2290060                                                   |

Table S 4. Selected palladium distances and angles for **3a-Tic** at 100 K

| 3a-Tic (100 K) - [PdC <sub>3</sub> H <sub>3</sub> NP](ClO <sub>4</sub> ) |          |                                   |           |                                       |          |                                   |           |
|--------------------------------------------------------------------------|----------|-----------------------------------|-----------|---------------------------------------|----------|-----------------------------------|-----------|
| ASU Molecule 1                                                           |          |                                   |           | ASU Molecule 2                        |          |                                   |           |
| Distances                                                                | (Å)      | Angles                            | (°)       | Distances                             | (Å)      | Angles                            | (°)       |
| Pd_11-P_14                                                               | 2.286(1) | P_14-Pd_11-C_12                   | 91.06(9)  | Pd_21-P_24                            | 2.282(1) | P_24-Pd_21-C_22                   | 89.73(9)  |
| Pd_11-C_12                                                               | 1.983(3) | C1_13-Pd_11-C3_13                 | 61.9(1)   | Pd_21-C_22                            | 1.983(3) | C1_23-Pd_21-C3_23                 | 62.0(1)   |
| Pd_11-C1_13                                                              | 2.245(3) | P_14-Pd_11-C3_13                  | 102.98(8) | Pd_21-C1_23                           | 2.258(3) | P_24-Pd_21-C3_23                  | 101.21(8) |
| Pd_11-C3_13                                                              | 2.201(3) | C_12-Pd_11-C1_13                  | 104.6(1)  | Pd_21-C3_23                           | 2.190(3) | C_22-Pd_21-C1_23                  | 106.6(1)  |
| Pd_11-C2_13                                                              | 2.228(3) | HA <sup>b</sup>                   | 13.25(24) | Pd_21-C2_23                           | 2.230(3) | HA <sup>b</sup>                   | 13.52(24) |
| C=C_Indenyl <sup>a</sup>                                                 | 1.415(4) | FA <sup>b</sup>                   | 9.84(25)  | C=C_Indenyl <sup>a</sup>              | 1.416(4) | FA <sup>b</sup>                   | 9.20(24)  |
| ΔM...C <sup>b</sup>                                                      | 0.280(6) | Pd-Indenyl Ave Plane <sup>d</sup> | 85.20(6)  | ΔM...C <sup>b</sup>                   | 0.283(6) | Pd-Indenyl Ave Plane <sup>d</sup> | 84.44(7)  |
| Pd_11...ClO <sub>4</sub> <sup>-</sup>                                    | 4.390(3) |                                   |           | Pd_21...ClO <sub>4</sub> <sup>-</sup> | 4.399(4) |                                   |           |

<sup>a</sup>Average C1=C2=C3 bond length in indenyl ligand; <sup>b</sup>As defined in Table 1 footnotes of Zargarian Coordination Chemistry Reviews 233-234 (2002) 157-176; <sup>c</sup>Shortest distance between palladium centre and anion; <sup>d</sup>Average angle among the mean metal coordination plane and the mean indenyl plane

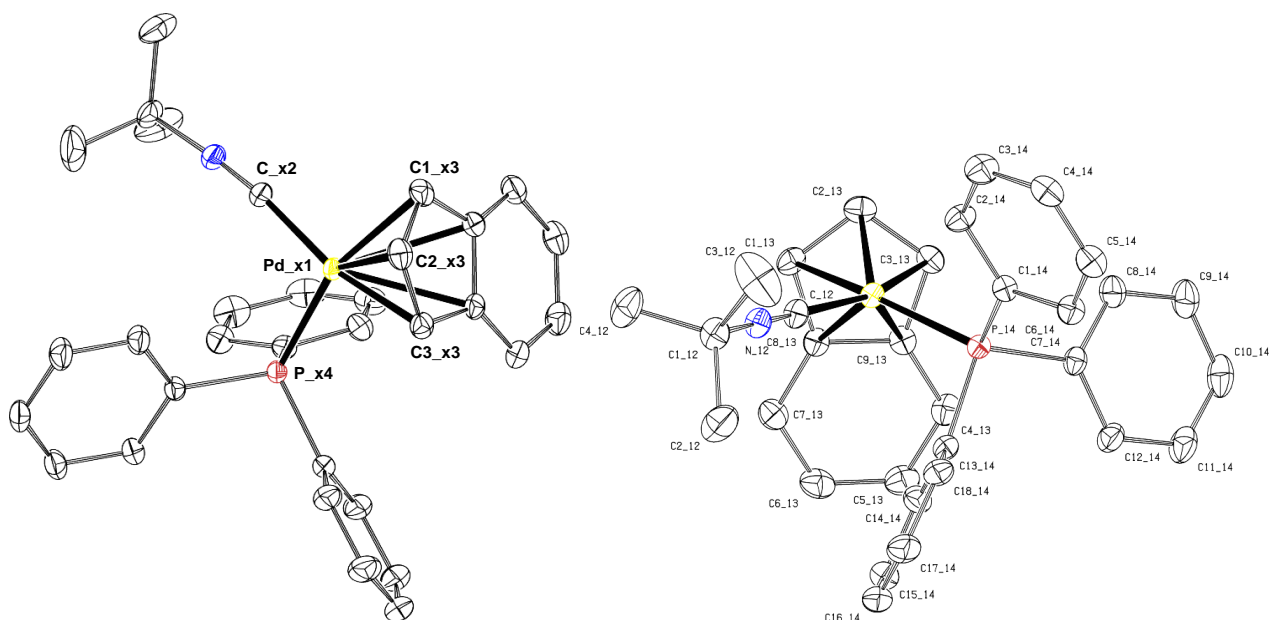

Table S 5. Selected palladium distances and angles for **3c-Tic** at 100 K

| 3c-Tic (100 K) - [PdC <sub>32</sub> H <sub>28</sub> F <sub>3</sub> NP](ClO <sub>4</sub> ) |          |                                   |           |
|-------------------------------------------------------------------------------------------|----------|-----------------------------------|-----------|
| Distances                                                                                 | (Å)      | Angles                            | (°)       |
| Pd_1-P_4                                                                                  | 2.288(1) | P_4-Pd_1-C_2                      | 95.90(3)  |
| Pd_1-C_2                                                                                  | 1.978(1) | C1_3-Pd_1-C3_3                    | 62.03(4)  |
| Pd_1-C1_3                                                                                 | 2.239(1) | P_4-Pd_1-C3_3                     | 98.81(3)  |
| Pd_1-C3_3                                                                                 | 2.184(1) | C_2-Pd_1-C1_3                     | 103.18(4) |
| Pd_1-C2_3                                                                                 | 2.226(1) | HA <sup>b</sup>                   | 14.10(7)  |
| C=C_Indenyl <sup>a</sup>                                                                  | 1.416(1) | FA <sup>b</sup>                   | 12.26(7)  |
| ΔM...C <sup>b</sup>                                                                       | 0.295(2) | Pd-Indenyl Ave Plane <sup>d</sup> | 88.20(2)  |
| Pd_1...ClO <sub>4</sub> <sup>-</sup>                                                      | 4.600(1) |                                   |           |

<sup>a</sup>Average C1=C2=C3 bond length in indenyl ligand

<sup>b</sup>As defined in Table 1 footnotes of Zargarian Coordination Chemistry Reviews 233-234 (2002) 157-176

<sup>c</sup>Shortest distance between palladium centre and anion

<sup>d</sup>Average angle among the mean metal coordination plane and the mean indenyl plane

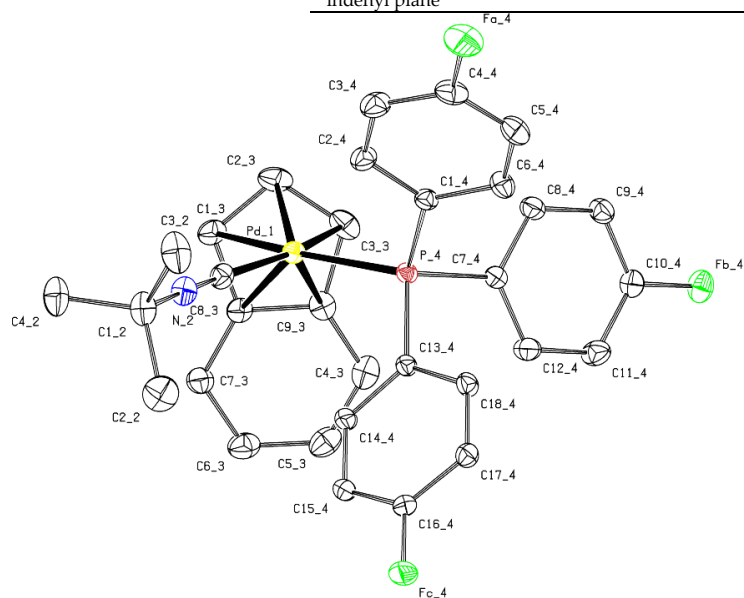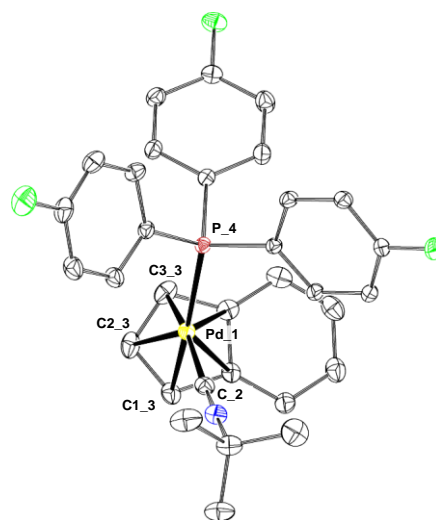

Table S 6. Selected palladium distances and angles for **3d-Tic** at 100 K

| 3d-Tic (100 K) - [PdC <sub>35</sub> H <sub>37</sub> NO <sub>3</sub> P](ClO <sub>4</sub> ) |          |                                   |           |                                      |          |                                   |           |
|-------------------------------------------------------------------------------------------|----------|-----------------------------------|-----------|--------------------------------------|----------|-----------------------------------|-----------|
| 3d-Tic                                                                                    |          |                                   |           | i3d-Tic <sup>c</sup>                 |          |                                   |           |
| Distances                                                                                 | (Å)      | Angles                            | (°)       | Distances                            | (Å)      | Angles                            | (°)       |
| Pd_1-P_4                                                                                  | 2.287(1) | P_4-Pd_1-C_2                      | 92.19 (5) | Pd_1-P_4                             | 2.286(1) | P_4-Pd_1-C_2                      | 92.23(8)  |
| Pd_1-C_2                                                                                  | 1.963(2) | C1_3-Pd_1-C3_3                    | 61.10(7)  | Pd_1-C_2                             | 1.966(3) | C1_3-Pd_1-C3_3                    | 62.2(1)   |
| Pd_1-C1_3                                                                                 | 2.237(2) | P_4-Pd_1-C3_3                     | 101.52(5) | Pd_1-C1_3                            | 2.232(3) | P_4-Pd_1-C3_3                     | 101.42(8) |
| Pd_1-C3_3                                                                                 | 2.200(2) | C_2-Pd_1-C1_3                     | 104.31(7) | Pd_1-C3_3                            | 2.204(3) | C_2-Pd_1-C1_3                     | 104.2(1)  |
| Pd_1-C2_3                                                                                 | 2.228(2) | HA <sup>b</sup>                   | 13.75(13) | Pd_1-C2_3                            | 2.227(3) | HA <sup>b</sup>                   | 13.73(22) |
| C=C_Indenyl <sup>a</sup>                                                                  | 1.420(4) | FA <sup>b</sup>                   | 12.19(12) | C=C_Indenyl <sup>a</sup>             | 1.420(5) | FA <sup>b</sup>                   | 12.02(20) |
| ΔM...C <sup>b</sup>                                                                       | 0.289(4) | Pd-Indenyl Ave Plane <sup>d</sup> | 88.98(4)  | ΔM...C <sup>b</sup>                  | 0.287(6) | Pd-Indenyl Ave Plane <sup>d</sup> | 88.69(6)  |
| Pd_1...ClO <sub>4</sub> <sup>-</sup>                                                      | 4.335(6) |                                   |           | Pd_1...ClO <sub>4</sub> <sup>-</sup> | 4.49(1)  |                                   |           |

<sup>a</sup>Average C1=C2=C3 bond length in indenyl ligand; <sup>b</sup>As defined in Table 1 footnotes of Zargarian Coordination Chemistry Reviews 233-234 (2002) 157-176; <sup>c</sup>Shortest distance between palladium centre and anion; <sup>d</sup>Average angle among the mean metal coordination plane and the mean indenyl plane; <sup>e</sup>Enantiomorph packing

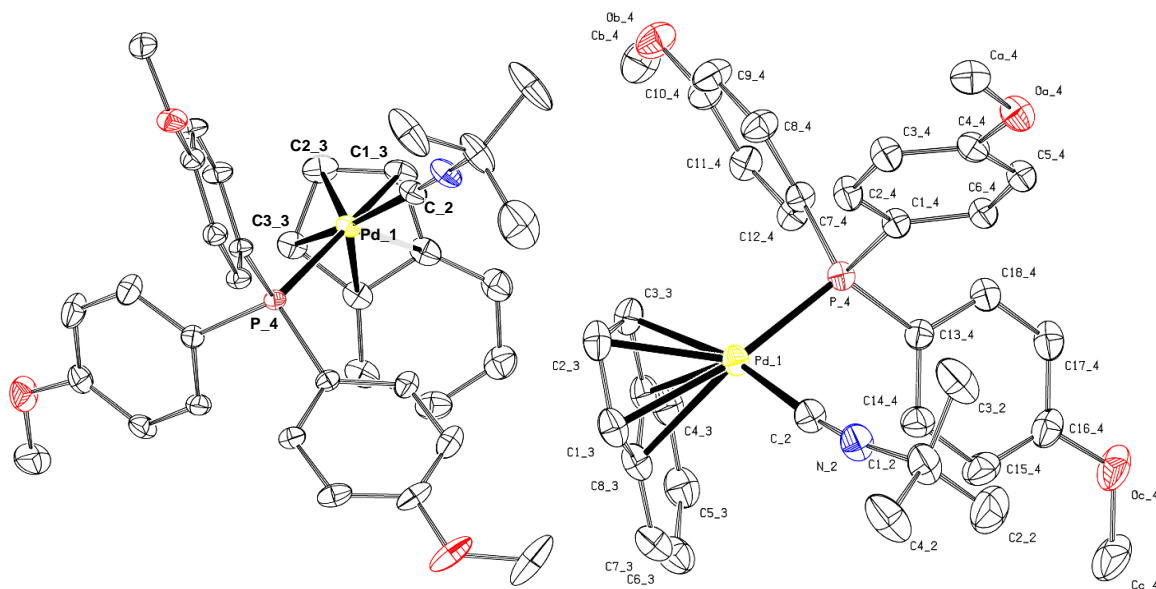



Table S 7. Selected palladium distances and angles for **3b-Tic** at 298 K

| 3b-Tic (298 K) - [PdC <sub>32</sub> H <sub>28</sub> Cl <sub>3</sub> NP](ClO <sub>4</sub> ) |          |                                   |           |
|--------------------------------------------------------------------------------------------|----------|-----------------------------------|-----------|
| Distances                                                                                  | (Å)      | Angles                            | (°)       |
| Pd_1-P_4                                                                                   | 2.283(1) | P_4-Pd_1-C_2                      | 91.90(9)  |
| Pd_1-C_2                                                                                   | 1.974(3) | C1_3-Pd_1-C3_3                    | 61.6(1)   |
| Pd_1-C1_3                                                                                  | 2.259(3) | P_4-Pd_1-C3_3                     | 100.72(8) |
| Pd_1-C3_3                                                                                  | 2.187(3) | C_2-Pd_1-C1_3                     | 105.6(1)  |
| Pd_1-C2_3                                                                                  | 2.236(3) | HA <sup>b</sup>                   | 13.12(23) |
| C=C_Indenyl <sup>a</sup>                                                                   | 1.408(6) | FA <sup>b</sup>                   | 11.13(21) |
| ΔM...C <sup>b</sup>                                                                        | 0.270(6) | Pd-Indenyl Ave Plane <sup>d</sup> | 86.92(6)  |
| Pd_1...ClO <sub>4</sub> <sup>-</sup>                                                       | 4.613(9) |                                   |           |

<sup>a</sup>Average C1=C2=C3 bond length in indenyl ligand  
<sup>b</sup>As defined in Table 1 footnotes of Zargarian Coordination Chemistry Reviews 233-234 (2002) 157-176  
<sup>c</sup>Shortest distance between palladium centre and anion  
<sup>d</sup>Average angle among the mean metal coordination plane and the mean indenyl plane

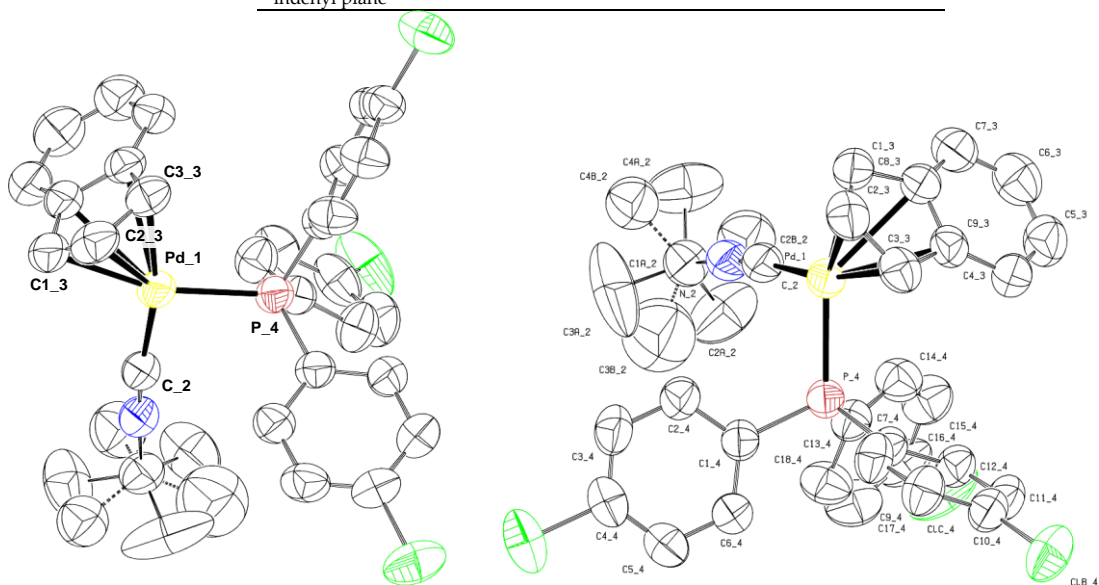

Table S 8. Selected palladium distances and angles for **3c-Cyic** at 100 K

| 3c-Cyic (100 K) - [PdC <sub>34</sub> H <sub>30</sub> F <sub>3</sub> NP](ClO <sub>4</sub> ) |          |                                   |           |
|--------------------------------------------------------------------------------------------|----------|-----------------------------------|-----------|
| Distances                                                                                  | (Å)      | Angles                            | (°)       |
| Pd_1-P_4                                                                                   | 2.296(1) | P_4-Pd_1-C_2                      | 98.31(3)  |
| Pd_1-C_2                                                                                   | 1.983(1) | C1_3-Pd_1-C3_3                    | 61.94(4)  |
| Pd_1-C1_3                                                                                  | 2.239(1) | P_4-Pd_1-C3_3                     | 99.11(3)  |
| Pd_1-C3_3                                                                                  | 2.189(1) | C_2-Pd_1-C1_3                     | 100.32(4) |
| Pd_1-C2_3                                                                                  | 2.228(1) | HA <sup>b</sup>                   | 14.21(10) |
| C=C_Indenyl <sup>a</sup>                                                                   | 1.415(2) | FA <sup>b</sup>                   | 12.27(9)  |
| ΔM...C <sup>b</sup>                                                                        | 0.298(2) | Pd-Indenyl Ave Plane <sup>d</sup> | 87.07(2)  |
| Pd_1...ClO <sub>4</sub> <sup>-</sup>                                                       | 4.766(1) |                                   |           |

<sup>a</sup>Average C1=C2=C3 bond length in indenyl ligand

<sup>b</sup>As defined in Table 1 footnotes of Zargarian Coordination Chemistry Reviews 233-234 (2002) 157-176

<sup>c</sup>Shortest distance between palladium centre and anion

<sup>d</sup>Average angle among the mean metal coordination plane and the mean indenyl plane

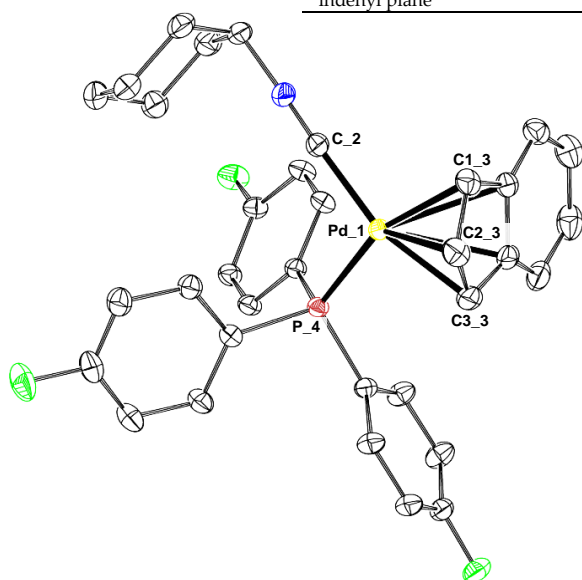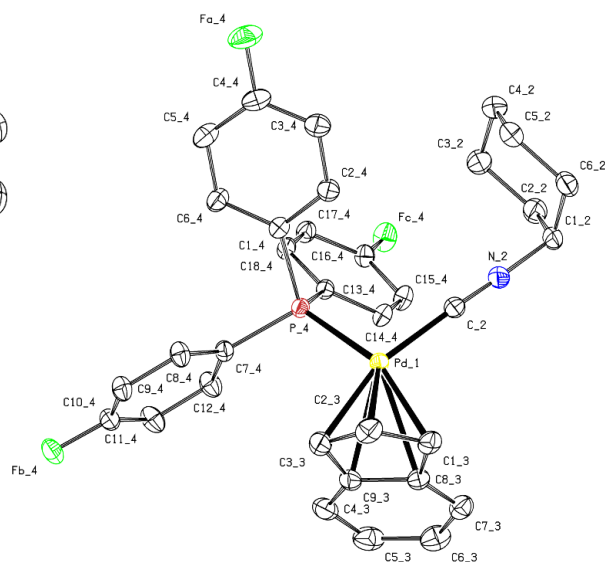

Table S 9. Selected palladium distances and angles for **3d-Cyic** at 100 K and 298 K

| 3d-Cyic - [PdC <sub>41</sub> H <sub>43</sub> NO <sub>3</sub> P](ClO <sub>4</sub> ) |          |                                   |           |                                      |          |                                   |           |
|------------------------------------------------------------------------------------|----------|-----------------------------------|-----------|--------------------------------------|----------|-----------------------------------|-----------|
| ASU@100 K                                                                          |          |                                   |           | ASU@298 K                            |          |                                   |           |
| Distances                                                                          | (Å)      | Angles                            | (°)       | Distances                            | (Å)      | Angles                            | (°)       |
| Pd_1-P_4                                                                           | 2.298(1) | P_4-Pd_1-C_2                      | 94.63(5)  | Pd_1-P_4                             | 2.296(1) | P_4-Pd_1-C_2                      | 94.45(6)  |
| Pd_1-C_2                                                                           | 1.976(2) | C1_3-Pd_1-C3_3                    | 61.68(7)  | Pd_1-C_2                             | 1.972(2) | C1_3-Pd_1-C3_3                    | 61.38(9)  |
| Pd_1-C1_3                                                                          | 2.268(2) | P_4-Pd_1-C3_3                     | 102.39(5) | Pd_1-C1_3                            | 2.263(2) | P_4-Pd_1-C3_3                     | 103.10(6) |
| Pd_1-C3_3                                                                          | 2.195(2) | C_2-Pd_1-C1_3                     | 101.17(7) | Pd_1-C3_3                            | 2.194(3) | C_2-Pd_1-C1_3                     | 100.76(8) |
| Pd_1-C2_3                                                                          | 2.223(2) | HA <sup>b</sup>                   | 13.81(16) | Pd_1-C2_3                            | 2.220(3) | HA <sup>b</sup>                   | 13.62(19) |
| C=C_Indenyl <sup>a</sup>                                                           | 1.414(3) | FA <sup>b</sup>                   | 13.51(16) | C=C_Indenyl <sup>a</sup>             | 1.410(4) | FA <sup>b</sup>                   | 12.95(17) |
| ΔM...C <sup>b</sup>                                                                | 0.311(4) | Pd-Indenyl Ave Plane <sup>d</sup> | 85.78(3)  | ΔM...C <sup>b</sup>                  | 0.318(4) | Pd-Indenyl Ave Plane <sup>d</sup> | 85.01(4)  |
| Pd_1...ClO <sub>4</sub> <sup>-</sup>                                               | 4.539(7) |                                   |           | Pd_1...ClO <sub>4</sub> <sup>-</sup> | 3.86(2)  |                                   |           |

<sup>a</sup>Average C1=C2=C3 bond length in indenyl ligand; <sup>b</sup>As defined in Table 1 footnotes of Zargarian Coordination Chemistry Reviews 233-234 (2002) 157-176;

<sup>c</sup>Shortest distance between palladium centre and anion; <sup>d</sup>Average angle among the mean metal coordination plane and the mean indenyl plane;

<sup>e</sup>Enantiomorphic packing

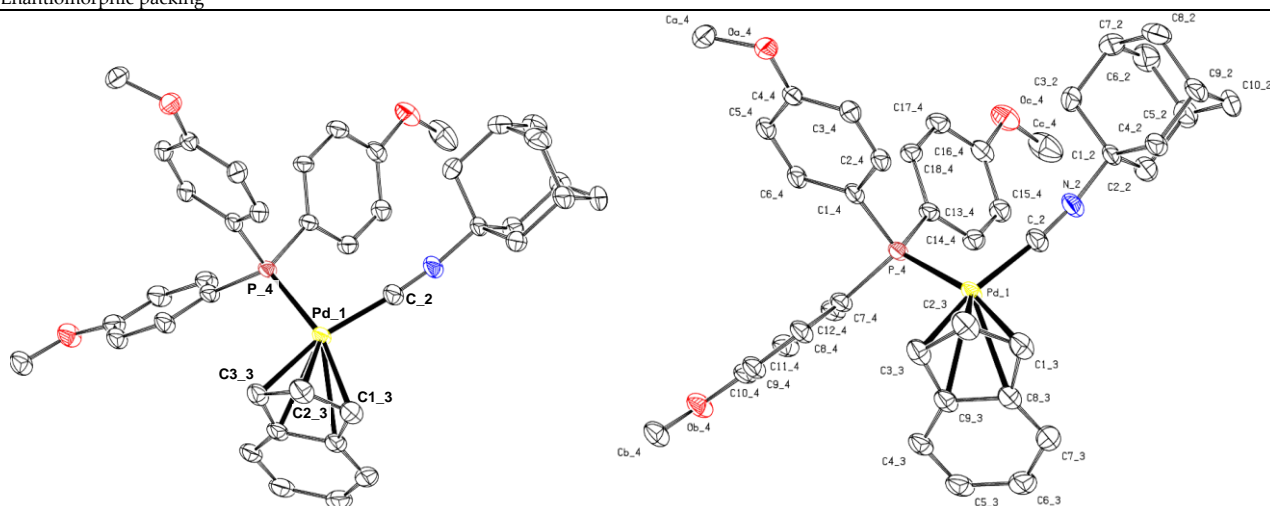

Table S 10. Selected palladium distances and angles for **EB6x** at 100 K and 298 K

| 3a-Cyic-[PdC <sub>34</sub> H <sub>33</sub> NP](ClO <sub>4</sub> ) |           |                                   |           |                                      |          |                                   |           |
|-------------------------------------------------------------------|-----------|-----------------------------------|-----------|--------------------------------------|----------|-----------------------------------|-----------|
| ASU@100 K                                                         |           |                                   |           | ASU@298 K                            |          |                                   |           |
| Distances                                                         | (Å)       | Angles                            | (°)       | Distances                            | (Å)      | Angles                            | (°)       |
| Pd_1-P_4                                                          | 2.278(1)  | P_4-Pd_1-C_2                      | 94.8(1)   | Pd_1-P_4                             | 2.285(1) | P_4-Pd_1-C_2                      | 95.09(5)  |
| Pd_1-C_2                                                          | 1.974(3)  | C1_3-Pd_1-C3_3                    | 62.2(2)   | Pd_1-C_2                             | 1.977(2) | C1_3-Pd_1-C3_3                    | 61.46(8)  |
| Pd_1-C1_3                                                         | 2.251(6)  | P_4-Pd_1-C3_3                     | 99.6(1)   | Pd_1-C1_3                            | 2.248(2) | P_4-Pd_1-C3_3                     | 100.57(6) |
| Pd_1-C3_3                                                         | 2.186(4)  | C_2-Pd_1-C1_3                     | 103.5(2)  | Pd_1-C3_3                            | 2.178(2) | C_2-Pd_1-C1_3                     | 102.85(7) |
| Pd_1-C2_3                                                         | 2.218(5)  | HA <sup>b</sup>                   | 13.77(38) | Pd_1-C2_3                            | 2.217(2) | HA <sup>b</sup>                   | 13.62(16) |
| C=C_Indenyl <sup>a</sup>                                          | 1.413(4)  | FA <sup>b</sup>                   | 10.28(31) | C=C_Indenyl <sup>a</sup>             | 1.404(4) | FA <sup>b</sup>                   | 10.36(5)  |
| ΔM...C <sup>b</sup>                                               | 0.295(10) | Pd-Indenyl Ave Plane <sup>d</sup> | 86.68(8)  | ΔM...C <sup>b</sup>                  | 0.304(4) | Pd-Indenyl Ave Plane <sup>d</sup> | 86.80(3)  |
| Pd_1...ClO <sub>4</sub> <sup>-</sup>                              | 4.730(3)  |                                   |           | Pd_1...ClO <sub>4</sub> <sup>-</sup> | 4.793(3) |                                   |           |

<sup>a</sup>Average C1=C2=C3 bond length in indenyl ligand; <sup>b</sup>As defined in Table 1 footnotes of Zargarian Coordination Chemistry Reviews 233-234 (2002) 157-176; <sup>c</sup>Shortest distance between palladium centre and anion; <sup>d</sup>Average angle among the mean metal coordination plane and the mean indenyl plane; <sup>e</sup>Enantiomorphic packing

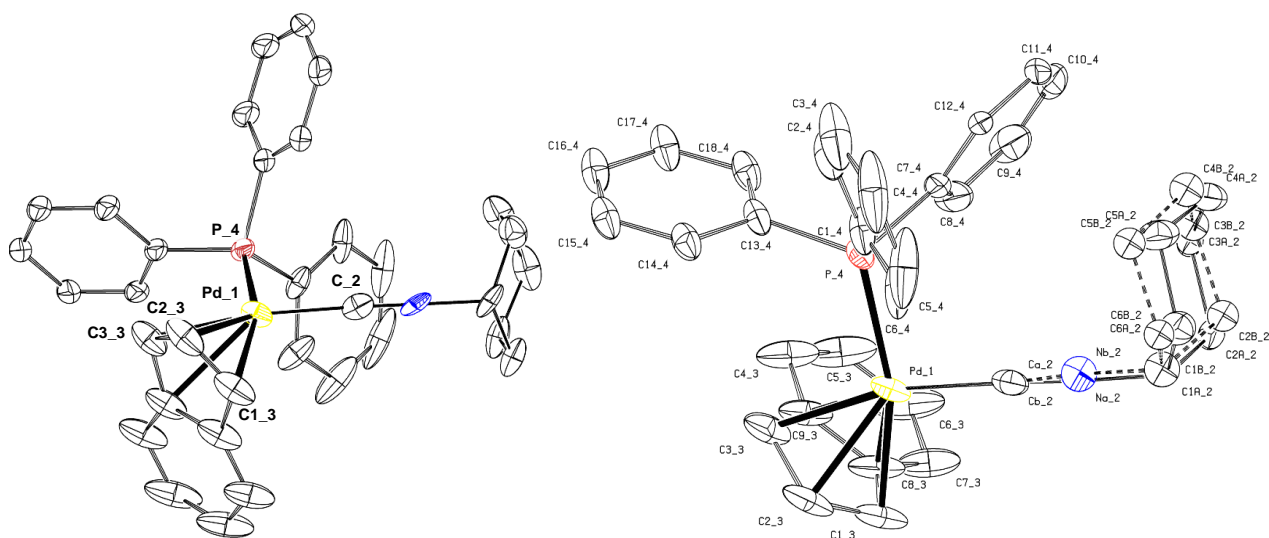

## X-ray diffraction analysis - Structural characterization

**3a-Tic**, **3c-Tic**, **3d-Tic**, **3b-Tic**, **3c-Cyic**, **3d-Adic** and **3a-Cyic** molecules have been crystallized, characterized through XRD and show square planar Palladium coordination spheres (Tables S4-S10). All the crystalline forms bear one crystallographically independent palladium complex each, while **3a-Tic** show 2 molecules in the asymmetric unit (Figure S 82). Each complex bear a perchlorate counterion that balance the palladium centre net positive charge, with a Pd...O distance of ~4.0 Å. Conformations of **3a-Tic**, **3c-Tic**, **3d-Tic**, **3b-Tic**, **3c-Cyic** and **3a-Cyic** are well superimposable with limited phenyl sidechains rotations; minor phosphine rearrangements are found with the bulkier adamantly isocyanide in **3d-Adic** (Figure S 83) – R.M.S.D. < 1 Å among common atoms).

Indenyl ligand is almost perpendicular to the palladium coordination plane with equivalent hinge and fold angles and “slippage” of the ligand (compared to an idealised pentahapto coordination), as measured with HA, FA and  $\Delta M \cdots C$  parameters [1] respectively (Tables S4-S10).

Crystal packing show hydrophobic contacts among neighbour molecules, involving weak intermolecular  $\pi \cdots \pi$  and  $CH \cdots \pi$  interactions, among neighbour aromatic rings. Solvent molecules have been found in the crystal packing of **3a-Tic**. Chloroform molecules are bound to perchlorate oxygen atoms in anions through polar contacts (shortest  $d_{CH \cdots O} = 3.165(5)$  Å). No phase transitions have been found for samples characterized at 100K and 298 K.

S 82. Ortep representations of asymmetric unit contents for **3a-Tic** at 100 K (A), **3c-Tic** at 100 K (B), **3d-Tic** at 100 K (C), **3d-Tic** at 100 K (enantiomorphic packing - D), **3b-Tic** at 298 K (E), **3c-Cyic** at 100 K (F), **3d-Adic** at 100 K (G), **3d-Adic** at 298 K (H), **3a-Cyic** at 100 K (I) and **3a-Cyic** at 298 K (L). Ellipsoids dimensions correspond to 50% probability.

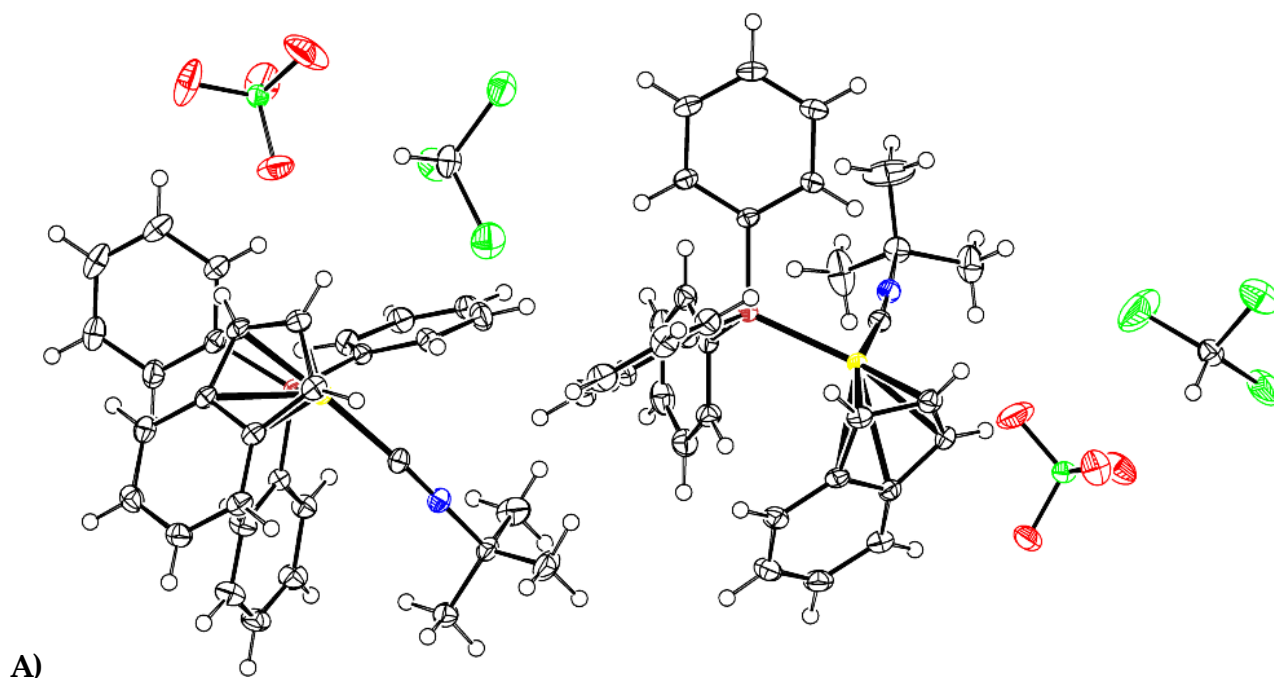

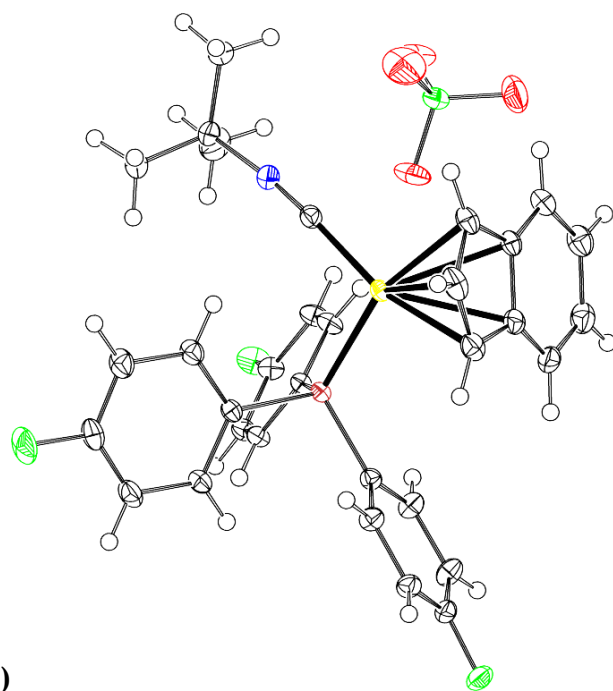

**B)**

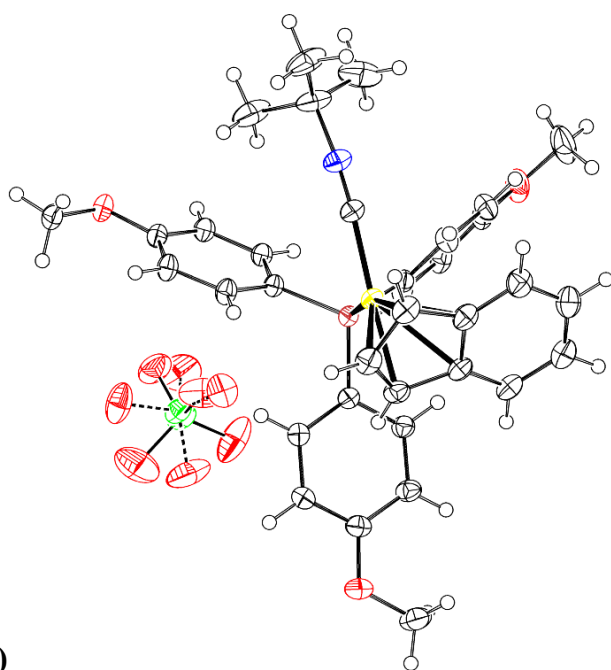

**C)**

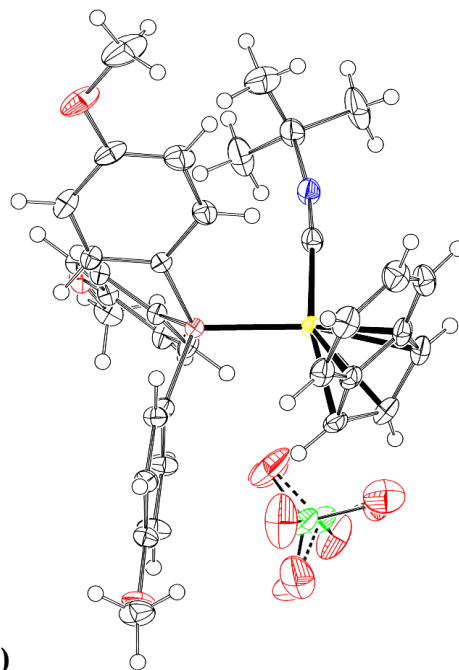

**D)**

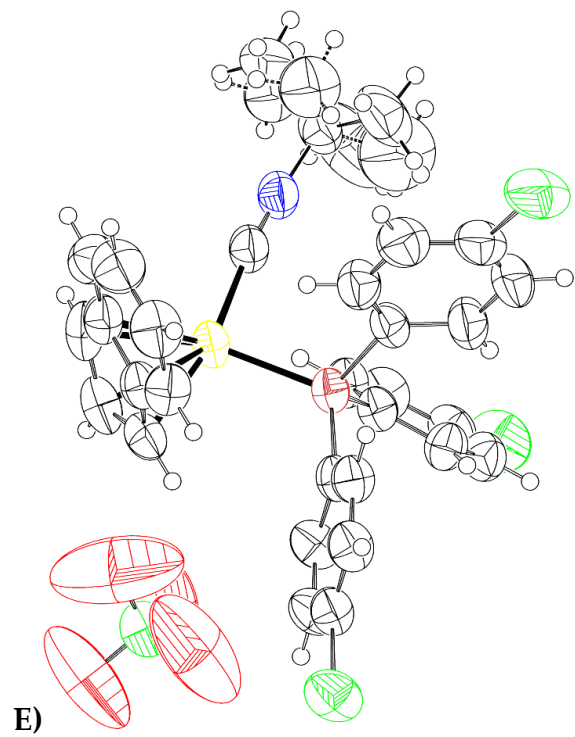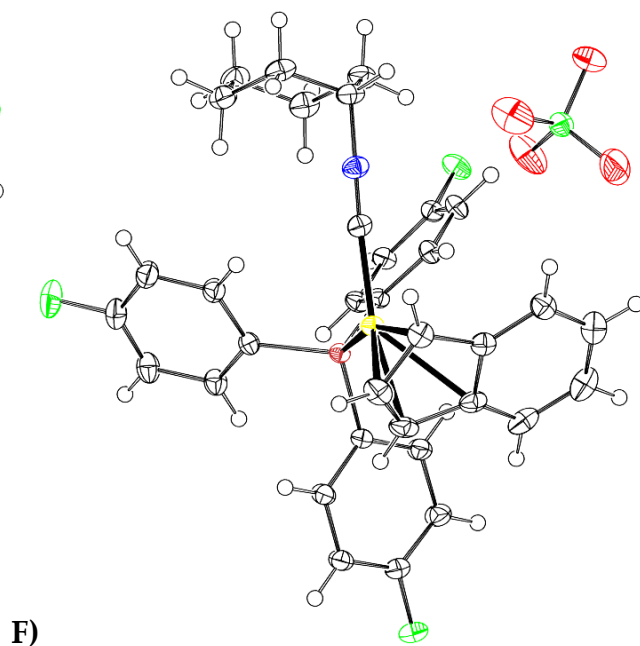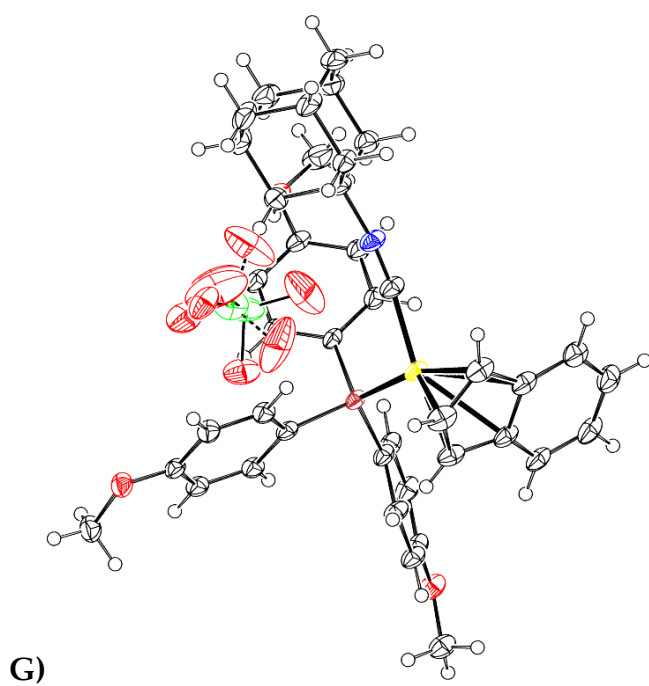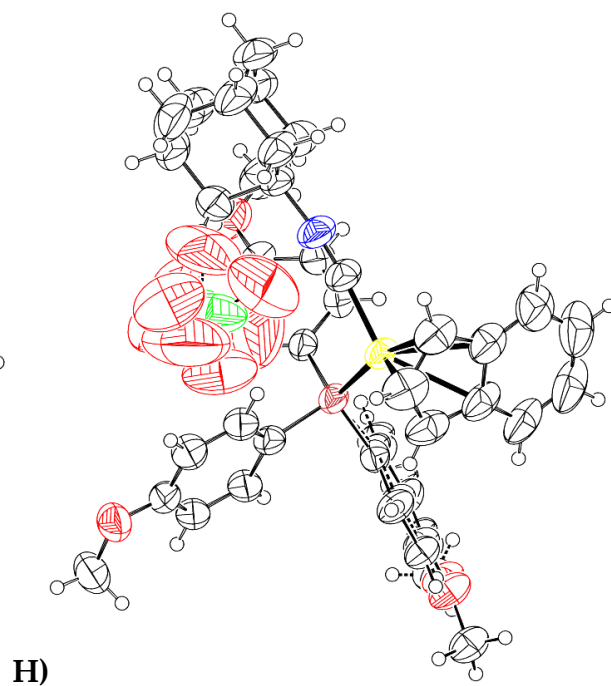

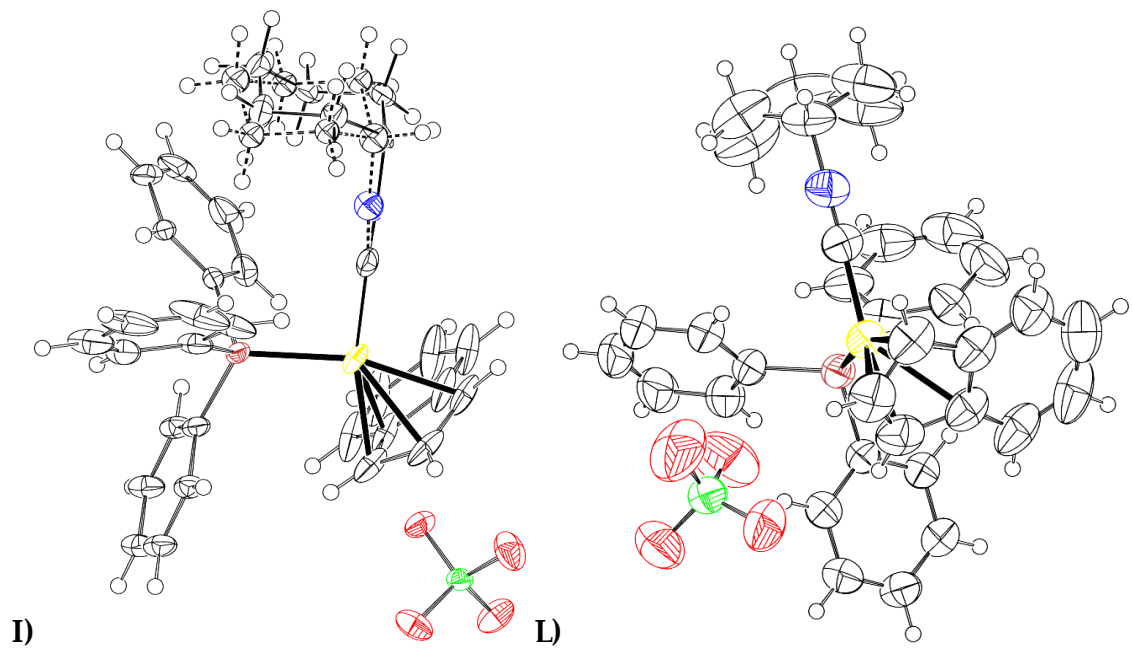



S 83. Overlap of crystallographically independent molecules bearing tert-butyl isocyanide complexes (**3a-Tic**, **3c-Tic**, **3d-Tic**, **3b-Tic** - yellow sticks), 1-adamantyl isocyanide complexes (**3d-Adic** - blue sticks) and cyclohexyl isocyanide complexes (**3c-Cyic**, **3a-Cyic** - pink sticks). Hydrogens omitted for clarity

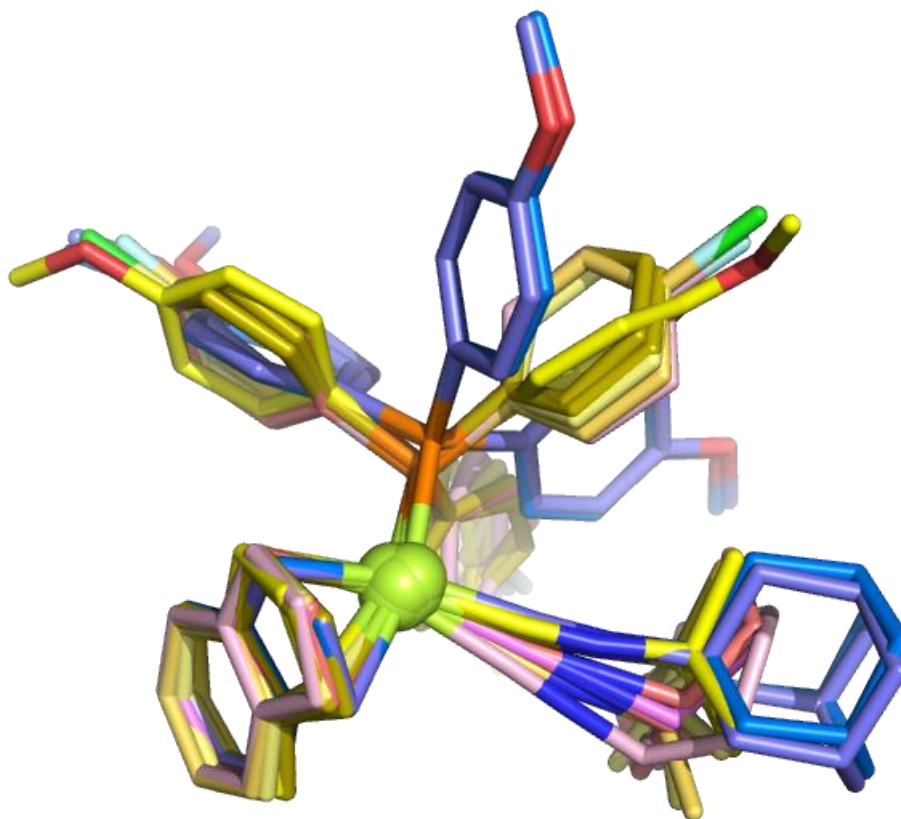

## References

1. Zargarian, D. Group 10 Metal Indenyl Complexes. *Coord. Chem. Rev.* **2002**, 233–234, 157–176, doi:10.1016/S0010-8545(02)00201-1.
